# Supplementary material for: Bi-Allelic TCRα or β Recombination Enhances T Cell Development but Is Dispensable for Antigen Responses and Experimental Autoimmune Encephalomyelitis
Source: PLoS One. 2015 Dec 22;10(12):e0145762. doi: 10.1371/journal.pone.0145762 (PMC4687847; doi:10.1371/journal.pone.0145762)
Supplement: S1 Table — The table contains two sheets, one showing productive rearrangements and the other non-productive TCRβ rearrangements. The number of times each sequence appears is indicated in the table. Data are shown for three WT and three single TCR T cell C57BL/6 mice. (XLSX) [file pone.0145762.s004.xlsx]

## Sheet: Productive
aminoAcid	vGeneName	jGeneName	total	1 C57BL/6	2 C57BL/6	3 C57BL/6	1 TCRα+/-β+/-	2 TCRα+/-β+/-	3 TCRα+/-β+/-
CASSIGISNERLFF	TCRBV19-01	TCRBJ01-04	887	4	10	837	0	0	36
CASSPSSYEQYF	TCRBV03-01	TCRBJ02-07	721	69	76	58	222	186	110
CASGDAGEQYF	TCRBV13-02	TCRBJ02-07	539	35	68	68	173	119	76
CASSSYEQYF	TCRBV04-01	TCRBJ02-07	482	43	140	115	15	44	125
CASGDLGGFNYAEQFF	TCRBV13-02	TCRBJ02-01	438	0	0	438	0	0	0
CASGDYEQYF	TCRBV13-02	TCRBJ02-07	432	19	6	28	260	50	69
CASSQEDSSYEQYF	TCRBV05-01	TCRBJ02-07	429	0	0	429	0	0	0
CATGQGEETLYF	TCRBV13-03	TCRBJ02-03	414	0	0	414	0	0	0
CASRRDNSQNTLYF	TCRBV29-01	TCRBJ02-04	301	0	0	0	301	0	0
CAWSRTNNQDTQYF	TCRBV31-01	TCRBJ02-05	298	0	0	0	0	0	298
CTCSADGDTQYF	TCRBV01-01	TCRBJ02-05	295	0	0	26	12	257	0
CASGYEQYF	TCRBV13-02	TCRBJ02-07	287	33	0	57	94	45	58
CATGNSAETLYF	TCRBV13-03	TCRBJ02-03	263	0	0	0	263	0	0
CGARFRDGNTLYF	TCRBV20-01	TCRBJ01-03	253	0	0	0	253	0	0
CTCSAGTGGYEQYF	TCRBV01-01	TCRBJ02-07	252	17	9	21	150	55	0
CTCSADWGGDTQYF	TCRBV01-01	TCRBJ02-05	251	0	0	7	0	237	7
CASGDAEQYF	TCRBV13-02	TCRBJ02-07	247	29	29	9	54	36	90
CASGDTTGGAPEQYF	TCRBV13-02	TCRBJ02-07	247	0	0	0	0	0	247
CASSEWGGNYAEQFF	TCRBV13-03	TCRBJ02-01	243	0	0	237	6	0	0
CASSRQRSAETLYF	TCRBV04-01	TCRBJ02-03	236	0	0	0	0	0	236
CASSYSYEQYF	TCRBV04-01	TCRBJ02-07	233	4	50	58	23	57	41
CTCSADLGYEQYF	TCRBV01-01	TCRBJ02-07	233	26	52	0	45	49	61
CASGDSGNTLYF	TCRBV13-02	TCRBJ01-03	231	17	40	0	90	53	31
CASGDEQYF	TCRBV13-02	TCRBJ02-07	229	11	85	0	24	23	86
CASSSGTGVGNTLYF	TCRBV05-01	TCRBJ01-03	229	0	0	0	0	229	0
CASSLEYSQNTLYF	TCRBV03-01	TCRBJ02-04	227	0	0	0	0	0	227
CASSLRVANTGQLYF	TCRBV16-01	TCRBJ02-02	224	0	0	0	224	0	0
CTCSYRGASYEQYF	TCRBV01-01	TCRBJ02-07	223	0	0	0	223	0	0
CTCSAELGSYAEQFF	TCRBV01-01	TCRBJ02-01	220	0	0	0	220	0	0
CASSPGLGGRRDTQYF	TCRBV14-01	TCRBJ02-05	214	4	0	0	210	0	0
CASSSGITEVFF	TCRBV03-01	TCRBJ01-01	212	0	0	212	0	0	0
CASSLELGLNTLYF	TCRBV12-01	TCRBJ02-04	208	0	0	0	208	0	0
CASSSDSAETLYF	TCRBV03-01	TCRBJ02-03	208	0	5	0	203	0	0
CASGDAGYEQYF	TCRBV13-02	TCRBJ02-07	207	34	0	65	51	53	4
CASGDALGGYEQYF	TCRBV13-02	TCRBJ02-07	207	25	0	13	98	28	43
CASSDAGYEQYF	TCRBV13-01	TCRBJ02-07	203	4	0	17	98	31	53
CASSESTNTGQLYF	TCRBV13-01	TCRBJ02-02	201	0	0	0	201	0	0
CASSLDYEQYF	TCRBV16-01	TCRBJ02-07	200	0	0	50	55	83	12
CTCSADSYEQYF	TCRBV01-01	TCRBJ02-07	200	31	0	0	165	0	4
CGARDWGSSYEQYF	TCRBV20-01	TCRBJ02-07	199	36	24	75	36	7	21
CASSQDQTGGAEQFF	TCRBV02-01	TCRBJ02-01	198	0	0	198	0	0	0
CASSLGGNTEVFF	TCRBV03-01	TCRBJ01-01	195	0	12	0	12	60	111
CASSLGTGGYEQYF	TCRBV03-01	TCRBJ02-07	194	16	13	48	0	90	27
CASSWTGGGTEVFF	TCRBV03-01	TCRBJ01-01	194	194	0	0	0	0	0
CTCSAGYEQYF	TCRBV01-01	TCRBJ02-07	192	16	49	0	0	66	61
CASSLRLGGFAEQFF	TCRBV03-01	TCRBJ02-01	191	0	0	191	0	0	0
CASGDAYEQYF	TCRBV13-02	TCRBJ02-07	188	0	51	23	60	50	4
CTCSADRANTEVFF	TCRBV01-01	TCRBJ01-01	187	24	30	50	51	32	0
CTCSADSSGNTLYF	TCRBV01-01	TCRBJ01-03	182	0	0	70	79	33	0
CTCSADWGGEQYF	TCRBV01-01	TCRBJ02-07	182	9	0	0	0	173	0
CASSLTDSGNTLYF	TCRBV04-01	TCRBJ01-03	181	22	46	11	44	37	21
CASSPGTGGYEQYF	TCRBV12-02	TCRBJ02-07	180	17	19	22	73	16	33
CASTGHQYAEQFF	TCRBV15-01	TCRBJ02-01	177	0	0	0	177	0	0
CASSIGYEQYF	TCRBV19-01	TCRBJ02-07	176	14	14	0	60	67	21
CASSQDWGSSYEQYF	TCRBV02-01	TCRBJ02-07	176	64	15	34	47	12	4
CASSLEGSGNTLYF	TCRBV03-01	TCRBJ01-03	175	24	5	15	89	42	0
CASSPWGENTGQLYF	TCRBV12-02	TCRBJ02-02	175	0	175	0	0	0	0
CASSDSYEQYF	TCRBV13-01	TCRBJ02-07	174	26	8	0	108	9	23
CTCSGGLGGLYEQYF	TCRBV01-01	TCRBJ02-07	173	0	0	0	106	67	0
CASSPDNYEQYF	TCRBV03-01	TCRBJ02-07	171	13	48	0	48	35	27
CASSQDWGGYEQYF	TCRBV05-01	TCRBJ02-07	170	0	7	31	49	19	64
CASGDWGYEQYF	TCRBV13-02	TCRBJ02-07	168	11	0	44	67	17	29
CTCSADRQNTEVFF	TCRBV01-01	TCRBJ01-01	168	46	0	10	88	24	0
CTCSADNSGNTLYF	TCRBV01-01	TCRBJ01-03	164	0	58	9	27	15	55
CASSQDSGAYEQYF	TCRBV02-01	TCRBJ02-07	163	0	0	154	0	9	0
CASGDWGSAETLYF	TCRBV13-02	TCRBJ02-03	162	19	19	20	62	42	0
CASSFSAETLYF	TCRBV04-01	TCRBJ02-03	162	28	21	36	23	54	0
CASGTGNYAEQFF	TCRBV13-02	TCRBJ02-01	161	0	0	102	59	0	0
CASIQYNNQAPLF	TCRBV29-01	TCRBJ01-05	161	0	0	161	0	0	0
CASSLEQNSDYTF	TCRBV03-01	TCRBJ01-02	161	46	4	0	48	63	0
CTCSADRGNTEVFF	TCRBV01-01	TCRBJ01-01	160	0	0	73	6	29	52
CASGDRGNSDYTF	TCRBV13-02	TCRBJ01-02	159	22	0	6	83	0	48
CASSLSYEQYF	TCRBV04-01	TCRBJ02-07	158	32	79	0	25	18	4
CASSSSSYEQYF	TCRBV03-01	TCRBJ02-07	158	0	25	40	89	4	0
CASGDGGYEQYF	TCRBV13-02	TCRBJ02-07	157	12	7	0	57	13	68
CASGDNSGNTLYF	TCRBV13-02	TCRBJ01-03	157	44	20	13	34	21	25
CASSIAGYEQYF	TCRBV19-01	TCRBJ02-07	156	0	0	136	0	0	20
CASSLGTGGYEQYF	TCRBV12-02	TCRBJ02-07	156	21	0	33	0	44	58
CTCSAVLGAETLYF	TCRBV01-01	TCRBJ02-03	156	0	0	0	156	0	0
CASSDNNERLFF	TCRBV13-03	TCRBJ01-04	155	10	16	31	41	57	0
CASSLGWGGSTGQLYF	TCRBV03-01	TCRBJ02-02	155	0	0	0	155	0	0
CTCSADRDEQYF	TCRBV01-01	TCRBJ02-07	154	5	4	28	41	25	51
CASGDANSDYTF	TCRBV13-02	TCRBJ01-02	153	0	34	0	100	19	0
CASRDRSSYEQYF	TCRBV29-01	TCRBJ02-07	152	0	0	152	0	0	0
CASSDSAETLYF	TCRBV13-01	TCRBJ02-03	152	6	27	29	57	33	0
CASGGYEQYF	TCRBV13-02	TCRBJ02-07	151	23	57	13	58	0	0
CASGDSYEQYF	TCRBV13-02	TCRBJ02-07	150	56	25	0	59	10	0
CASSDRYEQYF	TCRBV13-03	TCRBJ02-07	150	37	21	32	20	12	28
CASSLDWGGYEQYF	TCRBV03-01	TCRBJ02-07	150	7	8	23	49	32	31
CASSLGGANTEVFF	TCRBV03-01	TCRBJ01-01	150	45	36	0	18	51	0
CASSLGGNSDYTF	TCRBV12-01	TCRBJ01-02	150	49	0	51	26	24	0
CASSLGEQYF	TCRBV12-01	TCRBJ02-07	149	28	59	43	19	0	0
CASSSGQGERLFF	TCRBV15-01	TCRBJ01-04	149	0	0	0	0	135	14
CASSSGQYEQYF	TCRBV03-01	TCRBJ02-07	148	19	0	0	48	0	81
CASGDAGTGGGKRLFF	TCRBV13-02	TCRBJ01-04	147	0	0	0	147	0	0
CTCSADWGGYEQYF	TCRBV01-01	TCRBJ02-07	147	5	92	0	29	21	0
CASSQTGYEQYF	TCRBV05-01	TCRBJ02-07	146	0	4	96	0	14	32
CTCSAGDEQYF	TCRBV01-01	TCRBJ02-07	145	30	0	0	40	75	0
CTCSTDWGENTLYF	TCRBV01-01	TCRBJ02-04	145	0	0	0	145	0	0
CASGDRVEQYF	TCRBV13-02	TCRBJ02-07	144	0	6	0	54	21	63
CASSPGTGGYEQYF	TCRBV12-01	TCRBJ02-07	144	0	5	65	4	34	36
CTCSAGGQGDTEVFF	TCRBV01-01	TCRBJ01-01	144	0	0	144	0	0	0
CASSWDSSNERLFF	TCRBV03-01	TCRBJ01-04	142	0	0	130	0	12	0
CASGDAGGSYEQYF	TCRBV13-02	TCRBJ02-07	141	0	96	13	5	8	19
CASSDAGSAETLYF	TCRBV13-01	TCRBJ02-03	141	6	5	0	47	21	62
CASSEGANTEVFF	TCRBV13-03	TCRBJ01-01	141	0	0	134	7	0	0
CTCSADRAGNTLYF	TCRBV01-01	TCRBJ01-03	141	15	48	23	0	11	44
CTCSPTGDEQYF	TCRBV01-01	TCRBJ02-07	141	0	0	0	0	141	0
CASSLGTGGYEQYF	TCRBV12-01	TCRBJ02-07	140	22	6	17	68	27	0
CASSGTGGYEQYF	TCRBV13-03	TCRBJ02-07	139	29	0	54	33	23	0
CASSSSSYEQYF	TCRBV04-01	TCRBJ02-07	139	0	0	73	31	0	35
CASSLYEQYF	TCRBV04-01	TCRBJ02-07	138	29	0	0	45	64	0
CTCSADRGNQAPLF	TCRBV01-01	TCRBJ01-05	138	0	50	52	6	0	30
CASGDQDTQYF	TCRBV13-02	TCRBJ02-05	137	12	21	6	60	23	15
CASGDRDEQYF	TCRBV13-02	TCRBJ02-07	137	42	28	0	0	27	40
CASSLGDWGYEQYF	TCRBV03-01	TCRBJ02-07	137	0	0	41	64	0	32
CASSQDWGGYEQYF	TCRBV02-01	TCRBJ02-07	137	14	18	13	58	34	0
CAWSLGEQYF	TCRBV31-01	TCRBJ02-07	137	0	30	24	34	49	0
CGARDSYEQYF	TCRBV20-01	TCRBJ02-07	137	0	0	34	50	30	23
CASSLTGDEQYF	TCRBV03-01	TCRBJ02-07	135	21	0	0	0	34	80
CASSQEGTGGYEQYF	TCRBV05-01	TCRBJ02-07	135	19	0	0	63	53	0
CASSQEGQGGNTLYF	TCRBV05-01	TCRBJ01-03	134	0	0	127	0	7	0
CASGDGYEQYF	TCRBV13-02	TCRBJ02-07	133	0	58	45	0	30	0
CASGDRGEQYF	TCRBV13-02	TCRBJ02-07	133	17	87	17	0	12	0
CASSLDSYEQYF	TCRBV16-01	TCRBJ02-07	133	31	23	0	0	66	13
CASSQEGTGGYEQYF	TCRBV02-01	TCRBJ02-07	133	55	0	16	17	45	0
CASSLGGGSYEQYF	TCRBV03-01	TCRBJ02-07	132	0	11	0	77	44	0
CTCSADRANSDYTF	TCRBV01-01	TCRBJ01-02	131	17	0	25	47	7	35
CASGDAGGYEQYF	TCRBV13-02	TCRBJ02-07	130	33	29	22	12	30	4
CASSIGTGGYEQYF	TCRBV19-01	TCRBJ02-07	130	12	46	11	52	9	0
CASSDGQGSGQLYF	TCRBV13-01	TCRBJ02-02	129	0	0	129	0	0	0
CASSQGTGFAEQFF	TCRBV05-01	TCRBJ02-01	129	0	0	0	129	0	0
CASSRVGYEQYF	TCRBV17-01	TCRBJ02-07	129	0	0	0	25	0	104
CTCSAGQYEQYF	TCRBV01-01	TCRBJ02-07	129	0	25	11	47	42	4
CASGDAQYEQYF	TCRBV13-02	TCRBJ02-07	128	25	26	41	13	0	23
CASSLDNNQAPLF	TCRBV03-01	TCRBJ01-05	128	5	0	60	15	0	48
CASSDGTGGYEQYF	TCRBV13-01	TCRBJ02-07	127	44	27	16	20	20	0
CASSFSYEQYF	TCRBV04-01	TCRBJ02-07	127	0	14	17	63	33	0
CASSLGSSYEQYF	TCRBV03-01	TCRBJ02-07	127	13	0	46	47	0	21
CASSLGNSGNTLYF	TCRBV03-01	TCRBJ01-03	126	9	0	0	0	43	74
CASSLYEQYF	TCRBV14-01	TCRBJ02-07	126	0	24	0	44	0	58
CASGEEVFF	TCRBV13-02	TCRBJ01-01	125	0	0	0	28	32	65
CASSLGANSDYTF	TCRBV12-01	TCRBJ01-02	125	25	8	55	6	18	13
CASSLTTNSDYTF	TCRBV03-01	TCRBJ01-02	125	7	11	13	47	7	40
CTCSADREQYF	TCRBV01-01	TCRBJ02-07	125	0	0	0	0	66	59
CASSFRVANTGQLYF	TCRBV16-01	TCRBJ02-02	124	0	0	0	0	0	124
CASSQDPVNTGQLYF	TCRBV02-01	TCRBJ02-02	124	0	0	0	124	0	0
CAWTGGSAETLYF	TCRBV31-01	TCRBJ02-03	124	0	40	0	8	0	76
CASGDGTGGYEQYF	TCRBV13-02	TCRBJ02-07	123	4	46	30	24	0	19
CTCSADNYEQYF	TCRBV01-01	TCRBJ02-07	123	0	4	57	0	32	30
CTCSAGGGEQYF	TCRBV01-01	TCRBJ02-07	123	60	0	0	55	8	0
CASGDAGNSDYTF	TCRBV13-02	TCRBJ01-02	122	17	35	8	50	12	0
CASSDLGGYEQYF	TCRBV13-03	TCRBJ02-07	121	6	6	26	0	12	71
CASSQERGYEQYF	TCRBV05-01	TCRBJ02-07	121	15	4	43	55	4	0
CTCRQNSGNTLYF	TCRBV01-01	TCRBJ01-03	121	0	0	0	0	121	0
CTCSAGGYEQYF	TCRBV01-01	TCRBJ02-07	121	0	0	33	39	49	0
CASSLTGGYEQYF	TCRBV04-01	TCRBJ02-07	120	9	23	0	32	17	39
CASSQGTGGYEQYF	TCRBV05-01	TCRBJ02-07	120	9	10	17	46	38	0
CASGDGEQYF	TCRBV13-02	TCRBJ02-07	119	28	22	0	27	42	0
CTCSAQISNERLFF	TCRBV01-01	TCRBJ01-04	119	0	0	9	110	0	0
CASGDSAETLYF	TCRBV13-02	TCRBJ02-03	118	10	0	4	93	11	0
CASSDRDEQYF	TCRBV13-03	TCRBJ02-07	118	0	65	26	27	0	0
CASSFSQNTLYF	TCRBV04-01	TCRBJ02-04	118	9	0	27	56	9	17
CASGDNSYEQYF	TCRBV13-02	TCRBJ02-07	117	0	16	14	82	5	0
CASSSSSYEQYF	TCRBV16-01	TCRBJ02-07	117	0	10	24	44	39	0
CASGDRGYEQYF	TCRBV13-02	TCRBJ02-07	116	6	14	0	53	43	0
CASGDWGGAETLYF	TCRBV13-02	TCRBJ02-03	116	18	14	11	34	35	4
CASSSTANSDYTF	TCRBV16-01	TCRBJ01-02	116	0	58	43	4	11	0
CTCSAGTGGAETLYF	TCRBV01-01	TCRBJ02-03	116	0	0	0	67	12	37
CASGDADEQYF	TCRBV13-02	TCRBJ02-07	115	28	15	38	8	14	12
CASSPTGGGSDYTF	TCRBV16-01	TCRBJ01-02	115	0	0	115	0	0	0
CASSSGTGGYEQYF	TCRBV03-01	TCRBJ02-07	115	16	36	17	0	0	46
CASSLDNSGNTLYF	TCRBV12-02	TCRBJ01-03	114	10	38	22	0	32	12
CASSPGTGGYEQYF	TCRBV19-01	TCRBJ02-07	114	36	12	9	20	0	37
CASSSGTGGYEQYF	TCRBV04-01	TCRBJ02-07	114	16	30	30	0	36	2
CAWSLVNYEQYF	TCRBV31-01	TCRBJ02-07	114	0	0	0	90	24	0
CGARDIANSDYTF	TCRBV20-01	TCRBJ01-02	114	9	14	15	12	0	64
CASGDAGGGYEQYF	TCRBV13-02	TCRBJ02-07	113	0	34	14	37	28	0
CASSFQDTQYF	TCRBV04-01	TCRBJ02-05	113	21	4	0	15	47	26
CAWSLAWGSYEQYF	TCRBV31-01	TCRBJ02-07	113	0	0	78	35	0	0
CTCSADRYEQYF	TCRBV01-01	TCRBJ02-07	113	4	4	46	36	21	2
CTCSAGQNTEVFF	TCRBV01-01	TCRBJ01-01	113	0	44	18	7	44	0
CASGDAGGSAETLYF	TCRBV13-02	TCRBJ02-03	112	0	19	19	27	18	29
CASSPGTANSDYTF	TCRBV29-01	TCRBJ01-02	112	18	35	0	25	0	34
CASSQDRGSQNTLYF	TCRBV02-01	TCRBJ02-04	112	8	20	14	41	4	25
CASGDSSGNTLYF	TCRBV13-02	TCRBJ01-03	111	25	13	0	73	0	0
CASSDGEQYF	TCRBV13-01	TCRBJ02-07	111	8	4	15	51	33	0
CASSSDWENTLYF	TCRBV16-01	TCRBJ02-04	111	0	0	0	111	0	0
CASGDARGYEQYF	TCRBV13-02	TCRBJ02-07	110	4	4	0	48	14	40
CASSIDRYEQYF	TCRBV19-01	TCRBJ02-07	110	0	0	73	13	24	0
CASSLENSDYTF	TCRBV03-01	TCRBJ01-02	110	20	16	19	17	38	0
CASSLGGNYAEQFF	TCRBV12-01	TCRBJ02-01	110	5	27	45	29	4	0
CGALRGSYEQYF	TCRBV20-01	TCRBJ02-07	110	0	0	110	0	0	0
CTCSADQNTLYF	TCRBV01-01	TCRBJ02-04	110	45	0	0	0	34	31
CTCSAGGNYAEQFF	TCRBV01-01	TCRBJ02-01	110	0	0	0	14	22	74
CASGEYEQYF	TCRBV13-02	TCRBJ02-07	109	0	4	9	59	31	6
CASSLGQYEQYF	TCRBV03-01	TCRBJ02-07	109	9	11	29	0	13	47
CASSRDWGYEQYF	TCRBV14-01	TCRBJ02-07	109	9	9	0	0	8	83
CASGENYEQYF	TCRBV13-02	TCRBJ02-07	108	26	24	0	0	21	37
CASSLGTTNSDYTF	TCRBV12-02	TCRBJ01-02	108	0	0	41	0	4	63
CASSSRDWGYEQYF	TCRBV04-01	TCRBJ02-07	108	0	9	84	0	11	4
CASGDAGGGAETLYF	TCRBV13-02	TCRBJ02-03	107	12	0	8	25	14	48
CASSDADTQYF	TCRBV13-01	TCRBJ02-05	107	11	30	0	56	10	0
CASSDRVEQYF	TCRBV13-03	TCRBJ02-07	107	0	17	14	21	55	0
CASSDTGGYEQYF	TCRBV13-03	TCRBJ02-07	107	0	26	0	66	15	0
CASSSGNSDYTF	TCRBV29-01	TCRBJ01-02	107	5	5	30	5	62	0
CAWSLEKADYTF	TCRBV31-01	TCRBJ01-02	107	0	0	0	0	0	107
CTCSADLGNYAEQFF	TCRBV01-01	TCRBJ02-01	107	5	0	0	6	45	51
CTCSADRGNSDYTF	TCRBV01-01	TCRBJ01-02	107	0	0	61	0	46	0
CASGDAGGQDTQYF	TCRBV13-02	TCRBJ02-05	106	14	19	26	10	31	6
CASGGTGYEQYF	TCRBV13-02	TCRBJ02-07	106	0	32	0	0	11	63
CASSLAGYEQYF	TCRBV16-01	TCRBJ02-07	106	0	0	0	0	25	81
CASSLGGYEQYF	TCRBV16-01	TCRBJ02-07	106	10	0	55	22	19	0
CASSLGYEQYF	TCRBV12-01	TCRBJ02-07	106	0	0	14	48	44	0
CASSLSQNTLYF	TCRBV16-01	TCRBJ02-04	106	12	0	19	56	19	0
CASSQDPNSGNTLYF	TCRBV02-01	TCRBJ01-03	106	13	0	0	38	55	0
CASSQDWGSYEQYF	TCRBV02-01	TCRBJ02-07	106	25	0	22	0	15	44
CASSQDWGYEQYF	TCRBV05-01	TCRBJ02-07	106	9	2	42	35	18	0
CASSSQGASAETLYF	TCRBV03-01	TCRBJ02-03	106	0	0	0	106	0	0
CTCSAGSYEQYF	TCRBV01-01	TCRBJ02-07	106	29	0	0	45	18	14
CASGDVEQYF	TCRBV13-02	TCRBJ02-07	105	18	0	12	55	0	20
CASSIGDEQYF	TCRBV19-01	TCRBJ02-07	105	10	0	0	19	43	33
CASSQTANSDYTF	TCRBV02-01	TCRBJ01-02	105	11	7	15	0	72	0
CASSRDRVNTEVFF	TCRBV17-01	TCRBJ01-01	105	0	0	0	0	105	0
CASSSTGDEQYF	TCRBV03-01	TCRBJ02-07	105	28	0	0	63	14	0
CTCSADWGVEQYF	TCRBV01-01	TCRBJ02-07	105	0	0	0	87	18	0
CASDRDISYEQYF	TCRBV13-02	TCRBJ02-07	104	0	0	0	0	104	0
CASGDARSGNTLYF	TCRBV13-02	TCRBJ01-03	104	17	87	0	0	0	0
CASSDWGGYAEQFF	TCRBV13-03	TCRBJ02-01	104	3	22	0	30	49	0
CASSIGGEQYF	TCRBV19-01	TCRBJ02-07	104	2	18	0	37	0	47
CASSLTGGYEQYF	TCRBV03-01	TCRBJ02-07	104	0	0	0	93	11	0
CASSQDSYEQYF	TCRBV05-01	TCRBJ02-07	104	0	41	31	0	12	20
CTCSADRSQNTLYF	TCRBV01-01	TCRBJ02-04	104	27	0	30	25	22	0
CTCSAGGSSYEQYF	TCRBV01-01	TCRBJ02-07	104	22	18	0	0	12	52
CASSFGLGGSYEQYF	TCRBV03-01	TCRBJ02-07	103	0	0	0	0	0	103
CASSLGGSGNTLYF	TCRBV03-01	TCRBJ01-03	103	7	8	0	0	49	39
CASSLSGNTLYF	TCRBV12-01	TCRBJ01-03	103	11	0	0	25	25	42
CASSLTGNSDYTF	TCRBV12-02	TCRBJ01-02	103	38	5	0	60	0	0
CASSQDGTGGYEQYF	TCRBV02-01	TCRBJ02-07	103	0	0	58	29	16	0
CAWSLGTGGYEQYF	TCRBV31-01	TCRBJ02-07	103	0	42	43	18	0	0
CTCSADGGDTQYF	TCRBV01-01	TCRBJ02-05	103	0	0	94	9	0	0
CASGDGGSYEQYF	TCRBV13-02	TCRBJ02-07	102	26	48	6	0	22	0
CASSQEGYEQYF	TCRBV05-01	TCRBJ02-07	102	0	0	57	0	25	20
CTCSAAGNTEVFF	TCRBV01-01	TCRBJ01-01	102	0	0	10	34	52	6
CASSLDRYEQYF	TCRBV12-01	TCRBJ02-07	101	0	0	37	19	18	27
CASSQDGGSAETLYF	TCRBV02-01	TCRBJ02-03	101	0	0	11	86	4	0
CASSQTGGEQYF	TCRBV05-01	TCRBJ02-07	101	12	0	12	49	28	0
CASSSLNRGTSDYTF	TCRBV16-01	TCRBJ01-02	101	0	0	101	0	0	0
CTCSAVINQAPLF	TCRBV01-01	TCRBJ01-05	101	0	0	0	0	0	101
CASGDWGEDTQYF	TCRBV13-02	TCRBJ02-05	100	4	0	0	13	55	28
CASGEGTGGYEQYF	TCRBV13-02	TCRBJ02-07	100	15	46	32	0	7	0
CASSLEGYEQYF	TCRBV12-02	TCRBJ02-07	100	0	47	3	6	27	17
CASSLGYEQYF	TCRBV12-02	TCRBJ02-07	100	0	3	70	15	12	0
CTCSASQNTLYF	TCRBV01-01	TCRBJ02-04	100	0	16	61	13	0	10
CASGDAETPYEQYF	TCRBV13-02	TCRBJ02-07	99	0	0	0	0	99	0
CASGDWGSSYEQYF	TCRBV13-02	TCRBJ02-07	99	6	5	10	64	0	14
CASSFGSSYEQYF	TCRBV14-01	TCRBJ02-07	99	12	0	42	45	0	0
CASSIGGSAETLYF	TCRBV19-01	TCRBJ02-03	99	0	0	33	52	14	0
CASSIQYEQYF	TCRBV19-01	TCRBJ02-07	99	24	26	14	12	19	4
CASSLGANSDYTF	TCRBV03-01	TCRBJ01-02	99	0	12	39	31	17	0
CASSLLGSSYEQYF	TCRBV03-01	TCRBJ02-07	99	0	24	61	0	0	14
CASSLSSYEQYF	TCRBV29-01	TCRBJ02-07	99	0	35	0	28	0	36
CASSQDVWGGYEQYF	TCRBV05-01	TCRBJ02-07	99	0	0	0	0	0	99
CASSQGGEQYF	TCRBV05-01	TCRBJ02-07	99	0	21	25	11	5	37
CAWRPGQGAFAETLYF	TCRBV31-01	TCRBJ02-03	99	0	0	0	0	0	99
CASSDQGANSDYTF	TCRBV13-01	TCRBJ01-02	98	6	0	0	47	45	0
CASSLDEQYF	TCRBV03-01	TCRBJ02-07	98	0	5	53	0	20	20
CASSLDEQYF	TCRBV12-02	TCRBJ02-07	98	19	10	23	46	0	0
CASSLDWGSYEQYF	TCRBV03-01	TCRBJ02-07	98	37	4	0	22	0	35
CAGDWGGLYF	TCRBV31-01	TCRBJ02-04	97	0	0	0	0	0	97
CASSLGNSDYTF	TCRBV12-01	TCRBJ01-02	97	12	25	22	0	0	38
CASSQEGGSSYEQYF	TCRBV02-01	TCRBJ02-07	97	29	0	29	0	0	39
CASSRDRGAETLYF	TCRBV17-01	TCRBJ02-03	97	0	35	7	0	0	55
CTCSAAGYEQYF	TCRBV01-01	TCRBJ02-07	97	26	45	0	0	26	0
CTCSAEGTGGYEQYF	TCRBV01-01	TCRBJ02-07	97	33	0	0	64	0	0
CTCSAGSSAETLYF	TCRBV01-01	TCRBJ02-03	97	34	34	7	0	22	0
CASGDRLGGYEQYF	TCRBV13-02	TCRBJ02-07	96	15	23	0	35	23	0
CASGRGQYEQYF	TCRBV13-02	TCRBJ02-07	96	96	0	0	0	0	0
CASSDGEQYF	TCRBV13-03	TCRBJ02-07	96	0	4	0	76	16	0
CASSFRGSYEQYF	TCRBV03-01	TCRBJ02-07	96	65	0	0	31	0	0
CASSLASANSDYTF	TCRBV03-01	TCRBJ01-02	96	0	0	0	0	0	96
CASSLGGENTLYF	TCRBV16-01	TCRBJ02-04	96	0	0	0	96	0	0
CASSSDRYEQYF	TCRBV03-01	TCRBJ02-07	96	0	21	0	28	0	47
CASSSGDEQYF	TCRBV29-01	TCRBJ02-07	96	0	0	5	43	28	20
CASSSGYEQYF	TCRBV29-01	TCRBJ02-07	96	0	0	0	86	10	0
CTCSADGYEQYF	TCRBV01-01	TCRBJ02-07	96	0	0	0	52	44	0
CTCSAGEQYF	TCRBV01-01	TCRBJ02-07	96	8	39	0	49	0	0
CASGDAGDEQYF	TCRBV13-02	TCRBJ02-07	95	0	8	0	68	19	0
CASGDAGSYEQYF	TCRBV13-02	TCRBJ02-07	95	0	46	0	31	18	0
CASGDAWEQYF	TCRBV13-02	TCRBJ02-07	95	4	16	0	49	26	0
CASSQDWGGSYEQYF	TCRBV05-01	TCRBJ02-07	95	2	29	0	25	39	0
CASSSGGSSYEQYF	TCRBV29-01	TCRBJ02-07	95	73	0	0	22	0	0
CASSSGGSSYEQYF	TCRBV03-01	TCRBJ02-07	95	40	11	0	44	0	0
CASSSSYEQYF	TCRBV16-01	TCRBJ02-07	95	33	32	0	16	14	0
CAWSLQNSDYTF	TCRBV31-01	TCRBJ01-02	95	37	0	0	0	0	58
CTCSADGVEQYF	TCRBV01-01	TCRBJ02-07	95	0	0	60	0	35	0
CASSDGDSYEQYF	TCRBV13-01	TCRBJ02-07	94	0	0	77	17	0	0
CASSIRNTEVFF	TCRBV19-01	TCRBJ01-01	94	0	8	8	21	54	3
CASSLDGNSPLYF	TCRBV04-01	TCRBJ01-06	94	0	0	0	94	0	0
CASGDAWGVSSYEQYF	TCRBV13-02	TCRBJ02-07	93	0	0	0	93	0	0
CASSDVEQYF	TCRBV13-01	TCRBJ02-07	93	0	29	25	39	0	0
CASSDVGYEQYF	TCRBV13-03	TCRBJ02-07	93	0	0	34	0	59	0
CASSLDNYEQYF	TCRBV12-01	TCRBJ02-07	93	0	0	40	0	8	45
CASSLEGGNTEVFF	TCRBV03-01	TCRBJ01-01	93	9	9	57	18	0	0
CASSLGTGGYEQYF	TCRBV14-01	TCRBJ02-07	93	19	0	27	47	0	0
CASSLVGDEQYF	TCRBV03-01	TCRBJ02-07	93	0	25	18	46	4	0
CASSQDRNSGNTLYF	TCRBV02-01	TCRBJ01-03	93	17	10	53	13	0	0
CASSQTDSGNTLYF	TCRBV05-01	TCRBJ01-03	93	17	0	0	69	7	0
CASSSYEQYF	TCRBV29-01	TCRBJ02-07	93	0	0	0	93	0	0
CTCSADRGGEQYF	TCRBV01-01	TCRBJ02-07	93	0	60	0	15	18	0
CTCSAGISNERLFF	TCRBV01-01	TCRBJ01-04	93	9	8	60	7	9	0
CTCSGTGETLYF	TCRBV01-01	TCRBJ02-03	93	0	31	0	62	0	0
CASGDWEQYF	TCRBV13-02	TCRBJ02-07	92	23	0	0	0	22	47
CASSARRGEVFF	TCRBV13-01	TCRBJ01-01	92	0	0	0	0	0	92
CASSLGQAETLYF	TCRBV16-01	TCRBJ02-03	92	0	0	0	92	0	0
CASSLQGVDTEVFF	TCRBV05-01	TCRBJ01-01	92	0	0	0	0	0	92
CASSLVGYEQYF	TCRBV03-01	TCRBJ02-07	92	0	0	32	23	0	37
CASSQGQYEQYF	TCRBV02-01	TCRBJ02-07	92	0	62	0	15	15	0
CASSQGTGGYEQYF	TCRBV02-01	TCRBJ02-07	92	34	0	27	16	15	0
CTCSADTEVFF	TCRBV01-01	TCRBJ01-01	92	0	0	22	0	26	44
CTCSADWTSYAEQFF	TCRBV01-01	TCRBJ02-01	92	0	0	0	92	0	0
CASSDVGYEQYF	TCRBV13-01	TCRBJ02-07	91	11	24	0	56	0	0
CASSESAETLYF	TCRBV13-03	TCRBJ02-03	91	0	0	0	0	5	86
CASSQDRGYEQYF	TCRBV05-01	TCRBJ02-07	91	0	4	41	46	0	0
CASSSTGYEQYF	TCRBV03-01	TCRBJ02-07	91	16	37	0	34	4	0
CTCSAAGSEQYF	TCRBV01-01	TCRBJ02-07	91	0	0	0	0	25	66
CTCSADAEQFF	TCRBV01-01	TCRBJ02-01	91	45	0	35	11	0	0
CTCSAGTTSAETLYF	TCRBV01-01	TCRBJ02-03	91	26	41	24	0	0	0
CASSGGSQNTLYF	TCRBV13-01	TCRBJ02-04	90	0	0	0	27	58	5
CASSLEGDEQYF	TCRBV03-01	TCRBJ02-07	90	0	43	0	0	9	38
CASSLGDSYEQYF	TCRBV12-01	TCRBJ02-07	90	16	5	13	56	0	0
CASSPDSYEQYF	TCRBV15-01	TCRBJ02-07	90	13	0	0	77	0	0
CASSPDWGGYEQYF	TCRBV04-01	TCRBJ02-07	90	8	19	0	0	26	37
CASSPGGYEQYF	TCRBV03-01	TCRBJ02-07	90	0	23	46	0	21	0
CASSQGTGGNTGQLYF	TCRBV02-01	TCRBJ02-02	90	5	0	18	62	5	0
CTCSADTGNTLYF	TCRBV01-01	TCRBJ01-03	90	0	22	0	0	0	68
CTCSVDRYEQYF	TCRBV01-01	TCRBJ02-07	90	0	54	0	0	36	0
CASGDAGDSDYTF	TCRBV13-02	TCRBJ01-02	89	31	4	31	0	23	0
CASGDGTGGNSDYTF	TCRBV13-02	TCRBJ01-02	89	0	23	0	0	0	66
CASGSYEQYF	TCRBV13-02	TCRBJ02-07	89	6	4	10	34	35	0
CASSDGGEQYF	TCRBV13-03	TCRBJ02-07	89	0	0	0	0	11	78
CASSEGGSYEQYF	TCRBV13-03	TCRBJ02-07	89	12	0	58	0	19	0
CASSLDKYEQYF	TCRBV03-01	TCRBJ02-07	89	12	0	19	0	0	58
CASSLGGGAETLYF	TCRBV16-01	TCRBJ02-03	89	5	5	42	28	0	9
CASSQYEQYF	TCRBV04-01	TCRBJ02-07	89	47	0	13	11	18	0
CTCSADPRDIYEQYF	TCRBV01-01	TCRBJ02-07	89	0	0	0	0	89	0
CTCSAVGYEQYF	TCRBV01-01	TCRBJ02-07	89	0	26	0	0	63	0
CASGDAGDTQYF	TCRBV13-02	TCRBJ02-05	88	24	35	0	0	29	0
CASGDAGGNYAEQFF	TCRBV13-02	TCRBJ02-01	88	18	0	12	34	8	16
CASSDRGDNQAPLF	TCRBV13-03	TCRBJ01-05	88	0	32	14	28	0	14
CASSPGQYAEQFF	TCRBV05-01	TCRBJ02-01	88	4	15	32	37	0	0
CASSPGQYNSPLYF	TCRBV19-01	TCRBJ01-06	88	0	4	4	0	59	21
CASSQGATTNTEVFF	TCRBV02-01	TCRBJ01-01	88	0	0	0	88	0	0
CAWSLTGGYEQYF	TCRBV31-01	TCRBJ02-07	88	26	0	0	8	18	36
CTCSASYNNQAPLF	TCRBV01-01	TCRBJ01-05	88	0	17	0	0	0	71
CASGELGGYEQYF	TCRBV13-02	TCRBJ02-07	87	0	13	20	0	34	20
CASGGDRAGNTLYF	TCRBV13-02	TCRBJ01-03	87	8	16	16	47	0	0
CASSDSAETLYF	TCRBV13-03	TCRBJ02-03	87	0	9	0	12	36	30
CASSGDWGVEQYF	TCRBV15-01	TCRBJ02-07	87	0	0	0	87	0	0
CASSLAISNERLFF	TCRBV03-01	TCRBJ01-04	87	0	0	0	31	56	0
CASSLSGGTGNSDYTF	TCRBV29-01	TCRBJ01-02	87	0	0	87	0	0	0
CASSPRNTEVFF	TCRBV02-01	TCRBJ01-01	87	0	0	87	0	0	0
CASSQDFLGGRREQYF	TCRBV05-01	TCRBJ02-07	87	0	0	0	0	0	87
CASSQDNSGNTLYF	TCRBV05-01	TCRBJ01-03	87	10	31	10	30	6	0
CASSQDNSGNTLYF	TCRBV02-01	TCRBJ01-03	87	0	45	0	0	18	24
CASSSGTGGYEQYF	TCRBV16-01	TCRBJ02-07	87	0	26	23	0	16	22
CAWTRTHTGQLYF	TCRBV31-01	TCRBJ02-02	87	0	0	0	87	0	0
CGARDWGNTGQLYF	TCRBV20-01	TCRBJ02-02	87	6	6	6	0	69	0
CTCSAGQNYAEQFF	TCRBV01-01	TCRBJ02-01	87	0	0	0	69	18	0
CTCSAGTGNQAPLF	TCRBV01-01	TCRBJ01-05	87	0	0	51	0	36	0
CTCSARDWGYEQYF	TCRBV01-01	TCRBJ02-07	87	0	0	0	21	66	0
CTCSGSAETLYF	TCRBV01-01	TCRBJ02-03	87	7	0	0	56	24	0
CASGDAREQYF	TCRBV13-02	TCRBJ02-07	86	12	4	19	25	0	26
CASKGGGDTQYF	TCRBV19-01	TCRBJ02-05	86	0	0	86	0	0	0
CASSAGQGASYEQYF	TCRBV13-01	TCRBJ02-07	86	0	0	86	0	0	0
CASSIRGYEQYF	TCRBV19-01	TCRBJ02-07	86	8	10	0	49	19	0
CASSLGGSYEQYF	TCRBV03-01	TCRBJ02-07	86	11	0	11	19	0	45
CASSLGQYEQYF	TCRBV16-01	TCRBJ02-07	86	3	64	15	0	0	4
CASSPGQYEQYF	TCRBV12-01	TCRBJ02-07	86	0	0	0	0	16	70
CASSQANSDYTF	TCRBV04-01	TCRBJ01-02	86	0	0	16	70	0	0
CASSQDGDSGNTLYF	TCRBV02-01	TCRBJ01-03	86	0	0	0	86	0	0
CASSSTATGQLYF	TCRBV04-01	TCRBJ02-02	86	86	0	0	0	0	0
CAWSLLGGYEQYF	TCRBV31-01	TCRBJ02-07	86	0	0	24	62	0	0
CTCSAGNYAEQFF	TCRBV01-01	TCRBJ02-01	86	0	44	0	35	7	0
CASSDAGGENTLYF	TCRBV13-03	TCRBJ02-04	85	0	0	0	36	0	49
CASSDNYEQYF	TCRBV13-01	TCRBJ02-07	85	25	35	0	5	20	0
CASSIKGSGNTLYF	TCRBV19-01	TCRBJ01-03	85	0	7	0	41	11	26
CASSLAGTSYEQYF	TCRBV03-01	TCRBJ02-07	85	0	0	0	0	0	85
CASSLEGDAETLYF	TCRBV12-02	TCRBJ02-03	85	0	0	85	0	0	0
CASSLGISNERLFF	TCRBV03-01	TCRBJ01-04	85	0	0	0	37	26	22
CASSPGQGNSDYTF	TCRBV29-01	TCRBJ01-02	85	0	0	19	42	24	0
CASSQRVYEQYF	TCRBV16-01	TCRBJ02-07	85	0	0	0	0	85	0
CGARDSSGNTLYF	TCRBV20-01	TCRBJ01-03	85	4	0	13	14	0	54
CGARESAGNTEVFF	TCRBV20-01	TCRBJ01-01	85	0	0	0	85	0	0
CTCSADRGEQYF	TCRBV01-01	TCRBJ02-07	85	20	0	0	0	65	0
CTCSAETGGYEQYF	TCRBV01-01	TCRBJ02-07	85	0	0	0	18	67	0
CTCSAPGQGAETLYF	TCRBV01-01	TCRBJ02-03	85	0	0	22	0	63	0
CASGDWGSYEQYF	TCRBV13-02	TCRBJ02-07	84	27	27	0	0	30	0
CASGETANSDYTF	TCRBV13-02	TCRBJ01-02	84	0	6	26	37	0	15
CASGGTFNTGQLYF	TCRBV13-02	TCRBJ02-02	84	0	0	84	0	0	0
CASSDGSSYEQYF	TCRBV13-01	TCRBJ02-07	84	0	0	0	57	0	27
CASSGDSDYTF	TCRBV29-01	TCRBJ01-02	84	20	0	0	64	0	0
CASSLDWGNYAEQFF	TCRBV12-01	TCRBJ02-01	84	0	45	0	12	0	27
CASSLGGSSYEQYF	TCRBV15-01	TCRBJ02-07	84	16	0	12	56	0	0
CASSLLGGYEQYF	TCRBV03-01	TCRBJ02-07	84	0	0	0	60	24	0
CASSLVQYEQYF	TCRBV03-01	TCRBJ02-07	84	0	0	0	0	0	84
CASSQDRVEQYF	TCRBV02-01	TCRBJ02-07	84	29	30	0	25	0	0
CASGDAYNSPLYF	TCRBV13-02	TCRBJ01-06	83	0	0	75	0	8	0
CASSDAGGAETLYF	TCRBV13-01	TCRBJ02-03	83	6	28	21	24	4	0
CASSHRDWGYEQYF	TCRBV04-01	TCRBJ02-07	83	0	53	0	0	0	30
CASSLEANSDYTF	TCRBV12-01	TCRBJ01-02	83	0	0	34	18	31	0
CASSLGGNTGQLYF	TCRBV03-01	TCRBJ02-02	83	10	5	8	0	36	24
CASSLGGSDYTF	TCRBV12-01	TCRBJ01-02	83	11	6	0	19	22	25
CASSLNTGQLYF	TCRBV12-02	TCRBJ02-02	83	0	0	0	0	45	38
CASSLTGGNTGQLYF	TCRBV12-01	TCRBJ02-02	83	0	0	31	0	0	52
CASSQEGGYEQYF	TCRBV05-01	TCRBJ02-07	83	13	27	17	26	0	0
CASSRYEQYF	TCRBV04-01	TCRBJ02-07	83	18	0	9	40	16	0
CATDWGNYAEQFF	TCRBV13-01	TCRBJ02-01	83	0	0	83	0	0	0
CTCSADRANTGQLYF	TCRBV01-01	TCRBJ02-02	83	0	6	0	0	0	77
CTCSADSRLGYNYAEQFF	TCRBV01-01	TCRBJ02-01	83	0	0	0	0	0	83
CTCSAETSQNTLYF	TCRBV01-01	TCRBJ02-04	83	0	0	0	0	0	83
CTCSAGDTQYF	TCRBV01-01	TCRBJ02-05	83	9	25	10	8	3	28
CTCSAGGVEQYF	TCRBV01-01	TCRBJ02-07	83	28	0	0	33	0	22
CTCSAGNSGNTLYF	TCRBV01-01	TCRBJ01-03	83	13	33	0	0	37	0
CTCSATGGEQYF	TCRBV01-01	TCRBJ02-07	83	9	0	0	0	0	74
CASGDRLGGREQYF	TCRBV13-02	TCRBJ02-07	82	0	30	25	0	0	27
CASGGNTGQLYF	TCRBV13-02	TCRBJ02-02	82	0	0	16	0	26	40
CASSGGYEQYF	TCRBV13-03	TCRBJ02-07	82	0	13	24	5	0	40
CASSLDAEQFF	TCRBV03-01	TCRBJ02-01	82	14	4	11	48	5	0
CASSLEGNSDYTF	TCRBV15-01	TCRBJ01-02	82	0	0	0	0	82	0
CASSLGSQNTLYF	TCRBV03-01	TCRBJ02-04	82	0	32	14	4	0	32
CASSQDSYEQYF	TCRBV02-01	TCRBJ02-07	82	0	4	51	27	0	0
CASSQEGGDSYEQYF	TCRBV02-01	TCRBJ02-07	82	0	0	62	0	0	20
CASSRDSYAEQFF	TCRBV03-01	TCRBJ02-01	82	0	0	82	0	0	0
CAWRGNSGNTLYF	TCRBV31-01	TCRBJ01-03	82	0	9	0	73	0	0
CAWSLRGSGNTLYF	TCRBV31-01	TCRBJ01-03	82	0	59	23	0	0	0
CGARDRAGNTLYF	TCRBV20-01	TCRBJ01-03	82	23	21	4	34	0	0
CGARLGYEQYF	TCRBV20-01	TCRBJ02-07	82	0	0	0	20	11	51
CTCSADSGNTLYF	TCRBV01-01	TCRBJ01-03	82	27	7	5	28	15	0
CTCSAERGYEQYF	TCRBV01-01	TCRBJ02-07	82	0	0	0	82	0	0
CTCSAGGSYEQYF	TCRBV01-01	TCRBJ02-07	82	0	31	22	0	11	18
CASSDAGFSNERLFF	TCRBV13-01	TCRBJ01-04	81	13	0	0	0	11	57
CASSITGGYEQYF	TCRBV19-01	TCRBJ02-07	81	0	32	10	0	9	30
CASSLGQNQAPLF	TCRBV16-01	TCRBJ01-05	81	0	0	0	32	0	49
CASSLGSYEQYF	TCRBV15-01	TCRBJ02-07	81	0	32	0	0	10	39
CASSLSYEQYF	TCRBV03-01	TCRBJ02-07	81	19	30	0	0	32	0
CASSQQANSDYTF	TCRBV02-01	TCRBJ01-02	81	7	36	0	38	0	0
CASSRTAANSDYTF	TCRBV29-01	TCRBJ01-02	81	0	0	0	0	0	81
CASSTGNTLYF	TCRBV12-02	TCRBJ01-03	81	0	0	0	78	0	3
CTCSADGGAGEQYF	TCRBV01-01	TCRBJ02-07	81	16	0	0	47	18	0
CTCSAEGRGAETLYF	TCRBV01-01	TCRBJ02-03	81	0	0	18	0	0	63
CTCSAGQISNERLFF	TCRBV01-01	TCRBJ01-04	81	9	4	0	24	24	20
CTCSAGRSSYEQYF	TCRBV01-01	TCRBJ02-07	81	0	0	43	38	0	0
CASGDARTGGYEQYF	TCRBV13-02	TCRBJ02-07	80	19	0	0	30	10	21
CASSDAGQGYEQYF	TCRBV13-01	TCRBJ02-07	80	26	0	54	0	0	0
CASSDAGVSYEQYF	TCRBV13-01	TCRBJ02-07	80	0	43	0	0	37	0
CASSDNTEVFF	TCRBV13-01	TCRBJ01-01	80	12	0	0	0	20	48
CASSLDREGEQYF	TCRBV03-01	TCRBJ02-07	80	0	26	0	38	16	0
CASSLGGANSDYTF	TCRBV03-01	TCRBJ01-02	80	0	15	9	23	33	0
CASSLGNSGNTLYF	TCRBV12-01	TCRBJ01-03	80	0	0	30	0	50	0
CASSLGYEQYF	TCRBV16-01	TCRBJ02-07	80	0	14	0	0	17	49
CASSQDYEQYF	TCRBV02-01	TCRBJ02-07	80	23	10	0	47	0	0
CASSSGTGGYEQYF	TCRBV19-01	TCRBJ02-07	80	6	0	0	52	22	0
CASSSQGAGNTLYF	TCRBV03-01	TCRBJ01-03	80	10	0	11	0	4	55
CASSSRVDNQAPLF	TCRBV16-01	TCRBJ01-05	80	0	0	0	0	0	80
CASSSSYEQYF	TCRBV17-01	TCRBJ02-07	80	0	0	28	35	17	0
CTCSADPRDGNQAPLF	TCRBV01-01	TCRBJ01-05	80	0	0	0	80	0	0
CTCSADWGYEQYF	TCRBV01-01	TCRBJ02-07	80	0	0	0	57	23	0
CTCSAGAGRAETLYF	TCRBV01-01	TCRBJ02-03	80	0	0	0	0	0	80
CTCSAGQNTGQLYF	TCRBV01-01	TCRBJ02-02	80	0	80	0	0	0	0
CTCSAGTISNERLFF	TCRBV01-01	TCRBJ01-04	80	34	0	0	13	33	0
CTCSDSYEQYF	TCRBV01-01	TCRBJ02-07	80	0	0	80	0	0	0
CASGDAGISNERLFF	TCRBV13-02	TCRBJ01-04	79	12	2	8	21	36	0
CASGDAGQGYEQYF	TCRBV13-02	TCRBJ02-07	79	45	34	0	0	0	0
CASGDAGSSGNTLYF	TCRBV13-02	TCRBJ01-03	79	0	0	16	37	26	0
CASGDARYEQYF	TCRBV13-02	TCRBJ02-07	79	14	25	0	16	24	0
CASGGTANSDYTF	TCRBV13-02	TCRBJ01-02	79	24	4	0	38	4	9
CASSDAYEQYF	TCRBV13-03	TCRBJ02-07	79	16	0	0	12	51	0
CASSIDSGNTLYF	TCRBV19-01	TCRBJ01-03	79	0	42	0	18	19	0
CASSLTGGAREQYF	TCRBV03-01	TCRBJ02-07	79	0	33	21	0	25	0
CASSQDRNSDYTF	TCRBV02-01	TCRBJ01-02	79	0	12	0	31	10	26
CTCSADSSQNTLYF	TCRBV01-01	TCRBJ02-04	79	0	0	0	26	0	53
CTCSATGNSDYTF	TCRBV01-01	TCRBJ01-02	79	0	64	15	0	0	0
CASGDAGNQAPLF	TCRBV13-02	TCRBJ01-05	78	35	0	0	27	0	16
CASGDAGVEQYF	TCRBV13-02	TCRBJ02-07	78	14	10	6	40	0	8
CASSDGFNQDTQYF	TCRBV13-01	TCRBJ02-05	78	0	0	0	0	78	0
CASSLGGALEQYF	TCRBV12-01	TCRBJ02-07	78	0	23	10	12	33	0
CASSPANTGQLYF	TCRBV04-01	TCRBJ02-02	78	10	23	22	23	0	0
CASSPGLGGYEQYF	TCRBV12-01	TCRBJ02-07	78	11	0	26	0	10	31
CASSQDWGYEQYF	TCRBV02-01	TCRBJ02-07	78	0	0	54	9	0	15
CASTRDRGSYEQYF	TCRBV19-01	TCRBJ02-07	78	0	0	0	0	0	78
CAWSLGNSGNTLYF	TCRBV31-01	TCRBJ01-03	78	13	0	0	43	16	6
CAWSSWGQDTQYF	TCRBV31-01	TCRBJ02-05	78	0	78	0	0	0	0
CTCSADRAWGAEQFF	TCRBV01-01	TCRBJ02-01	78	0	0	0	0	0	78
CTCSADRNTGQLYF	TCRBV01-01	TCRBJ02-02	78	12	0	4	43	19	0
CTCSAGGAGAETLYF	TCRBV01-01	TCRBJ02-03	78	17	31	0	21	9	0
CTCSASQGSYEQYF	TCRBV01-01	TCRBJ02-07	78	0	0	0	0	0	78
CTCSPGTVNNQAPLF	TCRBV01-01	TCRBJ01-05	78	0	0	0	0	0	78
CASGENERLFF	TCRBV13-02	TCRBJ01-04	77	14	29	12	0	0	22
CASRQGYEQYF	TCRBV29-01	TCRBJ02-07	77	0	0	0	44	33	0
CASSIGGGEQYF	TCRBV19-01	TCRBJ02-07	77	6	0	18	25	0	28
CASSLGDTQYF	TCRBV12-01	TCRBJ02-05	77	0	20	19	10	0	28
CASSLGGPYEQYF	TCRBV16-01	TCRBJ02-07	77	0	0	0	0	12	65
CASSLTSNSDYTF	TCRBV12-01	TCRBJ01-02	77	20	18	0	39	0	0
CASSQDWGSAETLYF	TCRBV02-01	TCRBJ02-03	77	0	0	0	0	30	47
CASSQQGAGNNQAPLF	TCRBV02-01	TCRBJ01-05	77	0	0	0	0	0	77
CASSSDSYEQYF	TCRBV04-01	TCRBJ02-07	77	0	0	24	0	14	39
CTCSAEDSGNTLYF	TCRBV01-01	TCRBJ01-03	77	0	0	0	27	0	50
CTCSGGQNQAPLF	TCRBV01-01	TCRBJ01-05	77	0	0	0	77	0	0
CTCSGRDKNTLYF	TCRBV01-01	TCRBJ02-04	77	0	0	0	77	0	0
CASGDWGGSYEQYF	TCRBV13-02	TCRBJ02-07	76	18	0	9	17	32	0
CASSDWGSAETLYF	TCRBV13-03	TCRBJ02-03	76	19	0	14	33	10	0
CASSGQYEQYF	TCRBV13-03	TCRBJ02-07	76	26	35	0	0	15	0
CASSLGGTYEQYF	TCRBV16-01	TCRBJ02-07	76	0	31	0	45	0	0
CASSLGTGDEQYF	TCRBV29-01	TCRBJ02-07	76	15	24	0	37	0	0
CASSLGTNSDYTF	TCRBV12-01	TCRBJ01-02	76	13	13	15	0	6	29
CASSLSYEQYF	TCRBV12-01	TCRBJ02-07	76	0	0	0	18	26	32
CASSPGTGGYEQYF	TCRBV05-01	TCRBJ02-07	76	26	12	15	0	13	10
CASSPGTGYEQYF	TCRBV03-01	TCRBJ02-07	76	7	0	0	33	36	0
CASSPLGGRGAETLYF	TCRBV19-01	TCRBJ02-03	76	0	0	0	47	29	0
CASSPLGYEQYF	TCRBV03-01	TCRBJ02-07	76	0	34	0	0	42	0
CASSQGPSNERLFF	TCRBV02-01	TCRBJ01-04	76	0	76	0	0	0	0
CAWSLGNTLYF	TCRBV31-01	TCRBJ01-03	76	0	10	0	0	13	53
CGARDGGGEQYF	TCRBV20-01	TCRBJ02-07	76	21	0	0	36	19	0
CTCSAGTGGNTGQLYF	TCRBV01-01	TCRBJ02-02	76	12	10	0	0	54	0
CTCSARQGSYEQYF	TCRBV01-01	TCRBJ02-07	76	11	58	0	0	7	0
CTCSATDYAEQFF	TCRBV01-01	TCRBJ02-01	76	0	0	0	0	0	76
CTCSAVYNNQAPLF	TCRBV01-01	TCRBJ01-05	76	0	0	0	0	76	0
CASGDATYEQYF	TCRBV13-02	TCRBJ02-07	75	10	6	0	43	16	0
CASGDWGGEQYF	TCRBV13-02	TCRBJ02-07	75	10	27	12	13	13	0
CASSDGSYEQYF	TCRBV13-01	TCRBJ02-07	75	0	3	21	0	12	39
CASSDRGQYEQYF	TCRBV13-01	TCRBJ02-07	75	0	0	0	75	0	0
CASSIGQYEQYF	TCRBV19-01	TCRBJ02-07	75	4	0	0	0	36	35
CASSLVNSDYTF	TCRBV03-01	TCRBJ01-02	75	0	26	10	39	0	0
CASSPGLGGYEQYF	TCRBV04-01	TCRBJ02-07	75	0	33	22	20	0	0
CASSQDLGGYEQYF	TCRBV02-01	TCRBJ02-07	75	0	0	0	41	0	34
CASSQDSAETLYF	TCRBV02-01	TCRBJ02-03	75	17	13	0	19	0	26
CASSQDSSGNTLYF	TCRBV05-01	TCRBJ01-03	75	11	34	0	11	19	0
CASSSAETLYF	TCRBV19-01	TCRBJ02-03	75	8	0	46	0	0	21
CASSSGLGAYEQYF	TCRBV04-01	TCRBJ02-07	75	19	0	0	56	0	0
CASSWGSTGQLYF	TCRBV04-01	TCRBJ02-02	75	0	75	0	0	0	0
CTCSAEGYEQYF	TCRBV01-01	TCRBJ02-07	75	30	4	0	41	0	0
CTCSAGDSDYTF	TCRBV01-01	TCRBJ01-02	75	0	15	0	60	0	0
CTCSAGVSNERLFF	TCRBV01-01	TCRBJ01-04	75	5	0	0	0	5	65
CTCSANNQAPLF	TCRBV01-01	TCRBJ01-05	75	0	3	0	0	72	0
CTCSAQFSNERLFF	TCRBV01-01	TCRBJ01-04	75	0	0	33	0	0	42
CTCTGVGNTLYF	TCRBV01-01	TCRBJ01-03	75	0	0	0	0	0	75
CASGDLGYEQYF	TCRBV13-02	TCRBJ02-07	74	28	14	4	0	28	0
CASSFGANSDYTF	TCRBV03-01	TCRBJ01-02	74	0	15	15	28	16	0
CASSLARPAETLYF	TCRBV14-01	TCRBJ02-03	74	0	0	0	0	74	0
CASSLLGGSYEQYF	TCRBV03-01	TCRBJ02-07	74	17	0	24	16	17	0
CASSLQGNSDYTF	TCRBV03-01	TCRBJ01-02	74	4	0	0	43	0	27
CASSLTGGALEQYF	TCRBV03-01	TCRBJ02-07	74	0	0	0	74	0	0
CASSLVGGYEQYF	TCRBV16-01	TCRBJ02-07	74	0	0	0	53	21	0
CASSQERNTGQLYF	TCRBV02-01	TCRBJ02-02	74	0	0	0	0	74	0
CASSSGQSSYEQYF	TCRBV03-01	TCRBJ02-07	74	0	36	0	0	21	17
CASSVNNQAPLF	TCRBV13-01	TCRBJ01-05	74	0	0	74	0	0	0
CAWSLGGSAETLYF	TCRBV31-01	TCRBJ02-03	74	13	0	30	0	0	31
CTCSADRGRGNTLYF	TCRBV01-01	TCRBJ01-03	74	0	17	7	0	15	35
CTCSADRMGGLEQYF	TCRBV01-01	TCRBJ02-07	74	0	0	0	0	0	74
CTCSAGVGNTLYF	TCRBV01-01	TCRBJ01-03	74	6	0	0	0	0	68
CTCSGKEVFF	TCRBV01-01	TCRBJ01-01	74	0	0	6	54	0	14
CASGDGLGGYEQYF	TCRBV13-02	TCRBJ02-07	73	0	0	6	17	19	31
CASGGGSSYEQYF	TCRBV13-02	TCRBJ02-07	73	6	0	37	30	0	0
CASRRYAETLYF	TCRBV13-01	TCRBJ02-03	73	0	0	0	0	0	73
CASSDRGYEQYF	TCRBV13-01	TCRBJ02-07	73	15	0	0	54	4	0
CASSLGSYEQYF	TCRBV03-01	TCRBJ02-07	73	29	17	0	27	0	0
CASSLNTGQLYF	TCRBV15-01	TCRBJ02-02	73	0	0	12	14	14	33
CASSQDWGSQNTLYF	TCRBV02-01	TCRBJ02-04	73	6	0	0	50	13	4
CASSQEGRGNERLFF	TCRBV02-01	TCRBJ01-04	73	0	0	73	0	0	0
CASSSSYEQYF	TCRBV03-01	TCRBJ02-07	73	0	0	0	11	21	41
CTCSADDEQYF	TCRBV01-01	TCRBJ02-07	73	0	38	35	0	0	0
CTCSADEQYF	TCRBV01-01	TCRBJ02-07	73	52	0	21	0	0	0
CTCSATANSDYTF	TCRBV01-01	TCRBJ01-02	73	0	0	0	59	14	0
CTCSGTGGYEQYF	TCRBV01-01	TCRBJ02-07	73	0	0	0	22	51	0
CASGDWGVEQYF	TCRBV13-02	TCRBJ02-07	72	14	0	23	16	19	0
CASSDRDWGYEQYF	TCRBV13-01	TCRBJ02-07	72	0	24	0	27	21	0
CASSGGYEQYF	TCRBV13-01	TCRBJ02-07	72	6	0	0	66	0	0
CASSLDWGAEQYF	TCRBV16-01	TCRBJ02-07	72	0	0	37	0	0	35
CASSLGGSDYTF	TCRBV03-01	TCRBJ01-02	72	0	26	0	25	21	0
CASSLGGSSYEQYF	TCRBV03-01	TCRBJ02-07	72	9	5	20	0	38	0
CASSLGISNERLFF	TCRBV29-01	TCRBJ01-04	72	4	0	0	0	12	56
CASSPDKYEQYF	TCRBV16-01	TCRBJ02-07	72	0	23	23	0	0	26
CASSPDSSGNTLYF	TCRBV12-01	TCRBJ01-03	72	6	11	0	44	7	4
CASSPNTGQLYF	TCRBV16-01	TCRBJ02-02	72	0	0	0	28	11	33
CASSQDWGAYEQYF	TCRBV05-01	TCRBJ02-07	72	18	0	0	22	19	13
CASSQEGGNTGQLYF	TCRBV02-01	TCRBJ02-02	72	0	0	27	0	0	45
CASSTGGDTQYF	TCRBV04-01	TCRBJ02-05	72	0	0	72	0	0	0
CTCSAGGRDEQYF	TCRBV01-01	TCRBJ02-07	72	0	0	0	22	50	0
CTCSAGLGSAETLYF	TCRBV01-01	TCRBJ02-03	72	0	0	37	0	0	35
CTCSAGSSGNTLYF	TCRBV01-01	TCRBJ01-03	72	19	0	9	44	0	0
CTCSGTVSNERLFF	TCRBV01-01	TCRBJ01-04	72	26	0	19	20	7	0
CTCSRPTGGAYEQYF	TCRBV01-01	TCRBJ02-07	72	0	0	0	0	0	72
CASAPGQANSDYTF	TCRBV13-02	TCRBJ01-02	71	0	0	0	0	71	0
CASGDSYNSPLYF	TCRBV13-02	TCRBJ01-06	71	6	10	13	21	0	21
CASSDAGGSAETLYF	TCRBV13-01	TCRBJ02-03	71	4	4	18	24	21	0
CASSDRGNNQAPLF	TCRBV13-03	TCRBJ01-05	71	0	0	6	25	18	22
CASSDRGSAETLYF	TCRBV13-03	TCRBJ02-03	71	18	0	0	20	0	33
CASSFDEQYF	TCRBV03-01	TCRBJ02-07	71	0	35	0	0	36	0
CASSLDGGAGEQYF	TCRBV03-01	TCRBJ02-07	71	0	20	0	31	20	0
CASSLEGNSDYTF	TCRBV12-01	TCRBJ01-02	71	19	0	0	5	16	31
CASSLGNYEQYF	TCRBV16-01	TCRBJ02-07	71	0	0	34	0	37	0
CASSLGTASYEQYF	TCRBV12-02	TCRBJ02-07	71	0	0	0	71	0	0
CASSLGTGGAETLYF	TCRBV03-01	TCRBJ02-03	71	0	0	19	25	11	16
CASSLRGGEQYF	TCRBV16-01	TCRBJ02-07	71	0	0	0	0	0	71
CASSLTGGAETLYF	TCRBV04-01	TCRBJ02-03	71	0	0	71	0	0	0
CASSPGTGGYEQYF	TCRBV04-01	TCRBJ02-07	71	30	6	11	0	24	0
CASSPTGGPYEQYF	TCRBV03-01	TCRBJ02-07	71	0	0	20	51	0	0
CASSQDRAGGNQAPLF	TCRBV02-01	TCRBJ01-05	71	0	0	0	0	71	0
CASSQDRDSDYTF	TCRBV02-01	TCRBJ01-02	71	0	0	0	43	0	28
CASSQGGNTEVFF	TCRBV05-01	TCRBJ01-01	71	16	0	0	0	0	55
CASSSQGSGNTLYF	TCRBV03-01	TCRBJ01-03	71	21	27	0	0	23	0
CAWSLGGYEQYF	TCRBV31-01	TCRBJ02-07	71	16	0	23	0	20	12
CTCSADKANSDYTF	TCRBV01-01	TCRBJ01-02	71	0	40	31	0	0	0
CASGDEGGSYEQYF	TCRBV13-02	TCRBJ02-07	70	33	34	0	0	3	0
CASGDRAEQFF	TCRBV13-02	TCRBJ02-01	70	47	23	0	0	0	0
CASGEQDTQYF	TCRBV13-02	TCRBJ02-05	70	9	15	8	10	7	21
CASSDGDWGAQYF	TCRBV13-01	TCRBJ02-05	70	0	0	0	70	0	0
CASSDGTGNQDTQYF	TCRBV13-01	TCRBJ02-05	70	0	0	70	0	0	0
CASSDSSYEQYF	TCRBV13-03	TCRBJ02-07	70	15	0	36	19	0	0
CASSGTGGYAEQFF	TCRBV19-01	TCRBJ02-01	70	40	0	0	30	0	0
CASSIRTGGYEQYF	TCRBV19-01	TCRBJ02-07	70	0	6	15	21	6	22
CASSLANSDYTF	TCRBV12-01	TCRBJ01-02	70	0	42	0	19	9	0
CASSLEDNSPLYF	TCRBV03-01	TCRBJ01-06	70	0	0	70	0	0	0
CASSLGGANTGQLYF	TCRBV29-01	TCRBJ02-02	70	0	0	0	0	0	70
CASSLGGGYEQYF	TCRBV14-01	TCRBJ02-07	70	0	0	27	0	0	43
CASSLGGSAETLYF	TCRBV16-01	TCRBJ02-03	70	7	5	0	0	25	33
CASSLTANSDYTF	TCRBV29-01	TCRBJ01-02	70	0	44	0	26	0	0
CASSLTDSGNTLYF	TCRBV03-01	TCRBJ01-03	70	8	0	11	45	6	0
CASSPPGQGGERLFF	TCRBV29-01	TCRBJ01-04	70	0	0	0	0	0	70
CASSQEAGYEQYF	TCRBV05-01	TCRBJ02-07	70	0	22	0	32	16	0
CASSQETGYEQYF	TCRBV02-01	TCRBJ02-07	70	0	0	0	38	32	0
CSSRDQGCNQAPLF	TCRBV30-01	TCRBJ01-05	70	0	0	70	0	0	0
CTCSAARNSDYTF	TCRBV01-01	TCRBJ01-02	70	0	0	0	0	70	0
CASGAGFDYTF	TCRBV13-02	TCRBJ01-02	69	0	0	0	0	0	69
CASGDAGLGYEQYF	TCRBV13-02	TCRBJ02-07	69	0	24	6	6	33	0
CASGDWGNYAEQFF	TCRBV13-02	TCRBJ02-01	69	13	11	40	5	0	0
CASGEDTQYF	TCRBV13-02	TCRBJ02-05	69	13	0	6	25	25	0
CASSDNSGNTLYF	TCRBV13-01	TCRBJ01-03	69	0	19	0	4	23	23
CASSDSGYEQYF	TCRBV13-01	TCRBJ02-07	69	0	0	0	41	28	0
CASSEDSYEQYF	TCRBV13-03	TCRBJ02-07	69	22	0	0	0	0	47
CASSEGVEQYF	TCRBV13-03	TCRBJ02-07	69	0	0	36	0	0	33
CASSLGGSSYEQYF	TCRBV12-01	TCRBJ02-07	69	0	33	0	0	36	0
CASSLGQGPPNERLFF	TCRBV14-01	TCRBJ01-04	69	69	0	0	0	0	0
CASSLGTGGYEQYF	TCRBV16-01	TCRBJ02-07	69	13	0	8	31	13	4
CASSLGTGVEQYF	TCRBV12-01	TCRBJ02-07	69	0	0	31	30	8	0
CASSPDWGVSSYEQYF	TCRBV12-02	TCRBJ02-07	69	0	0	0	0	0	69
CASSPGQANSDYTF	TCRBV12-01	TCRBJ01-02	69	0	0	0	0	25	44
CASSQDWDYEQYF	TCRBV05-01	TCRBJ02-07	69	0	0	17	52	0	0
CASSRGYEQYF	TCRBV17-01	TCRBJ02-07	69	0	0	0	0	22	47
CASSSTGGYEQYF	TCRBV03-01	TCRBJ02-07	69	0	34	0	35	0	0
CAWSLGHSNERLFF	TCRBV31-01	TCRBJ01-04	69	30	0	0	39	0	0
CTCSAGNTEVFF	TCRBV01-01	TCRBJ01-01	69	10	0	22	0	0	37
CTCSALGSSYEQYF	TCRBV01-01	TCRBJ02-07	69	0	0	0	0	0	69
CTCSANTGQLYF	TCRBV01-01	TCRBJ02-02	69	15	0	0	54	0	0
CTCSVNQDTQYF	TCRBV01-01	TCRBJ02-05	69	5	8	56	0	0	0
CAFPGQGMNEQYF	TCRBV31-01	TCRBJ02-07	68	0	0	0	68	0	0
CASGDAGSSYEQYF	TCRBV13-02	TCRBJ02-07	68	0	0	11	39	18	0
CASGESSYEQYF	TCRBV13-02	TCRBJ02-07	68	21	27	0	8	0	12
CASGGTGGYEQYF	TCRBV13-02	TCRBJ02-07	68	29	0	5	23	11	0
CASSDGTYEQYF	TCRBV13-03	TCRBJ02-07	68	0	14	0	0	0	54
CASSGTANSDYTF	TCRBV13-03	TCRBJ01-02	68	6	4	21	14	23	0
CASSLDRYEQYF	TCRBV29-01	TCRBJ02-07	68	0	0	0	0	0	68
CASSLGGYAEQFF	TCRBV03-01	TCRBJ02-01	68	6	0	0	0	58	4
CASSPGGMDTQYF	TCRBV15-01	TCRBJ02-05	68	0	0	0	0	0	68
CASSPGQGNERLFF	TCRBV29-01	TCRBJ01-04	68	5	10	9	28	16	0
CASSPGTGLYEQYF	TCRBV04-01	TCRBJ02-07	68	23	0	0	0	0	45
CASSQDGNTGQLYF	TCRBV02-01	TCRBJ02-02	68	0	0	0	46	0	22
CASSQEGSSAETLYF	TCRBV02-01	TCRBJ02-03	68	12	5	13	0	9	29
CASSQEGWGDAEQFF	TCRBV02-01	TCRBJ02-01	68	0	68	0	0	0	0
CASSQGLTGKSYEQYF	TCRBV02-01	TCRBJ02-07	68	0	0	0	0	0	68
CAWSPTGGGNSDYTF	TCRBV31-01	TCRBJ01-02	68	0	0	68	0	0	0
CTCRGDRGNQAPLF	TCRBV01-01	TCRBJ01-05	68	0	0	68	0	0	0
CTCSADRNTEVFF	TCRBV01-01	TCRBJ01-01	68	0	0	26	6	6	30
CTCSADRQNSDYTF	TCRBV01-01	TCRBJ01-02	68	0	0	0	68	0	0
CTCSAGLGTYEQYF	TCRBV01-01	TCRBJ02-07	68	0	0	0	0	0	68
CTCSAGTDTEVFF	TCRBV01-01	TCRBJ01-01	68	0	0	0	10	36	22
CTCSASRANERLFF	TCRBV01-01	TCRBJ01-04	68	0	0	0	0	0	68
CTCSAVSETLYF	TCRBV01-01	TCRBJ02-03	68	0	0	0	0	0	68
CTCSGQGNERLFF	TCRBV01-01	TCRBJ01-04	68	0	51	17	0	0	0
CTCSPGGRSAETLYF	TCRBV01-01	TCRBJ02-03	68	0	0	0	0	0	68
CASGDWGGQDTQYF	TCRBV13-02	TCRBJ02-05	67	9	0	0	32	9	17
CASGGGQGAETLYF	TCRBV13-02	TCRBJ02-03	67	0	40	0	0	0	27
CASSDPGGSAETLYF	TCRBV13-01	TCRBJ02-03	67	0	43	4	0	0	20
CASSEGEQYF	TCRBV13-03	TCRBJ02-07	67	42	0	0	25	0	0
CASSEGNSGNTLYF	TCRBV13-03	TCRBJ01-03	67	0	21	25	16	5	0
CASSLAGSYEQYF	TCRBV16-01	TCRBJ02-07	67	10	0	22	35	0	0
CASSLDNYEQYF	TCRBV16-01	TCRBJ02-07	67	10	35	0	0	0	22
CASSLDSYEQYF	TCRBV12-01	TCRBJ02-07	67	17	9	0	4	37	0
CASSLDVEQYF	TCRBV16-01	TCRBJ02-07	67	19	13	0	35	0	0
CASSLDWGAETLYF	TCRBV12-01	TCRBJ02-03	67	0	0	0	25	6	36
CASSLGQNYAEQFF	TCRBV03-01	TCRBJ02-01	67	22	17	15	13	0	0
CASSLSRYEQYF	TCRBV29-01	TCRBJ02-07	67	0	0	18	49	0	0
CASSLTSNSDYTF	TCRBV16-01	TCRBJ01-02	67	0	18	7	35	7	0
CASSPGGSGNTLYF	TCRBV16-01	TCRBJ01-03	67	47	0	0	0	0	20
CASSPTGANSDYTF	TCRBV12-02	TCRBJ01-02	67	10	12	0	0	45	0
CASSQDRGGSYEQYF	TCRBV02-01	TCRBJ02-07	67	0	40	0	0	27	0
CASSQGLGVYEQYF	TCRBV05-01	TCRBJ02-07	67	9	4	0	23	31	0
CASSQGTANSDYTF	TCRBV02-01	TCRBJ01-02	67	23	0	0	31	13	0
CASSRDRNTGQLYF	TCRBV17-01	TCRBJ02-02	67	4	0	0	55	8	0
CASSRDWGGYEQYF	TCRBV04-01	TCRBJ02-07	67	4	13	0	16	12	22
CASSRLGGYEQYF	TCRBV04-01	TCRBJ02-07	67	0	0	23	0	16	28
CASSRRSVNERLFF	TCRBV17-01	TCRBJ01-04	67	0	0	0	67	0	0
CASSSTGVEQYF	TCRBV03-01	TCRBJ02-07	67	0	18	49	0	0	0
CAWDWGIAETLYF	TCRBV31-01	TCRBJ02-03	67	0	0	0	0	0	67
CAWSQGRDTQYF	TCRBV31-01	TCRBJ02-05	67	0	0	0	0	0	67
CTCSAAGASSYEQYF	TCRBV01-01	TCRBJ02-07	67	0	0	0	29	0	38
CTCSAASYEQYF	TCRBV01-01	TCRBJ02-07	67	0	0	0	67	0	0
CTCSADEGTGGLNTGQLYF	TCRBV01-01	TCRBJ02-02	67	0	0	67	0	0	0
CTCSADGGEQYF	TCRBV01-01	TCRBJ02-07	67	0	32	35	0	0	0
CTCSADLGGYAEQFF	TCRBV01-01	TCRBJ02-01	67	0	42	0	25	0	0
CTCSAPQIQYF	TCRBV01-01	TCRBJ02-07	67	0	0	0	67	0	0
CTCSATVNSDYTF	TCRBV01-01	TCRBJ01-02	67	25	0	0	0	0	42
CTCSPGQGSAEQFF	TCRBV01-01	TCRBJ02-01	67	0	0	0	0	0	67
CASGDPGANSDYTF	TCRBV13-02	TCRBJ01-02	66	16	0	13	37	0	0
CASSDGGAGTEQFF	TCRBV13-01	TCRBJ02-01	66	0	0	66	0	0	0
CASSDPGGAETLYF	TCRBV13-01	TCRBJ02-03	66	0	0	29	37	0	0
CASSIGTGDYEQYF	TCRBV19-01	TCRBJ02-07	66	0	0	33	24	9	0
CASSIQRVEQFF	TCRBV19-01	TCRBJ02-01	66	0	0	0	0	0	66
CASSLAWGYEQYF	TCRBV03-01	TCRBJ02-07	66	0	0	0	0	0	66
CASSLDSYEQYF	TCRBV15-01	TCRBJ02-07	66	7	5	8	35	0	11
CASSLGGGSAETLYF	TCRBV16-01	TCRBJ02-03	66	0	0	21	0	0	45
CASSLGQGEQYF	TCRBV16-01	TCRBJ02-07	66	0	0	39	27	0	0
CASSLGQQAPLF	TCRBV16-01	TCRBJ01-05	66	0	0	66	0	0	0
CASSLGTGDEQYF	TCRBV03-01	TCRBJ02-07	66	0	0	0	19	0	47
CASSLGYEQYF	TCRBV03-01	TCRBJ02-07	66	0	34	0	0	32	0
CASSLQGNSDYTF	TCRBV04-01	TCRBJ01-02	66	22	0	0	25	19	0
CASSLQGSYEQYF	TCRBV16-01	TCRBJ02-07	66	0	0	0	66	0	0
CASSLQGYEQYF	TCRBV03-01	TCRBJ02-07	66	0	0	16	50	0	0
CASSLTGSAETLYF	TCRBV14-01	TCRBJ02-03	66	0	0	0	0	66	0
CASSPGLGAYEQYF	TCRBV16-01	TCRBJ02-07	66	0	20	0	0	17	29
CASSPGNNQAPLF	TCRBV29-01	TCRBJ01-05	66	0	66	0	0	0	0
CASSPSGTTNSDYTF	TCRBV16-01	TCRBJ01-02	66	0	0	0	0	19	47
CASSQAGSSAETLYF	TCRBV02-01	TCRBJ02-03	66	0	0	0	47	19	0
CASSQDFYEQYF	TCRBV02-01	TCRBJ02-07	66	0	0	0	0	13	53
CASSQDLGVSYEQYF	TCRBV02-01	TCRBJ02-07	66	0	0	20	0	0	46
CASSQDSSYEQYF	TCRBV05-01	TCRBJ02-07	66	2	26	28	10	0	0
CASSQDWGEDTQYF	TCRBV05-01	TCRBJ02-05	66	0	0	33	4	18	11
CASSWDKYEQYF	TCRBV04-01	TCRBJ02-07	66	0	0	0	26	0	40
CAWSLEGYNNQAPLF	TCRBV31-01	TCRBJ01-05	66	0	0	0	0	0	66
CAWSPTISNERLFF	TCRBV31-01	TCRBJ01-04	66	0	0	0	0	0	66
CTCSAAGTGTGNTLYF	TCRBV01-01	TCRBJ01-03	66	0	0	0	66	0	0
CTCSADWGEDTQYF	TCRBV01-01	TCRBJ02-05	66	30	0	0	0	0	36
CTCSADWGGDEQYF	TCRBV01-01	TCRBJ02-07	66	4	4	27	31	0	0
CTCSAGDWGYEQYF	TCRBV01-01	TCRBJ02-07	66	0	0	0	0	14	52
CTCSAGEVTETLYF	TCRBV01-01	TCRBJ02-03	66	0	0	0	0	0	66
CTCSEGRNQAPLF	TCRBV01-01	TCRBJ01-05	66	0	0	0	66	0	0
CTCSGEGTSAETLYF	TCRBV01-01	TCRBJ02-03	66	0	0	0	0	0	66
CTCSGTANTGQLYF	TCRBV01-01	TCRBJ02-02	66	0	8	0	0	0	58
CASGDALYEQYF	TCRBV13-02	TCRBJ02-07	65	25	0	17	23	0	0
CASGDATANSDYTF	TCRBV13-02	TCRBJ01-02	65	0	0	0	48	17	0
CASGDGNSPLYF	TCRBV13-02	TCRBJ01-06	65	0	0	6	41	18	0
CASGEMGGSYEQYF	TCRBV13-02	TCRBJ02-07	65	0	0	45	0	0	20
CASGGTISNERLFF	TCRBV13-02	TCRBJ01-04	65	0	2	18	26	0	19
CASSDAGVEQYF	TCRBV13-01	TCRBJ02-07	65	0	8	15	35	7	0
CASSDDYEQYF	TCRBV13-03	TCRBJ02-07	65	0	65	0	0	0	0
CASSFYGAEQYF	TCRBV14-01	TCRBJ02-07	65	0	0	0	65	0	0
CASSIEGYEQYF	TCRBV19-01	TCRBJ02-07	65	0	0	15	34	0	16
CASSPDWGSYEQYF	TCRBV05-01	TCRBJ02-07	65	14	0	16	16	19	0
CASSQDLYEQYF	TCRBV02-01	TCRBJ02-07	65	0	0	35	0	30	0
CASSQDWGSYEQYF	TCRBV05-01	TCRBJ02-07	65	4	0	17	40	4	0
CASSRTGGSYEQYF	TCRBV03-01	TCRBJ02-07	65	0	0	10	42	13	0
CASSRTGGYEQYF	TCRBV15-01	TCRBJ02-07	65	0	0	20	28	17	0
CASSSGLGYAEQFF	TCRBV03-01	TCRBJ02-01	65	0	43	0	22	0	0
CAWSLGGGEQYF	TCRBV31-01	TCRBJ02-07	65	10	0	0	22	15	18
CTCSADGVSNERLFF	TCRBV01-01	TCRBJ01-04	65	15	0	50	0	0	0
CTCSADRNNQAPLF	TCRBV01-01	TCRBJ01-05	65	28	5	0	7	25	0
CTCSAEGFSAETLYF	TCRBV01-01	TCRBJ02-03	65	0	0	0	0	0	65
CTCSAGGSEQYF	TCRBV01-01	TCRBJ02-07	65	0	0	0	65	0	0
CASGDAGLGGYEQYF	TCRBV13-02	TCRBJ02-07	64	0	26	0	3	10	25
CASGDASSYEQYF	TCRBV13-02	TCRBJ02-07	64	0	0	0	36	28	0
CASGDNNQAPLF	TCRBV13-02	TCRBJ01-05	64	0	4	23	21	16	0
CASRTVSGNTLYF	TCRBV13-03	TCRBJ01-03	64	0	0	0	0	0	64
CASSDGNSGNTLYF	TCRBV13-01	TCRBJ01-03	64	20	25	0	19	0	0
CASSDNSYEQYF	TCRBV13-01	TCRBJ02-07	64	11	0	40	13	0	0
CASSDWGGYEQYF	TCRBV13-03	TCRBJ02-07	64	4	0	0	60	0	0
CASSFRDSYEQYF	TCRBV14-01	TCRBJ02-07	64	0	0	0	34	30	0
CASSIGGNYAEQFF	TCRBV19-01	TCRBJ02-01	64	12	7	32	9	4	0
CASSIHWGGQDTQYF	TCRBV12-02	TCRBJ02-05	64	0	0	0	0	0	64
CASSLDQDTQYF	TCRBV16-01	TCRBJ02-05	64	0	0	20	0	0	44
CASSLDSAETLYF	TCRBV16-01	TCRBJ02-03	64	0	6	21	4	33	0
CASSLEGGYAEQFF	TCRBV03-01	TCRBJ02-01	64	8	2	0	0	0	54
CASSLGDSGNTLYF	TCRBV16-01	TCRBJ01-03	64	19	0	0	45	0	0
CASSLGQSNERLFF	TCRBV03-01	TCRBJ01-04	64	0	18	0	46	0	0
CASSLGTDAEQFF	TCRBV16-01	TCRBJ02-01	64	9	0	0	0	34	21
CASSLQDTQYF	TCRBV12-01	TCRBJ02-05	64	0	20	0	0	21	23
CASSLVNSGNTLYF	TCRBV16-01	TCRBJ01-03	64	17	5	38	0	4	0
CASSPGIYEQYF	TCRBV15-01	TCRBJ02-07	64	0	0	0	0	0	64
CASSPGQGANSDYTF	TCRBV19-01	TCRBJ01-02	64	0	0	0	0	0	64
CASSPGQYEQYF	TCRBV16-01	TCRBJ02-07	64	15	19	17	0	13	0
CASSQDNPGQNTEVFF	TCRBV05-01	TCRBJ01-01	64	64	0	0	0	0	0
CASSQGQSNSDYTF	TCRBV02-01	TCRBJ01-02	64	0	37	0	27	0	0
CASSQPGQYAEQFF	TCRBV02-01	TCRBJ02-01	64	0	0	51	0	13	0
CASSQPGQYEQYF	TCRBV02-01	TCRBJ02-07	64	0	0	0	40	24	0
CASSRDRANSDYTF	TCRBV03-01	TCRBJ01-02	64	14	25	0	25	0	0
CASSRTGGYEQYF	TCRBV04-01	TCRBJ02-07	64	0	0	0	0	24	40
CASSSLYEQYF	TCRBV04-01	TCRBJ02-07	64	0	0	10	32	0	22
CASSWGQVYEQYF	TCRBV03-01	TCRBJ02-07	64	0	0	0	0	0	64
CASSYWGGSAETLYF	TCRBV04-01	TCRBJ02-03	64	0	0	25	39	0	0
CGARDSGNTLYF	TCRBV20-01	TCRBJ01-03	64	34	0	0	22	8	0
CGAREGGYEQYF	TCRBV20-01	TCRBJ02-07	64	12	0	0	33	19	0
CTCREGQFYAEQFF	TCRBV01-01	TCRBJ02-01	64	0	0	0	0	0	64
CTCSADKASDYTF	TCRBV01-01	TCRBJ01-02	64	0	0	0	64	0	0
CTCSADSGEQYF	TCRBV01-01	TCRBJ02-07	64	0	31	0	33	0	0
CTCSADWGQNTLYF	TCRBV01-01	TCRBJ02-04	64	0	11	10	0	0	43
CTCSAGTGGSAETLYF	TCRBV01-01	TCRBJ02-03	64	0	42	0	13	9	0
CTCSAQGGNQAPLF	TCRBV01-01	TCRBJ01-05	64	29	0	0	0	35	0
CTCSAQGNNQAPLF	TCRBV01-01	TCRBJ01-05	64	0	0	0	39	25	0
CTCSGQGNSDYTF	TCRBV01-01	TCRBJ01-02	64	0	0	0	0	0	64
CASGDAGANTEVFF	TCRBV13-02	TCRBJ01-01	63	0	29	25	0	9	0
CASGDAGGSNERLFF	TCRBV13-02	TCRBJ01-04	63	11	7	10	24	11	0
CASGDEDSLPLYF	TCRBV13-02	TCRBJ01-06	63	0	63	0	0	0	0
CASGDEQYEQYF	TCRBV13-02	TCRBJ02-07	63	36	0	0	0	27	0
CASGDPGGSYEQYF	TCRBV13-02	TCRBJ02-07	63	14	0	28	21	0	0
CASGDSGGYEQYF	TCRBV13-02	TCRBJ02-07	63	0	0	16	47	0	0
CASGDWGAETLYF	TCRBV13-02	TCRBJ02-03	63	23	30	0	0	0	10
CASGGTTNSDYTF	TCRBV13-02	TCRBJ01-02	63	6	16	4	26	11	0
CASNDWGTSAETLYF	TCRBV13-03	TCRBJ02-03	63	0	0	0	0	63	0
CASSDTVSNERLFF	TCRBV13-01	TCRBJ01-04	63	15	7	0	41	0	0
CASSFSAETLYF	TCRBV03-01	TCRBJ02-03	63	0	0	0	40	0	23
CASSLAGASAETLYF	TCRBV03-01	TCRBJ02-03	63	5	0	0	49	9	0
CASSLDNSGNTLYF	TCRBV12-01	TCRBJ01-03	63	4	0	18	0	15	26
CASSLDSANSDYTF	TCRBV03-01	TCRBJ01-02	63	0	5	25	0	33	0
CASSLGGASAETLYF	TCRBV03-01	TCRBJ02-03	63	9	4	31	0	19	0
CASSLGGGEEQYF	TCRBV16-01	TCRBJ02-07	63	0	0	0	0	63	0
CASSLGGNSDYTF	TCRBV03-01	TCRBJ01-02	63	23	4	17	0	19	0
CASSLGVNQDTQYF	TCRBV03-01	TCRBJ02-05	63	4	0	0	22	5	32
CASSLRTNSDYTF	TCRBV12-01	TCRBJ01-02	63	0	36	0	27	0	0
CASSLTGGYEQYF	TCRBV15-01	TCRBJ02-07	63	0	0	6	10	47	0
CASSLTGNSDYTF	TCRBV16-01	TCRBJ01-02	63	0	29	34	0	0	0
CASSLYEQYF	TCRBV19-01	TCRBJ02-07	63	0	0	34	29	0	0
CASSPGLGGYAEQFF	TCRBV19-01	TCRBJ02-01	63	0	0	0	0	63	0
CASSPGLGVSAETLYF	TCRBV14-01	TCRBJ02-03	63	0	0	0	16	16	31
CASSPSSYEQYF	TCRBV05-01	TCRBJ02-07	63	0	0	0	41	22	0
CASSPTSYEQYF	TCRBV12-01	TCRBJ02-07	63	0	0	37	26	0	0
CASSQDRNSDYTF	TCRBV05-01	TCRBJ01-02	63	0	0	0	27	16	20
CASSQEGGSAETLYF	TCRBV05-01	TCRBJ02-03	63	12	0	0	16	6	29
CASSQETGGYEQYF	TCRBV05-01	TCRBJ02-07	63	11	0	0	17	10	25
CASSRGSDYTF	TCRBV29-01	TCRBJ01-02	63	22	0	0	0	0	41
CASSSRDRNQAPLF	TCRBV04-01	TCRBJ01-05	63	0	63	0	0	0	0
CAWSLVGGLAETLYF	TCRBV31-01	TCRBJ02-03	63	0	0	0	63	0	0
CAWSLWGSAETLYF	TCRBV31-01	TCRBJ02-03	63	0	0	0	0	63	0
CTCSAAGNYAEQFF	TCRBV01-01	TCRBJ02-01	63	0	0	11	0	52	0
CTCSADYRNTGQLYF	TCRBV01-01	TCRBJ02-02	63	0	0	0	0	0	63
CTCSASGNNNNQAPLF	TCRBV01-01	TCRBJ01-05	63	0	0	0	63	0	0
CTCSAYRDSDYTF	TCRBV01-01	TCRBJ01-02	63	0	29	0	0	34	0
CTCSGTGGSYEQYF	TCRBV01-01	TCRBJ02-07	63	0	0	0	0	0	63
CASGDAGAGNTLYF	TCRBV13-02	TCRBJ01-03	62	0	0	33	0	23	6
CASGDAVSNERLFF	TCRBV13-02	TCRBJ01-04	62	12	17	0	33	0	0
CASGDPYEQYF	TCRBV13-02	TCRBJ02-07	62	22	0	0	40	0	0
CASGDRGNYAEQFF	TCRBV13-02	TCRBJ02-01	62	0	4	21	15	22	0
CASGETGYEQYF	TCRBV13-02	TCRBJ02-07	62	0	13	22	21	6	0
CASGGGYEQYF	TCRBV13-02	TCRBJ02-07	62	0	0	18	21	23	0
CASRGPSQNTLYF	TCRBV14-01	TCRBJ02-04	62	0	62	0	0	0	0
CASSDAGLYAEQFF	TCRBV13-01	TCRBJ02-01	62	0	0	0	62	0	0
CASSDARYEQYF	TCRBV13-01	TCRBJ02-07	62	0	0	14	48	0	0
CASSDGSYEQYF	TCRBV13-03	TCRBJ02-07	62	0	0	0	34	28	0
CASSDSSGNTLYF	TCRBV13-03	TCRBJ01-03	62	36	0	13	0	13	0
CASSEDRGRGQDTQYF	TCRBV13-01	TCRBJ02-05	62	0	0	62	0	0	0
CASSGTANSDYTF	TCRBV13-01	TCRBJ01-02	62	0	7	0	0	51	4
CASSGTTNSDYTF	TCRBV13-01	TCRBJ01-02	62	4	15	0	16	0	27
CASSITGANSDYTF	TCRBV19-01	TCRBJ01-02	62	0	0	0	35	27	0
CASSLDNSNERLFF	TCRBV05-01	TCRBJ01-04	62	0	0	0	62	0	0
CASSLDWGDAEQFF	TCRBV03-01	TCRBJ02-01	62	0	0	0	19	19	24
CASSLEDSYEQYF	TCRBV03-01	TCRBJ02-07	62	34	0	0	0	28	0
CASSLEGGAETLYF	TCRBV12-01	TCRBJ02-03	62	0	0	0	0	0	62
CASSLGGGEQYF	TCRBV16-01	TCRBJ02-07	62	0	0	39	7	16	0
CASSLGTANTEVFF	TCRBV12-02	TCRBJ01-01	62	0	0	0	25	37	0
CASSLRGNYAEQFF	TCRBV03-01	TCRBJ02-01	62	0	41	0	0	21	0
CASSLTANSDYTF	TCRBV03-01	TCRBJ01-02	62	0	17	15	26	4	0
CASSMGDTGQLYF	TCRBV19-01	TCRBJ02-02	62	0	43	19	0	0	0
CASSPGLGGYEQYF	TCRBV19-01	TCRBJ02-07	62	0	26	0	0	15	21
CASSPGLGYEQYF	TCRBV03-01	TCRBJ02-07	62	10	0	0	34	18	0
CASSPGTANSDYTF	TCRBV16-01	TCRBJ01-02	62	0	7	0	38	17	0
CASSPNQDTQYF	TCRBV02-01	TCRBJ02-05	62	0	0	19	0	0	43
CASSQDPGYEQYF	TCRBV02-01	TCRBJ02-07	62	12	32	0	0	18	0
CASSQDRGDTQYF	TCRBV02-01	TCRBJ02-05	62	0	7	0	0	0	55
CASSQEGGGAETLYF	TCRBV02-01	TCRBJ02-03	62	0	19	20	15	2	6
CASSQGTTNSDYTF	TCRBV02-01	TCRBJ01-02	62	0	0	0	40	20	2
CASSQTGTGGYEQYF	TCRBV05-01	TCRBJ02-07	62	0	7	9	0	14	32
CASSQVQKNTLYF	TCRBV05-01	TCRBJ02-04	62	0	0	0	0	0	62
CASSSDWGGYEQYF	TCRBV03-01	TCRBJ02-07	62	0	19	0	4	0	39
CASSSGQGTNERLFF	TCRBV04-01	TCRBJ01-04	62	0	0	0	62	0	0
CASSWDSAETLYF	TCRBV03-01	TCRBJ02-03	62	23	0	0	39	0	0
CASSYGSSYEQYF	TCRBV04-01	TCRBJ02-07	62	14	0	33	0	15	0
CAWSLGGGPKQYF	TCRBV31-01	TCRBJ02-07	62	0	0	0	0	0	62
CAWSLGNSDYTF	TCRBV31-01	TCRBJ01-02	62	0	12	16	0	28	6
CAWSLGQGAGNTLYF	TCRBV31-01	TCRBJ01-03	62	33	0	0	10	19	0
CTCGTGGNQAPLF	TCRBV01-01	TCRBJ01-05	62	0	0	0	0	0	62
CTCSAGGSGAETLYF	TCRBV01-01	TCRBJ02-03	62	62	0	0	0	0	0
CTCSAVNSGNTLYF	TCRBV01-01	TCRBJ01-03	62	0	42	0	20	0	0
CTCSEGAETLYF	TCRBV01-01	TCRBJ02-03	62	0	0	0	0	0	62
CTCSGGQGANERLFF	TCRBV01-01	TCRBJ01-04	62	0	0	0	0	0	62
CTCSGQNNQAPLF	TCRBV01-01	TCRBJ01-05	62	0	0	0	62	0	0
CTCSSRDRGLAPLF	TCRBV01-01	TCRBJ01-05	62	0	0	0	0	0	62
CASGDNYNSPLYF	TCRBV13-02	TCRBJ01-06	61	0	23	4	10	8	16
CASGDRGGQDTQYF	TCRBV13-02	TCRBJ02-05	61	4	0	22	26	9	0
CASRSGGGTLYF	TCRBV29-01	TCRBJ02-04	61	0	0	0	0	0	61
CASSDGGDEQYF	TCRBV13-03	TCRBJ02-07	61	0	0	0	18	5	38
CASSDWGTGNTLYF	TCRBV13-01	TCRBJ01-03	61	0	0	0	61	0	0
CASSFDWGGYEQYF	TCRBV03-01	TCRBJ02-07	61	8	12	0	0	0	41
CASSFTGGYEQYF	TCRBV16-01	TCRBJ02-07	61	13	0	34	0	0	14
CASSGHQNTGQLYF	TCRBV13-03	TCRBJ02-02	61	0	61	0	0	0	0
CASSGTSKDTQYF	TCRBV15-01	TCRBJ02-05	61	0	0	0	61	0	0
CASSHYEQYF	TCRBV02-01	TCRBJ02-07	61	14	20	27	0	0	0
CASSLDEQYF	TCRBV16-01	TCRBJ02-07	61	16	5	0	0	23	17
CASSLDTNSDYTF	TCRBV16-01	TCRBJ01-02	61	0	61	0	0	0	0
CASSLEGGSSYEQYF	TCRBV03-01	TCRBJ02-07	61	0	21	0	40	0	0
CASSLGNTGQLYF	TCRBV03-01	TCRBJ02-02	61	0	0	0	32	0	29
CASSLGSSYEQYF	TCRBV12-01	TCRBJ02-07	61	12	0	0	0	8	41
CASSLQGMEQYF	TCRBV29-01	TCRBJ02-07	61	0	0	0	61	0	0
CASSLRGSGNTLYF	TCRBV03-01	TCRBJ01-03	61	0	0	38	16	7	0
CASSLSYEQYF	TCRBV12-02	TCRBJ02-07	61	4	0	0	46	11	0
CASSLTGGYAEQFF	TCRBV12-01	TCRBJ02-01	61	0	0	11	22	4	24
CASSMGNYAEQFF	TCRBV19-01	TCRBJ02-01	61	0	0	0	45	16	0
CASSMKGAGNTLYF	TCRBV19-01	TCRBJ01-03	61	0	0	30	0	0	31
CASSPDRGEQYF	TCRBV03-01	TCRBJ02-07	61	0	0	0	61	0	0
CASSPDWGGAETLYF	TCRBV12-01	TCRBJ02-03	61	0	20	20	21	0	0
CASSPDWGGVEQYF	TCRBV03-01	TCRBJ02-07	61	0	0	0	0	30	31
CASSPGGQTSAETLYF	TCRBV03-01	TCRBJ02-03	61	0	0	0	0	0	61
CASSPGNSDYTF	TCRBV04-01	TCRBJ01-02	61	0	0	0	0	0	61
CASSPGTANTEVFF	TCRBV19-01	TCRBJ01-01	61	5	0	19	5	6	26
CASSPGTISNERLFF	TCRBV19-01	TCRBJ01-04	61	0	0	0	25	0	36
CASSPGTTNSDYTF	TCRBV12-01	TCRBJ01-02	61	0	0	10	31	20	0
CASSRTEQYF	TCRBV14-01	TCRBJ02-07	61	0	0	0	0	0	61
CASSRTFYEQYF	TCRBV04-01	TCRBJ02-07	61	16	34	0	0	11	0
CASSSGLGYEQYF	TCRBV03-01	TCRBJ02-07	61	0	0	21	24	16	0
CAWRGTGGPERLFF	TCRBV31-01	TCRBJ01-04	61	0	0	0	0	0	61
CAWSLGQNSDYTF	TCRBV31-01	TCRBJ01-02	61	16	0	0	26	0	19
CTCSAAFYEQYF	TCRBV01-01	TCRBJ02-07	61	0	0	0	61	0	0
CTCSADNSPLYF	TCRBV01-01	TCRBJ01-06	61	28	0	23	10	0	0
CTCSADTGQAPLF	TCRBV01-01	TCRBJ01-05	61	0	0	0	0	0	61
CTCSAGQNSGNTLYF	TCRBV01-01	TCRBJ01-03	61	0	0	4	0	57	0
CTCSAGTNQAPLF	TCRBV01-01	TCRBJ01-05	61	0	0	0	0	61	0
CTCSAQGNTEVFF	TCRBV01-01	TCRBJ01-01	61	0	0	22	11	14	14
CTCSPGQYAEQFF	TCRBV01-01	TCRBJ02-01	61	0	0	0	0	0	61
GGGAETLYF	TCRBV01-01	TCRBJ02-03	61	61	0	0	0	0	0
CASGDANYEQYF	TCRBV13-02	TCRBJ02-07	60	2	0	0	58	0	0
CASGDRDSDYTF	TCRBV13-02	TCRBJ01-02	60	7	8	0	19	0	26
CASGEVEQYF	TCRBV13-02	TCRBJ02-07	60	0	0	0	29	0	31
CASGGTGDGNTLYF	TCRBV13-02	TCRBJ01-03	60	0	32	28	0	0	0
CASGHWGENTGQLYF	TCRBV13-02	TCRBJ02-02	60	0	38	22	0	0	0
CASGPGTGGYEQYF	TCRBV13-02	TCRBJ02-07	60	0	25	0	29	6	0
CASGQANTGQLYF	TCRBV15-01	TCRBJ02-02	60	0	0	0	0	0	60
CASRTGGYEQYF	TCRBV13-03	TCRBJ02-07	60	0	0	0	0	42	18
CASSDAGGYEQYF	TCRBV13-01	TCRBJ02-07	60	2	0	0	30	28	0
CASSDGGTGSHEQYF	TCRBV13-01	TCRBJ02-07	60	0	0	0	0	0	60
CASSDGGVSYEQYF	TCRBV13-01	TCRBJ02-07	60	0	0	60	0	0	0
CASSDRNSGNTLYF	TCRBV13-03	TCRBJ01-03	60	14	0	0	0	40	6
CASSFQDTQYF	TCRBV03-01	TCRBJ02-05	60	4	25	9	7	4	11
CASSFTSYEQYF	TCRBV14-01	TCRBJ02-07	60	0	0	37	23	0	0
CASSFWGGYEQYF	TCRBV14-01	TCRBJ02-07	60	0	0	0	24	36	0
CASSGDGGALAEQFF	TCRBV13-03	TCRBJ02-01	60	0	0	0	60	0	0
CASSIDRGPNSGNTLYF	TCRBV29-01	TCRBJ01-03	60	0	0	0	0	0	60
CASSIGGNTEVFF	TCRBV19-01	TCRBJ01-01	60	9	4	21	20	6	0
CASSIRDFSYEQYF	TCRBV19-01	TCRBJ02-07	60	0	0	0	0	60	0
CASSIRGNTEVFF	TCRBV19-01	TCRBJ01-01	60	8	0	8	24	20	0
CASSIRGSSYEQYF	TCRBV19-01	TCRBJ02-07	60	7	0	22	23	0	8
CASSLDWGGYAEQFF	TCRBV16-01	TCRBJ02-01	60	0	0	0	32	0	28
CASSLDWGYEQYF	TCRBV03-01	TCRBJ02-07	60	0	14	34	0	12	0
CASSLGGPYEQYF	TCRBV12-01	TCRBJ02-07	60	0	0	0	0	0	60
CASSLGLGEYEQYF	TCRBV12-01	TCRBJ02-07	60	0	0	0	0	0	60
CASSLGLGVYEQYF	TCRBV03-01	TCRBJ02-07	60	0	0	0	60	0	0
CASSLGLSSYEQYF	TCRBV12-01	TCRBJ02-07	60	14	0	28	18	0	0
CASSLGNQDTQYF	TCRBV12-02	TCRBJ02-05	60	0	0	47	13	0	0
CASSLGNTEVFF	TCRBV14-01	TCRBJ01-01	60	0	18	20	0	0	22
CASSLGQGAYEQYF	TCRBV12-01	TCRBJ02-07	60	11	33	0	0	16	0
CASSLGTGQLYF	TCRBV03-01	TCRBJ02-02	60	0	0	23	0	0	37
CASSLWEQYF	TCRBV12-02	TCRBJ02-07	60	0	0	0	0	0	60
CASSMGQYEQYF	TCRBV19-01	TCRBJ02-07	60	0	0	0	0	0	60
CASSPDSYEQYF	TCRBV03-01	TCRBJ02-07	60	21	0	0	39	0	0
CASSPDWGNTGQLYF	TCRBV04-01	TCRBJ02-02	60	0	0	20	0	40	0
CASSPGQNERLFF	TCRBV19-01	TCRBJ01-04	60	0	0	29	0	0	31
CASSPGRQDTQYF	TCRBV16-01	TCRBJ02-05	60	11	0	24	0	0	25
CASSPSGVSNERLFF	TCRBV29-01	TCRBJ01-04	60	0	0	0	0	15	45
CASSQDLDTYEQYF	TCRBV02-01	TCRBJ02-07	60	0	0	0	60	0	0
CASSQDRSYEQYF	TCRBV02-01	TCRBJ02-07	60	0	16	0	29	15	0
CASSQEAGYEQYF	TCRBV02-01	TCRBJ02-07	60	8	0	15	21	16	0
CASSQEGYEQYF	TCRBV02-01	TCRBJ02-07	60	11	0	0	0	0	49
CASSQGTGNSDYTF	TCRBV05-01	TCRBJ01-02	60	0	0	35	0	7	18
CASSQTGNSDYTF	TCRBV02-01	TCRBJ01-02	60	0	21	18	21	0	0
CASSRANSDYTF	TCRBV02-01	TCRBJ01-02	60	0	0	23	37	0	0
CASSYGYEQYF	TCRBV04-01	TCRBJ02-07	60	0	15	32	0	13	0
CAWSGTPSYEQYF	TCRBV31-01	TCRBJ02-07	60	0	0	0	0	0	60
CAWSLLGDEQYF	TCRBV31-01	TCRBJ02-07	60	0	0	0	60	0	0
CAWSLRGDEQYF	TCRBV31-01	TCRBJ02-07	60	0	0	13	47	0	0
CAWSPGQNSDYTF	TCRBV31-01	TCRBJ01-02	60	0	12	48	0	0	0
CTCSADFYNNQAPLF	TCRBV01-01	TCRBJ01-05	60	0	0	0	0	0	60
CTCSADRNSDYTF	TCRBV01-01	TCRBJ01-02	60	0	0	0	0	60	0
CTCSADTGPNSDYTF	TCRBV01-01	TCRBJ01-02	60	0	53	0	7	0	0
CTCSAGANSDYTF	TCRBV01-01	TCRBJ01-02	60	0	36	20	0	4	0
CTCSAGQYNSPLYF	TCRBV01-01	TCRBJ01-06	60	21	5	0	34	0	0
CTCSARDRVAEQFF	TCRBV01-01	TCRBJ02-01	60	0	0	0	0	0	60
CTCSAWGGAETLYF	TCRBV01-01	TCRBJ02-03	60	7	34	0	19	0	0
CTCSGTARENNQAPLF	TCRBV01-01	TCRBJ01-05	60	0	0	0	60	0	0
CASGDLSYEQYF	TCRBV13-02	TCRBJ02-07	59	5	9	31	14	0	0
CASGDVGYEQYF	TCRBV13-02	TCRBJ02-07	59	0	0	0	17	42	0
CASGELGYEQYF	TCRBV13-02	TCRBJ02-07	59	13	17	0	15	0	14
CASGGDWGGYEQYF	TCRBV13-02	TCRBJ02-07	59	11	0	0	31	0	17
CASGTGGYEQYF	TCRBV13-02	TCRBJ02-07	59	12	0	0	15	0	32
CASSDGQGYEQYF	TCRBV13-03	TCRBJ02-07	59	0	0	0	0	15	44
CASSDPGAGNTLYF	TCRBV13-03	TCRBJ01-03	59	0	0	0	59	0	0
CASSDYEQYF	TCRBV13-01	TCRBJ02-07	59	7	0	0	32	20	0
CASSETEYEQYF	TCRBV13-01	TCRBJ02-07	59	0	0	0	59	0	0
CASSGDSYEQYF	TCRBV03-01	TCRBJ02-07	59	0	0	0	0	59	0
CASSGTANSDYTF	TCRBV16-01	TCRBJ01-02	59	0	0	0	25	0	34
CASSIQGANSDYTF	TCRBV19-01	TCRBJ01-02	59	0	0	0	32	7	20
CASSLAGDEQYF	TCRBV12-01	TCRBJ02-07	59	23	0	0	0	0	36
CASSLGGDNQAPLF	TCRBV03-01	TCRBJ01-05	59	0	0	0	59	0	0
CASSLGGWEQYF	TCRBV12-01	TCRBJ02-07	59	0	32	0	0	0	27
CASSLGNQDTQYF	TCRBV12-01	TCRBJ02-05	59	0	35	0	0	8	16
CASSLSRQAPLF	TCRBV29-01	TCRBJ01-05	59	0	0	0	0	0	59
CASSPGNSDYTF	TCRBV12-01	TCRBJ01-02	59	0	0	6	35	18	0
CASSQDRDSDYTF	TCRBV05-01	TCRBJ01-02	59	0	35	0	20	0	4
CASSQDRGQDTQYF	TCRBV05-01	TCRBJ02-05	59	30	17	4	0	6	2
CASSQEGQGAETLYF	TCRBV02-01	TCRBJ02-03	59	0	0	0	7	0	52
CASSQERDWGYEQYF	TCRBV02-01	TCRBJ02-07	59	0	27	0	19	13	0
CASSQSSYEQYF	TCRBV05-01	TCRBJ02-07	59	0	4	0	0	37	18
CASSSGGGEQYF	TCRBV03-01	TCRBJ02-07	59	0	0	6	0	0	53
CASSTGTYNQAPLF	TCRBV19-01	TCRBJ01-05	59	8	0	0	0	0	51
CAWNRDSGNQAPLF	TCRBV31-01	TCRBJ01-05	59	0	0	0	59	0	0
CAWRRGFSYEQYF	TCRBV31-01	TCRBJ02-07	59	0	0	0	59	0	0
CAWSLEYEQYF	TCRBV31-01	TCRBJ02-07	59	0	0	0	59	0	0
CGARGTGGEQYF	TCRBV20-01	TCRBJ02-07	59	0	18	0	0	0	41
CTCSADRPYNSPLYF	TCRBV01-01	TCRBJ01-06	59	0	0	26	0	0	33
CTCSAPGTINQAPLF	TCRBV01-01	TCRBJ01-05	59	0	0	0	59	0	0
CTCSAVREAAETLYF	TCRBV01-01	TCRBJ02-03	59	0	0	0	59	0	0
CTCSEGLGDYEQYF	TCRBV01-01	TCRBJ02-07	59	0	0	0	17	42	0
CTCSETGVYEQYF	TCRBV01-01	TCRBJ02-07	59	0	0	0	59	0	0
QAPLF	TCRBV16-01	TCRBJ01-05	59	0	0	59	0	0	0
CASGALEQYF	TCRBV13-02	TCRBJ02-07	58	0	0	0	58	0	0
CASGDAAGYNSPLYF	TCRBV13-02	TCRBJ01-06	58	0	25	0	24	9	0
CASGDNNSPLYF	TCRBV13-02	TCRBJ01-06	58	15	0	0	0	0	43
CASGDPGQGDSDYTF	TCRBV13-02	TCRBJ01-02	58	0	0	19	16	23	0
CASGDWGNTGQLYF	TCRBV13-02	TCRBJ02-02	58	3	0	0	0	55	0
CASGEGYEQYF	TCRBV13-02	TCRBJ02-07	58	0	14	0	24	20	0
CASREGGEQYF	TCRBV16-01	TCRBJ02-07	58	0	0	0	0	0	58
CASSDGGEQYF	TCRBV13-01	TCRBJ02-07	58	0	41	0	13	4	0
CASSDRDNSYEQYF	TCRBV13-03	TCRBJ02-07	58	0	18	0	40	0	0
CASSFGQGQAPLF	TCRBV03-01	TCRBJ01-05	58	0	0	0	0	0	58
CASSFGTGGYEQYF	TCRBV03-01	TCRBJ02-07	58	0	15	0	22	0	21
CASSFSYEQYF	TCRBV14-01	TCRBJ02-07	58	10	33	0	15	0	0
CASSFTGNSDYTF	TCRBV16-01	TCRBJ01-02	58	5	0	0	0	0	53
CASSHGTGGNSDYTF	TCRBV02-01	TCRBJ01-02	58	0	0	0	0	0	58
CASSIGNYAEQFF	TCRBV19-01	TCRBJ02-01	58	0	0	9	42	7	0
CASSIGSAETLYF	TCRBV19-01	TCRBJ02-03	58	0	15	0	17	6	20
CASSLDRDQAPLF	TCRBV03-01	TCRBJ01-05	58	0	0	0	0	0	58
CASSLGGDSDYTF	TCRBV03-01	TCRBJ01-02	58	0	0	0	0	25	33
CASSLGGQDTQYF	TCRBV16-01	TCRBJ02-05	58	9	0	8	35	6	0
CASSLRGASAETLYF	TCRBV03-01	TCRBJ02-03	58	0	0	0	23	0	35
CASSPGQYEQYF	TCRBV12-02	TCRBJ02-07	58	15	0	43	0	0	0
CASSQDGVSYEQYF	TCRBV05-01	TCRBJ02-07	58	0	0	0	58	0	0
CASSQDRNYAEQFF	TCRBV02-01	TCRBJ02-01	58	0	4	0	41	13	0
CASSQDRVEQYF	TCRBV05-01	TCRBJ02-07	58	0	8	0	11	20	19
CASSQDWGGYAEQFF	TCRBV05-01	TCRBJ02-01	58	13	15	5	14	11	0
CASSQDWGQDTQYF	TCRBV05-01	TCRBJ02-05	58	0	4	0	0	12	42
CASSQEGEQYF	TCRBV05-01	TCRBJ02-07	58	0	0	30	12	16	0
CASSQEGGNYAEQFF	TCRBV02-01	TCRBJ02-01	58	0	29	5	0	0	24
CASSQELGGYEQYF	TCRBV02-01	TCRBJ02-07	58	13	0	0	16	6	23
CASSQGGNQDTQYF	TCRBV05-01	TCRBJ02-05	58	28	0	14	6	10	0
CASSQQDSGNTLYF	TCRBV02-01	TCRBJ01-03	58	0	0	0	0	58	0
CASSRDRGDTQYF	TCRBV14-01	TCRBJ02-05	58	0	0	0	20	38	0
CASSRDSNTLYF	TCRBV02-01	TCRBJ02-04	58	0	0	58	0	0	0
CASSRGENTLYF	TCRBV13-01	TCRBJ02-04	58	0	0	0	0	58	0
CASSRGFSNERLFF	TCRBV16-01	TCRBJ01-04	58	0	58	0	0	0	0
CASSSDRAEQYF	TCRBV03-01	TCRBJ02-07	58	0	0	0	15	43	0
CASTPDRSSYEQYF	TCRBV19-01	TCRBJ02-07	58	0	0	0	0	15	43
CAWSLGRGSSYEQYF	TCRBV31-01	TCRBJ02-07	58	0	0	18	0	0	40
CAWSRDNNQAPLF	TCRBV31-01	TCRBJ01-05	58	0	0	0	0	6	52
CAWSRGQGSAETLYF	TCRBV31-01	TCRBJ02-03	58	0	0	0	58	0	0
CGAGDWGNTGQLYF	TCRBV20-01	TCRBJ02-02	58	0	14	14	8	18	4
CGARVWGGALYF	TCRBV20-01	TCRBJ02-04	58	0	58	0	0	0	0
CGRLGSSAETLYF	TCRBV31-01	TCRBJ02-03	58	0	0	0	0	0	58
CSSSQAPLF	TCRBV23-01	TCRBJ01-05	58	0	0	0	13	0	45
CSSSQSGEQYF	TCRBV23-01	TCRBJ02-07	58	0	0	0	36	22	0
CTCSAAGTGNTLYF	TCRBV01-01	TCRBJ01-03	58	0	0	5	0	0	53
CTCSADLGTGQLYF	TCRBV01-01	TCRBJ02-02	58	0	0	0	0	0	58
CTCSADQGDHEQYF	TCRBV01-01	TCRBJ02-07	58	0	0	0	0	0	58
CTCSADRDRAEQYF	TCRBV01-01	TCRBJ02-07	58	0	0	0	0	0	58
CTCSADRGANTEVFF	TCRBV01-01	TCRBJ01-01	58	6	0	34	0	0	18
CTCSADRGGSSYEQYF	TCRBV01-01	TCRBJ02-07	58	0	0	0	0	0	58
CTCSADRREQYF	TCRBV01-01	TCRBJ02-07	58	0	0	0	0	0	58
CTCSADRRNTEVFF	TCRBV01-01	TCRBJ01-01	58	0	0	6	30	22	0
CTCSADTGGNYAEQFF	TCRBV01-01	TCRBJ02-01	58	0	0	0	0	0	58
CTCSAGNSPLYF	TCRBV01-01	TCRBJ01-06	58	9	0	0	0	15	34
CTCSAGTGNYAEQFF	TCRBV01-01	TCRBJ02-01	58	0	0	38	0	20	0
CTCSAGVTEVFF	TCRBV01-01	TCRBJ01-01	58	0	0	58	0	0	0
CTCSARDRDYAEQFF	TCRBV01-01	TCRBJ02-01	58	0	0	0	58	0	0
CTCSARGLEVFF	TCRBV01-01	TCRBJ01-01	58	0	0	0	58	0	0
CTCSGGHQNTGQLYF	TCRBV01-01	TCRBJ02-02	58	0	0	0	0	0	58
CASGDAGGGAEQFF	TCRBV13-02	TCRBJ02-01	57	10	4	0	39	4	0
CASGDGNSGNTLYF	TCRBV13-02	TCRBJ01-03	57	0	57	0	0	0	0
CASGDRGDSDYTF	TCRBV13-02	TCRBJ01-02	57	5	42	0	10	0	0
CASGDRGNTEVFF	TCRBV13-02	TCRBJ01-01	57	0	0	19	16	0	22
CASGDRYEQYF	TCRBV13-02	TCRBJ02-07	57	0	25	6	0	26	0
CASSDLGGPYEQYF	TCRBV13-01	TCRBJ02-07	57	0	0	27	30	0	0
CASSDWGGAETLYF	TCRBV13-01	TCRBJ02-03	57	0	0	0	14	28	15
CASSFGQSAETLYF	TCRBV15-01	TCRBJ02-03	57	0	0	0	0	57	0
CASSLDGYEQYF	TCRBV03-01	TCRBJ02-07	57	18	0	20	0	19	0
CASSLDNNERLFF	TCRBV12-01	TCRBJ01-04	57	0	0	4	0	0	53
CASSLDWGNYAEQFF	TCRBV03-01	TCRBJ02-01	57	9	7	0	12	10	19
CASSLDWGSQNTLYF	TCRBV16-01	TCRBJ02-04	57	0	0	0	38	0	19
CASSLEDSGNTLYF	TCRBV12-01	TCRBJ01-03	57	11	0	0	46	0	0
CASSLGGANSDYTF	TCRBV12-01	TCRBJ01-02	57	0	34	10	0	13	0
CASSLGGEQYF	TCRBV16-01	TCRBJ02-07	57	0	7	27	0	23	0
CASSLGGNSDYTF	TCRBV16-01	TCRBJ01-02	57	28	0	5	24	0	0
CASSLGLGGYEQYF	TCRBV03-01	TCRBJ02-07	57	0	26	0	0	31	0
CASSLGQGVFF	TCRBV03-01	TCRBJ01-01	57	0	0	0	57	0	0
CASSLGTGDNQAPLF	TCRBV03-01	TCRBJ01-05	57	0	0	0	57	0	0
CASSLGTGYEQYF	TCRBV16-01	TCRBJ02-07	57	0	0	0	31	0	26
CASSLGVSYEQYF	TCRBV03-01	TCRBJ02-07	57	5	35	0	0	17	0
CASSLGWGASAETLYF	TCRBV12-01	TCRBJ02-03	57	0	0	57	0	0	0
CASSLRGNSGNTLYF	TCRBV03-01	TCRBJ01-03	57	0	0	22	35	0	0
CASSLSSDYTF	TCRBV03-01	TCRBJ01-02	57	0	57	0	0	0	0
CASSPRQVSNERLFF	TCRBV05-01	TCRBJ01-04	57	0	0	0	0	16	41
CASSQDGTGDTQYF	TCRBV02-01	TCRBJ02-05	57	0	0	23	0	0	34
CASSQDLGSQNTLYF	TCRBV02-01	TCRBJ02-04	57	0	0	6	0	5	46
CASSQGYEQYF	TCRBV05-01	TCRBJ02-07	57	0	4	53	0	0	0
CASSQQQGMTEVFF	TCRBV12-02	TCRBJ01-01	57	0	0	57	0	0	0
CASSQSGGYEQYF	TCRBV05-01	TCRBJ02-07	57	0	0	11	46	0	0
CASSQTISNERLFF	TCRBV05-01	TCRBJ01-04	57	12	0	0	45	0	0
CASSRGANYAEQFF	TCRBV19-01	TCRBJ02-01	57	0	0	0	0	57	0
CASSRLGSSYEQYF	TCRBV16-01	TCRBJ02-07	57	0	0	0	57	0	0
CASSSGQGYEQYF	TCRBV15-01	TCRBJ02-07	57	0	27	15	0	0	15
CASSSNSDYTF	TCRBV29-01	TCRBJ01-02	57	0	0	10	26	21	0
CASSSTGGYAEQFF	TCRBV04-01	TCRBJ02-01	57	11	0	0	34	12	0
CASSTLGGAHTGQLYF	TCRBV19-01	TCRBJ02-02	57	0	0	0	57	0	0
CASSWGSAETLYF	TCRBV19-01	TCRBJ02-03	57	14	0	0	43	0	0
CASSYGNTGQLYF	TCRBV04-01	TCRBJ02-02	57	12	0	0	45	0	0
CASSYGTANTEVFF	TCRBV16-01	TCRBJ01-01	57	0	0	0	0	0	57
CAWRGSSYEQYF	TCRBV31-01	TCRBJ02-07	57	0	0	0	0	0	57
CAWSGGSYEQYF	TCRBV31-01	TCRBJ02-07	57	0	0	0	57	0	0
CGARDNYEQYF	TCRBV20-01	TCRBJ02-07	57	0	9	0	27	0	21
CGARDWGGSYEQYF	TCRBV20-01	TCRBJ02-07	57	10	0	0	0	29	18
CTCSAAGFSNERLFF	TCRBV01-01	TCRBJ01-04	57	0	0	0	57	0	0
CTCSADGGGNQAPLF	TCRBV01-01	TCRBJ01-05	57	0	57	0	0	0	0
CTCSADGQYEQYF	TCRBV01-01	TCRBJ02-07	57	0	0	0	57	0	0
CTCSADPGGTGQLYF	TCRBV01-01	TCRBJ02-02	57	0	0	0	0	0	57
CTCSADPGTEVFF	TCRBV01-01	TCRBJ01-01	57	0	0	0	57	0	0
CTCSADRGAETLYF	TCRBV01-01	TCRBJ02-03	57	0	0	0	0	0	57
CTCSADRGSQNTLYF	TCRBV01-01	TCRBJ02-04	57	10	40	0	7	0	0
CTCSAGLGSSYEQYF	TCRBV01-01	TCRBJ02-07	57	0	0	0	0	0	57
CTCSAGNNNQAPLF	TCRBV01-01	TCRBJ01-05	57	0	0	0	57	0	0
CTCSAGNTGQLYF	TCRBV01-01	TCRBJ02-02	57	11	30	8	8	0	0
CTCSAGQNSDYTF	TCRBV01-01	TCRBJ01-02	57	0	17	40	0	0	0
CTCSATNANSDYTF	TCRBV01-01	TCRBJ01-02	57	0	57	0	0	0	0
CTCSGGLGGLAEQFF	TCRBV01-01	TCRBJ02-01	57	0	0	0	0	57	0
CASGDAGTGGYEQYF	TCRBV13-02	TCRBJ02-07	56	9	13	0	14	20	0
CASGDAQGTGQLYF	TCRBV13-02	TCRBJ02-02	56	0	0	44	0	12	0
CASGDRTANSDYTF	TCRBV13-02	TCRBJ01-02	56	0	0	0	0	14	42
CASGDVDTGQLYF	TCRBV13-02	TCRBJ02-02	56	56	0	0	0	0	0
CASGERQTEVFF	TCRBV13-02	TCRBJ01-01	56	0	0	0	0	0	56
CASGERSSYEQYF	TCRBV13-02	TCRBJ02-07	56	0	0	0	20	0	36
CASNRDRGTNERLFF	TCRBV29-01	TCRBJ01-04	56	0	0	0	56	0	0
CASRGQYEQYF	TCRBV29-01	TCRBJ02-07	56	0	0	0	56	0	0
CASSARGTEVFF	TCRBV13-01	TCRBJ01-01	56	56	0	0	0	0	0
CASSDAGTGGETLYF	TCRBV13-01	TCRBJ02-03	56	0	5	0	0	0	51
CASSDDQDTQYF	TCRBV13-01	TCRBJ02-05	56	6	0	12	26	12	0
CASSDGGTEVFF	TCRBV13-01	TCRBJ01-01	56	0	0	24	12	20	0
CASSDNYEQYF	TCRBV13-03	TCRBJ02-07	56	19	0	18	0	19	0
CASSDTGLGGGTQYF	TCRBV13-01	TCRBJ02-05	56	0	0	0	0	6	50
CASSENQAPLF	TCRBV13-01	TCRBJ01-05	56	0	0	7	0	0	49
CASSFDKYEQYF	TCRBV03-01	TCRBJ02-07	56	0	0	0	56	0	0
CASSHSGNTLYF	TCRBV12-01	TCRBJ01-03	56	20	0	0	0	0	36
CASSLAGRSAETLYF	TCRBV12-02	TCRBJ02-03	56	0	0	0	0	0	56
CASSLALPANTGQLYF	TCRBV12-01	TCRBJ02-02	56	0	0	0	0	0	56
CASSLDWEYEQYF	TCRBV12-02	TCRBJ02-07	56	0	0	10	0	46	0
CASSLDWGGYEQYF	TCRBV12-02	TCRBJ02-07	56	0	29	27	0	0	0
CASSLEGGGYEQYF	TCRBV16-01	TCRBJ02-07	56	0	0	56	0	0	0
CASSLGGRYEQYF	TCRBV03-01	TCRBJ02-07	56	0	31	0	0	25	0
CASSLGQNTEVFF	TCRBV29-01	TCRBJ01-01	56	0	12	24	0	12	8
CASSLGTGAYEQYF	TCRBV12-01	TCRBJ02-07	56	0	4	0	0	28	24
CASSLGTGGYAEQFF	TCRBV12-01	TCRBJ02-01	56	0	4	19	33	0	0
CASSLPANSDYTF	TCRBV12-01	TCRBJ01-02	56	16	0	0	0	0	40
CASSLQGAYSDYTF	TCRBV29-01	TCRBJ01-02	56	0	0	0	0	0	56
CASSLRQNTEVFF	TCRBV14-01	TCRBJ01-01	56	0	0	0	0	0	56
CASSLSDTLYF	TCRBV12-02	TCRBJ01-03	56	0	0	0	56	0	0
CASSLSGQGSAETLYF	TCRBV29-01	TCRBJ02-03	56	0	40	0	0	16	0
CASSPDRYEQYF	TCRBV03-01	TCRBJ02-07	56	13	0	0	43	0	0
CASSPDWGYEQYF	TCRBV12-01	TCRBJ02-07	56	4	0	0	20	0	32
CASSPGQGAETLYF	TCRBV29-01	TCRBJ02-03	56	9	0	0	37	10	0
CASSPLGGYEQYF	TCRBV12-01	TCRBJ02-07	56	0	0	0	0	0	56
CASSQDRDWGYEQYF	TCRBV02-01	TCRBJ02-07	56	0	4	0	11	41	0
CASSQDRVSGNTLYF	TCRBV02-01	TCRBJ01-03	56	0	28	0	0	0	28
CASSQDSSSGNTLYF	TCRBV02-01	TCRBJ01-03	56	0	5	0	0	0	51
CASSQDWESSYEQYF	TCRBV05-01	TCRBJ02-07	56	0	0	0	16	0	40
CASSQDWGNYAEQFF	TCRBV02-01	TCRBJ02-01	56	0	5	14	37	0	0
CASSQEGDWGYEQYF	TCRBV05-01	TCRBJ02-07	56	0	31	25	0	0	0
CASSQELNSNERLFF	TCRBV05-01	TCRBJ01-04	56	0	0	0	56	0	0
CASSQESAETLYF	TCRBV02-01	TCRBJ02-03	56	12	0	0	44	0	0
CASSQTGGEQYF	TCRBV02-01	TCRBJ02-07	56	15	0	4	0	0	37
CASSQTSNQDTQYF	TCRBV02-01	TCRBJ02-05	56	0	56	0	0	0	0
CASSRDNYAEQFF	TCRBV04-01	TCRBJ02-01	56	0	0	17	39	0	0
CASSRDRYEQYF	TCRBV19-01	TCRBJ02-07	56	0	0	0	0	0	56
CASSSDWGNYAEQFF	TCRBV04-01	TCRBJ02-01	56	0	16	0	21	0	19
CASSSGKNSDYTF	TCRBV03-01	TCRBJ01-02	56	0	0	0	0	0	56
CASSTGSSYEQYF	TCRBV19-01	TCRBJ02-07	56	0	7	0	0	15	34
CAWKENSGNTLYF	TCRBV31-01	TCRBJ01-03	56	0	0	0	0	0	56
CAWSLSGDSYEQYF	TCRBV31-01	TCRBJ02-07	56	0	0	0	56	0	0
CAWSQNTLYF	TCRBV31-01	TCRBJ02-04	56	16	24	0	0	0	16
CTCSAASSGNTLYF	TCRBV01-01	TCRBJ01-03	56	0	0	0	56	0	0
CTCSAERQGSEQYF	TCRBV01-01	TCRBJ02-07	56	0	0	0	0	0	56
CTCSAGATEVFF	TCRBV01-01	TCRBJ01-01	56	30	0	26	0	0	0
CTCSAGGDTQYF	TCRBV01-01	TCRBJ02-05	56	0	56	0	0	0	0
CTCSAGLGNYAEQFF	TCRBV01-01	TCRBJ02-01	56	0	0	0	56	0	0
CTCSAGSGNTLYF	TCRBV01-01	TCRBJ01-03	56	6	0	0	10	40	0
CTCSAGTGGYAEQFF	TCRBV01-01	TCRBJ02-01	56	20	7	0	23	6	0
CTCSARQISNERLFF	TCRBV01-01	TCRBJ01-04	56	0	0	0	56	0	0
CTCSGGGSYEQYF	TCRBV01-01	TCRBJ02-07	56	0	0	0	0	56	0
CASGAGGQNTLYF	TCRBV13-02	TCRBJ02-04	55	4	8	0	36	7	0
CASGDAEQFF	TCRBV13-02	TCRBJ02-01	55	11	0	17	16	5	6
CASGDSFSNERLFF	TCRBV13-02	TCRBJ01-04	55	19	0	0	8	10	18
CASGEGEQYF	TCRBV13-02	TCRBJ02-07	55	10	7	0	28	10	0
CASGGGQGSYEQYF	TCRBV13-02	TCRBJ02-07	55	0	0	0	35	0	20
CASGVGLSSAETLYF	TCRBV13-02	TCRBJ02-03	55	0	0	0	55	0	0
CASRDSSNERLFF	TCRBV13-03	TCRBJ01-04	55	0	0	0	9	0	46
CASRGTGGYEQYF	TCRBV19-01	TCRBJ02-07	55	0	18	0	24	13	0
CASSAYEQYF	TCRBV04-01	TCRBJ02-07	55	15	0	40	0	0	0
CASSDAAGYEQYF	TCRBV13-01	TCRBJ02-07	55	0	0	0	0	0	55
CASSDARDRVNERLFF	TCRBV13-01	TCRBJ01-04	55	0	0	0	0	0	55
CASSDGGSSYEQYF	TCRBV13-03	TCRBJ02-07	55	0	20	23	12	0	0
CASSDGYEQYF	TCRBV13-03	TCRBJ02-07	55	0	0	2	32	0	21
CASSDRGGNSDYTF	TCRBV13-03	TCRBJ01-02	55	0	0	0	45	10	0
CASSDRHYEQYF	TCRBV13-01	TCRBJ02-07	55	0	0	0	55	0	0
CASSERSSYEQYF	TCRBV13-01	TCRBJ02-07	55	0	0	0	0	0	55
CASSGAEQFF	TCRBV13-01	TCRBJ02-01	55	0	0	10	0	0	45
CASSIRDTQYF	TCRBV19-01	TCRBJ02-05	55	0	26	0	16	9	4
CASSLDRGSYEQYF	TCRBV03-01	TCRBJ02-07	55	0	0	0	55	0	0
CASSLEGAQDTQYF	TCRBV03-01	TCRBJ02-05	55	0	0	0	55	0	0
CASSLGGFEQYF	TCRBV03-01	TCRBJ02-07	55	0	0	0	0	0	55
CASSLGGGQDTQYF	TCRBV16-01	TCRBJ02-05	55	2	0	12	15	26	0
CASSLGGGYAEQFF	TCRBV12-01	TCRBJ02-01	55	18	0	10	23	4	0
CASSLGGSSAETLYF	TCRBV12-02	TCRBJ02-03	55	0	0	0	4	0	51
CASSLGLGEQYF	TCRBV03-01	TCRBJ02-07	55	0	0	0	0	0	55
CASSLGQGASDYTF	TCRBV12-02	TCRBJ01-02	55	0	0	0	0	55	0
CASSLQETLYF	TCRBV29-01	TCRBJ02-03	55	0	0	0	55	0	0
CASSLQGSNERLFF	TCRBV03-01	TCRBJ01-04	55	4	16	20	15	0	0
CASSLRANSDYTF	TCRBV12-01	TCRBJ01-02	55	17	0	30	0	8	0
CASSLRISNERLFF	TCRBV03-01	TCRBJ01-04	55	9	0	0	0	46	0
CASSLVDSGNTLYF	TCRBV16-01	TCRBJ01-03	55	12	22	15	6	0	0
CASSLVGNSDYTF	TCRBV16-01	TCRBJ01-02	55	0	16	15	0	24	0
CASSLVWGINQDTQYF	TCRBV12-01	TCRBJ02-05	55	0	55	0	0	0	0
CASSPGTGWEQYF	TCRBV03-01	TCRBJ02-07	55	0	0	0	0	0	55
CASSQDPSYEQYF	TCRBV02-01	TCRBJ02-07	55	0	15	0	0	0	40
CASSQDSNERLFF	TCRBV02-01	TCRBJ01-04	55	10	15	15	0	0	15
CASSQEGGRAETLYF	TCRBV02-01	TCRBJ02-03	55	0	0	12	4	0	39
CASSQERAPNTGQLYF	TCRBV02-01	TCRBJ02-02	55	0	0	55	0	0	0
CASSQTGGSSYEQYF	TCRBV13-01	TCRBJ02-07	55	0	0	0	0	0	55
CASSRDHYEQYF	TCRBV14-01	TCRBJ02-07	55	0	0	0	0	0	55
CASSRQNNQAPLF	TCRBV13-01	TCRBJ01-05	55	0	55	0	0	0	0
CASSSRNSGNTLYF	TCRBV29-01	TCRBJ01-03	55	55	0	0	0	0	0
CAWSLGGDEQYF	TCRBV31-01	TCRBJ02-07	55	0	0	0	55	0	0
CAWSLGNTEVFF	TCRBV31-01	TCRBJ01-01	55	0	0	22	0	33	0
CAWSLGQAPLF	TCRBV31-01	TCRBJ01-05	55	10	0	0	45	0	0
CAWSLRGNTEVFF	TCRBV31-01	TCRBJ01-01	55	0	0	0	55	0	0
CAWSPGENTGQLYF	TCRBV31-01	TCRBJ02-02	55	0	55	0	0	0	0
CGARDWGGAETLYF	TCRBV20-01	TCRBJ02-03	55	5	0	5	45	0	0
CGARQISNERLFF	TCRBV20-01	TCRBJ01-04	55	6	0	19	22	8	0
CTCSAADSSNERLFF	TCRBV01-01	TCRBJ01-04	55	0	0	0	0	0	55
CTCSADRTSAETLYF	TCRBV01-01	TCRBJ02-03	55	0	0	0	0	0	55
CTCSADRYNSPLYF	TCRBV01-01	TCRBJ01-06	55	0	0	0	27	7	21
CTCSADSYNSPLYF	TCRBV01-01	TCRBJ01-06	55	6	2	25	22	0	0
CTCSAGDSNERLFF	TCRBV01-01	TCRBJ01-04	55	0	27	0	0	0	28
CTCSAGQGYEQYF	TCRBV01-01	TCRBJ02-07	55	0	0	0	11	44	0
CTCSAGSQNTLYF	TCRBV01-01	TCRBJ02-04	55	26	0	0	7	22	0
CTCSARLGGNEQYF	TCRBV01-01	TCRBJ02-07	55	0	0	0	55	0	0
CTCSARNSDYTF	TCRBV01-01	TCRBJ01-02	55	0	15	0	0	40	0
CTCSARYNNQAPLF	TCRBV01-01	TCRBJ01-05	55	0	0	0	0	0	55
CTCSASDNNQAPLF	TCRBV01-01	TCRBJ01-05	55	0	0	55	0	0	0
CTCSASGTGEPETLYF	TCRBV01-01	TCRBJ02-03	55	0	0	0	0	0	55
CTCSAVAGGEQYF	TCRBV01-01	TCRBJ02-07	55	0	0	0	0	0	55
CTCSRDRGRERLFF	TCRBV01-01	TCRBJ01-04	55	0	0	0	0	0	55
CTCSVRDTYAEQFF	TCRBV01-01	TCRBJ02-01	55	0	0	0	55	0	0
CTCSWDRENERLFF	TCRBV01-01	TCRBJ01-04	55	0	0	0	55	0	0
CAIRDNTEVFF	TCRBV19-01	TCRBJ01-01	54	54	0	0	0	0	0
CASGDAGVYEQYF	TCRBV13-02	TCRBJ02-07	54	0	0	0	37	17	0
CASGDDSSGNTLYF	TCRBV13-02	TCRBJ01-03	54	0	13	0	0	17	24
CASGDDWGGYEQYF	TCRBV13-02	TCRBJ02-07	54	0	14	17	16	7	0
CASGDWGGYAEQFF	TCRBV13-02	TCRBJ02-01	54	4	11	6	20	0	13
CASGEGQSGNTLYF	TCRBV13-02	TCRBJ01-03	54	0	0	0	0	30	24
CASRDWGDEQYF	TCRBV16-01	TCRBJ02-07	54	0	0	0	0	0	54
CASRGQAPLF	TCRBV29-01	TCRBJ01-05	54	0	0	0	0	0	54
CASRGSGNTLYF	TCRBV03-01	TCRBJ01-03	54	0	0	0	34	20	0
CASSANTGQLYF	TCRBV04-01	TCRBJ02-02	54	0	0	54	0	0	0
CASSDAGGSYEQYF	TCRBV13-01	TCRBJ02-07	54	5	0	4	20	0	25
CASSDSGYEQYF	TCRBV13-03	TCRBJ02-07	54	0	0	28	26	0	0
CASSDVGISNERLFF	TCRBV13-01	TCRBJ01-04	54	0	0	0	54	0	0
CASSEGQSYEQYF	TCRBV13-03	TCRBJ02-07	54	0	0	19	35	0	0
CASSENSYEQYF	TCRBV13-01	TCRBJ02-07	54	0	0	0	0	0	54
CASSETLNNQAPLF	TCRBV13-01	TCRBJ01-05	54	0	0	0	0	0	54
CASSFRGNQDTQYF	TCRBV03-01	TCRBJ02-05	54	0	0	0	33	0	21
CASSLAGGSSYEQYF	TCRBV03-01	TCRBJ02-07	54	0	0	0	0	0	54
CASSLDNYAEQFF	TCRBV03-01	TCRBJ02-01	54	0	32	6	0	0	16
CASSLDRNTEVFF	TCRBV03-01	TCRBJ01-01	54	0	27	27	0	0	0
CASSLDRVGSDYTF	TCRBV12-01	TCRBJ01-02	54	0	0	0	0	0	54
CASSLEGANSDYTF	TCRBV16-01	TCRBJ01-02	54	0	0	17	0	0	37
CASSLEGDEQYF	TCRBV12-01	TCRBJ02-07	54	0	16	18	0	20	0
CASSLGDWGYEQYF	TCRBV15-01	TCRBJ02-07	54	0	0	0	8	9	37
CASSLGGTEVFF	TCRBV03-01	TCRBJ01-01	54	30	0	0	0	24	0
CASSLGLGGLEQYF	TCRBV04-01	TCRBJ02-07	54	10	0	0	44	0	0
CASSLGPANSDYTF	TCRBV12-01	TCRBJ01-02	54	0	0	14	4	6	30
CASSLGQNYAEQFF	TCRBV29-01	TCRBJ02-01	54	0	0	26	0	0	28
CASSLGQYEQYF	TCRBV14-01	TCRBJ02-07	54	17	0	9	0	28	0
CASSLGTGAYEQYF	TCRBV03-01	TCRBJ02-07	54	0	0	0	14	40	0
CASSLGTGVYEQYF	TCRBV03-01	TCRBJ02-07	54	4	0	24	22	0	4
CASSLNTGQLYF	TCRBV03-01	TCRBJ02-02	54	0	0	14	0	0	40
CASSLRDEQYF	TCRBV12-01	TCRBJ02-07	54	0	0	0	0	0	54
CASSLSANSDYTF	TCRBV03-01	TCRBJ01-02	54	0	0	0	35	19	0
CASSLTANSDYTF	TCRBV04-01	TCRBJ01-02	54	0	15	0	0	0	39
CASSLTISGNTLYF	TCRBV04-01	TCRBJ01-03	54	0	0	0	19	0	35
CASSLVVGGLNTGQLYF	TCRBV16-01	TCRBJ02-02	54	0	0	0	0	0	54
CASSPAGVSYEQYF	TCRBV16-01	TCRBJ02-07	54	0	0	54	0	0	0
CASSPGLGGLEQYF	TCRBV12-02	TCRBJ02-07	54	0	0	0	35	0	19
CASSPGQGVEQYF	TCRBV13-01	TCRBJ02-07	54	0	0	0	0	0	54
CASSPGTGGYAEQFF	TCRBV29-01	TCRBJ02-01	54	0	7	11	0	11	25
CASSPTGGYAEQFF	TCRBV05-01	TCRBJ02-01	54	0	12	0	40	0	2
CASSQAGSYAEQFF	TCRBV02-01	TCRBJ02-01	54	0	0	0	29	0	25
CASSQAGTGGYEQYF	TCRBV05-01	TCRBJ02-07	54	22	0	0	0	32	0
CASSQDLGDSYEQYF	TCRBV05-01	TCRBJ02-07	54	0	4	0	0	50	0
CASSQEAETLYF	TCRBV02-01	TCRBJ02-03	54	0	0	0	0	0	54
CASSQGTDYEQYF	TCRBV02-01	TCRBJ02-07	54	0	0	29	6	19	0
CASSQTDYEQYF	TCRBV12-01	TCRBJ02-07	54	0	0	0	0	0	54
CASSQTVYEQYF	TCRBV29-01	TCRBJ02-07	54	0	0	0	0	0	54
CASSRDRNREYAEQFF	TCRBV17-01	TCRBJ02-01	54	0	0	0	0	0	54
CASSSGDSSYEQYF	TCRBV17-01	TCRBJ02-07	54	0	0	0	0	0	54
CASSSGLVYAEQFF	TCRBV16-01	TCRBJ02-01	54	0	33	0	21	0	0
CASSSGQTNSDYTF	TCRBV16-01	TCRBJ01-02	54	0	0	0	0	0	54
CASSSSGNTLYF	TCRBV29-01	TCRBJ01-03	54	0	0	0	54	0	0
CASSWDWGTETLYF	TCRBV16-01	TCRBJ02-03	54	0	0	0	0	0	54
CAWPFRDSFAETLYF	TCRBV31-01	TCRBJ02-03	54	0	54	0	0	0	0
CAWRREGYNYAEQFF	TCRBV31-01	TCRBJ02-01	54	0	0	0	0	0	54
CAWSGIYEQYF	TCRBV31-01	TCRBJ02-07	54	0	0	0	0	54	0
CAWSLGVEQYF	TCRBV31-01	TCRBJ02-07	54	0	54	0	0	0	0
CGARGGLYEQYF	TCRBV20-01	TCRBJ02-07	54	0	0	0	54	0	0
CTCRRDSQDTQYF	TCRBV01-01	TCRBJ02-05	54	0	0	0	0	0	54
CTCRTRDRGSGNTLYF	TCRBV01-01	TCRBJ01-03	54	0	0	0	54	0	0
CTCSAALNNQAPLF	TCRBV01-01	TCRBJ01-05	54	0	0	0	54	0	0
CTCSAAQGGNTLYF	TCRBV01-01	TCRBJ01-03	54	0	0	0	0	0	54
CTCSADGGKVFF	TCRBV01-01	TCRBJ01-01	54	0	0	0	54	0	0
CTCSADLRAGNTLYF	TCRBV01-01	TCRBJ01-03	54	23	0	31	0	0	0
CTCSAEGRDNQAPLF	TCRBV01-01	TCRBJ01-05	54	0	0	0	54	0	0
CTCSAGPNTEVFF	TCRBV01-01	TCRBJ01-01	54	30	0	0	0	24	0
CTCSAGQDTQYF	TCRBV01-01	TCRBJ02-05	54	8	5	8	25	8	0
CTCSAGTANTEVFF	TCRBV01-01	TCRBJ01-01	54	0	22	0	14	18	0
CTCSAGTGGDERLFF	TCRBV01-01	TCRBJ01-04	54	26	0	0	0	0	28
CTCSAGTGGTGQLYF	TCRBV01-01	TCRBJ02-02	54	8	0	10	0	36	0
CTCSAGTGVYEQYF	TCRBV01-01	TCRBJ02-07	54	0	0	0	0	40	14
CTCSAHNNQAPLF	TCRBV01-01	TCRBJ01-05	54	0	0	0	54	0	0
CTCSAQANTEVFF	TCRBV01-01	TCRBJ01-01	54	0	0	0	0	54	0
CTCSARDSSYEQYF	TCRBV01-01	TCRBJ02-07	54	0	0	0	54	0	0
CTCSATGGAKNTLYF	TCRBV01-01	TCRBJ02-04	54	0	0	0	54	0	0
CTCSAVGQGNERLFF	TCRBV01-01	TCRBJ01-04	54	0	0	0	54	0	0
CTCSAVQGSEQYF	TCRBV01-01	TCRBJ02-07	54	0	0	0	0	0	54
LCQQSGRQAPLF	TCRBV26-01	TCRBJ01-05	54	0	0	54	0	0	0
CASGAGSGNTLYF	TCRBV13-02	TCRBJ01-03	53	0	32	0	0	0	21
CASGDAGIEQYF	TCRBV13-02	TCRBJ02-07	53	0	0	24	29	0	0
CASGEREQYF	TCRBV13-02	TCRBJ02-07	53	0	26	0	27	0	0
CASRDISNERLFF	TCRBV29-01	TCRBJ01-04	53	0	0	0	0	0	53
CASRGQGYEQYF	TCRBV03-01	TCRBJ02-07	53	0	0	26	27	0	0
CASSDARYEQYF	TCRBV13-03	TCRBJ02-07	53	4	4	0	0	45	0
CASSDGWGGEQYF	TCRBV13-01	TCRBJ02-07	53	0	43	10	0	0	0
CASSDNGQSSYEQYF	TCRBV13-01	TCRBJ02-07	53	0	0	0	0	0	53
CASSFGNQAPLF	TCRBV03-01	TCRBJ01-05	53	0	0	27	26	0	0
CASSIEGTEVFF	TCRBV19-01	TCRBJ01-01	53	36	0	0	8	9	0
CASSIGDRGYEQYF	TCRBV19-01	TCRBJ02-07	53	9	0	0	44	0	0
CASSIWGGAETLYF	TCRBV19-01	TCRBJ02-03	53	0	0	14	27	0	12
CASSLAGDEQYF	TCRBV03-01	TCRBJ02-07	53	0	9	0	23	21	0
CASSLAGGDEQYF	TCRBV16-01	TCRBJ02-07	53	0	0	0	53	0	0
CASSLDWGDSAETLYF	TCRBV12-02	TCRBJ02-03	53	0	0	0	53	0	0
CASSLDWGVEQYF	TCRBV04-01	TCRBJ02-07	53	0	0	0	0	0	53
CASSLEPVSYEQYF	TCRBV12-01	TCRBJ02-07	53	0	0	0	0	0	53
CASSLEYEQYF	TCRBV03-01	TCRBJ02-07	53	0	0	0	0	11	42
CASSLGGALEQYF	TCRBV03-01	TCRBJ02-07	53	0	0	21	0	0	32
CASSLGGNSDYTF	TCRBV12-02	TCRBJ01-02	53	0	0	44	9	0	0
CASSLGGVSGNTLYF	TCRBV03-01	TCRBJ01-03	53	0	0	9	0	0	44
CASSLGLSGNTLYF	TCRBV12-01	TCRBJ01-03	53	0	4	10	0	0	39
CASSLGNEQYF	TCRBV16-01	TCRBJ02-07	53	0	0	0	15	0	38
CASSLGTASAETLYF	TCRBV03-01	TCRBJ02-03	53	0	18	0	0	0	35
CASSLRTGGYEQYF	TCRBV03-01	TCRBJ02-07	53	6	16	13	0	0	18
CASSLVGGSSYEQYF	TCRBV16-01	TCRBJ02-07	53	0	0	0	34	0	19
CASSLWGSSAETLYF	TCRBV15-01	TCRBJ02-03	53	0	0	0	32	0	21
CASSPGLGNTGQLYF	TCRBV04-01	TCRBJ02-02	53	40	0	13	0	0	0
CASSPGQGTSDYTF	TCRBV29-01	TCRBJ01-02	53	0	53	0	0	0	0
CASSPGQNSDYTF	TCRBV12-01	TCRBJ01-02	53	19	30	4	0	0	0
CASSPPGLGVYEQYF	TCRBV12-01	TCRBJ02-07	53	0	0	0	0	0	53
CASSPPSQNTLYF	TCRBV16-01	TCRBJ02-04	53	0	0	0	53	0	0
CASSPRAETLYF	TCRBV04-01	TCRBJ02-03	53	0	0	0	31	0	22
CASSPTGGYEQYF	TCRBV02-01	TCRBJ02-07	53	14	0	23	0	0	16
CASSQDPANSDYTF	TCRBV02-01	TCRBJ01-02	53	0	5	19	18	11	0
CASSQDTQYF	TCRBV04-01	TCRBJ02-05	53	0	0	39	14	0	0
CASSQGGTTNTEVFF	TCRBV02-01	TCRBJ01-01	53	0	0	0	0	0	53
CASSQGQGTGQLYF	TCRBV02-01	TCRBJ02-02	53	0	0	0	53	0	0
CASSQGYEQYF	TCRBV12-01	TCRBJ02-07	53	13	20	0	20	0	0
CASSQLGSAETLYF	TCRBV02-01	TCRBJ02-03	53	0	0	0	40	13	0
CASSSGQQNTLYF	TCRBV16-01	TCRBJ02-04	53	0	0	0	4	19	30
CAWSLRGGNQAPLF	TCRBV31-01	TCRBJ01-05	53	0	13	20	20	0	0
CSSSQTGTTNSDYTF	TCRBV23-01	TCRBJ01-02	53	0	0	0	0	0	53
CTCSADGGASAETLYF	TCRBV01-01	TCRBJ02-03	53	26	0	0	0	27	0
CTCSADRVSNERLFF	TCRBV01-01	TCRBJ01-04	53	0	37	7	0	9	0
CTCSAEAGNTEVFF	TCRBV01-01	TCRBJ01-01	53	46	0	0	7	0	0
CTCSAEQNQAPLF	TCRBV01-01	TCRBJ01-05	53	0	0	0	0	0	53
CTCSAERTGGFEQYF	TCRBV01-01	TCRBJ02-07	53	0	0	0	53	0	0
CTCSAGQGTERLFF	TCRBV01-01	TCRBJ01-04	53	0	19	0	34	0	0
CTCSAGQYAEQFF	TCRBV01-01	TCRBJ02-01	53	20	0	12	0	17	4
CTCSAGVDNQAPLF	TCRBV01-01	TCRBJ01-05	53	0	0	0	0	53	0
CTCSAGWGVGEQYF	TCRBV01-01	TCRBJ02-07	53	0	0	0	0	0	53
CTCSATGGQAPLF	TCRBV01-01	TCRBJ01-05	53	25	0	28	0	0	0
CTCSDWGWEQYF	TCRBV01-01	TCRBJ02-07	53	0	53	0	0	0	0
CTCSGGDTQYF	TCRBV01-01	TCRBJ02-05	53	0	17	0	0	0	36
CTCSHWDNYAEQFF	TCRBV01-01	TCRBJ02-01	53	0	0	0	53	0	0
CTCSPSGQDQAPLF	TCRBV01-01	TCRBJ01-05	53	0	53	0	0	0	0
CTCSTRQGRNQAPLF	TCRBV01-01	TCRBJ01-05	53	0	53	0	0	0	0
CASGDAQNTEVFF	TCRBV13-02	TCRBJ01-01	52	0	13	0	16	0	23
CASGDDEQYF	TCRBV13-02	TCRBJ02-07	52	13	5	12	22	0	0
CASGDEGYEQYF	TCRBV13-02	TCRBJ02-07	52	0	22	15	0	15	0
CASGDLGGYEQYF	TCRBV13-02	TCRBJ02-07	52	7	0	0	0	23	22
CASGDQGYEQYF	TCRBV13-02	TCRBJ02-07	52	20	0	4	0	28	0
CASGDRGSGNTLYF	TCRBV13-02	TCRBJ01-03	52	8	9	0	0	35	0
CASGDRVSNERLFF	TCRBV13-02	TCRBJ01-04	52	29	4	10	0	9	0
CASGERGEVFF	TCRBV13-02	TCRBJ01-01	52	0	0	0	0	52	0
CASGGTAYEQYF	TCRBV13-02	TCRBJ02-07	52	0	0	0	0	18	34
CASGSSYEQYF	TCRBV13-02	TCRBJ02-07	52	31	0	0	0	21	0
CASGTGGSDYTF	TCRBV13-02	TCRBJ01-02	52	0	0	0	0	0	52
CASRDWGAETLYF	TCRBV19-01	TCRBJ02-03	52	44	0	0	8	0	0
CASSCGAWDSDYTF	TCRBV29-01	TCRBJ01-02	52	0	0	0	0	0	52
CASSDAGDTQYF	TCRBV13-01	TCRBJ02-05	52	5	0	5	17	20	5
CASSDAGNTEVFF	TCRBV13-01	TCRBJ01-01	52	12	28	12	0	0	0
CASSDDRDEQYF	TCRBV13-03	TCRBJ02-07	52	0	0	0	0	0	52
CASSDGVEQYF	TCRBV13-01	TCRBJ02-07	52	0	0	0	0	32	20
CASSDGYSGNTLYF	TCRBV13-01	TCRBJ01-03	52	0	0	0	0	0	52
CASSDTGDEQYF	TCRBV13-01	TCRBJ02-07	52	17	6	0	0	29	0
CASSEGRRSQNTLYF	TCRBV13-01	TCRBJ02-04	52	0	0	0	52	0	0
CASSFGGGSAETLYF	TCRBV14-01	TCRBJ02-03	52	0	18	0	17	17	0
CASSGKYEQYF	TCRBV29-01	TCRBJ02-07	52	0	0	0	0	0	52
CASSGTGGGEQYF	TCRBV13-01	TCRBJ02-07	52	13	0	15	18	6	0
CASSHRVSNERLFF	TCRBV03-01	TCRBJ01-04	52	0	0	0	43	9	0
CASSHWTASAETLYF	TCRBV12-01	TCRBJ02-03	52	0	0	0	0	0	52
CASSIAQGNTEVFF	TCRBV19-01	TCRBJ01-01	52	0	4	6	0	7	35
CASSIGDTQYF	TCRBV19-01	TCRBJ02-05	52	11	4	2	27	8	0
CASSIRNSGNTLYF	TCRBV19-01	TCRBJ01-03	52	0	0	37	0	15	0
CASSLAGGYEQYF	TCRBV12-02	TCRBJ02-07	52	0	0	52	0	0	0
CASSLAKYEQYF	TCRBV16-01	TCRBJ02-07	52	17	0	0	35	0	0
CASSLDWGGYEQYF	TCRBV16-01	TCRBJ02-07	52	0	4	12	12	12	12
CASSLENSGNTLYF	TCRBV16-01	TCRBJ01-03	52	0	0	0	25	27	0
CASSLESSYEQYF	TCRBV16-01	TCRBJ02-07	52	0	35	17	0	0	0
CASSLEWGGSYEQYF	TCRBV12-01	TCRBJ02-07	52	0	0	0	52	0	0
CASSLGDSYEQYF	TCRBV12-02	TCRBJ02-07	52	0	13	32	0	7	0
CASSLGGSYEQYF	TCRBV12-01	TCRBJ02-07	52	11	14	0	6	21	0
CASSLGGSYEQYF	TCRBV16-01	TCRBJ02-07	52	39	4	0	0	0	9
CASSLGLGYEQYF	TCRBV12-02	TCRBJ02-07	52	0	28	0	24	0	0
CASSLGTGAYEQYF	TCRBV12-02	TCRBJ02-07	52	0	43	9	0	0	0
CASSLGTGDYEQYF	TCRBV12-02	TCRBJ02-07	52	0	0	0	7	0	45
CASSLGVSNERLFF	TCRBV16-01	TCRBJ01-04	52	8	0	18	0	26	0
CASSLLGGQDTQYF	TCRBV03-01	TCRBJ02-05	52	0	0	0	7	4	41
CASSLLGVGYEQYF	TCRBV04-01	TCRBJ02-07	52	0	52	0	0	0	0
CASSLPGYEQYF	TCRBV15-01	TCRBJ02-07	52	0	0	0	0	0	52
CASSLRGYEQYF	TCRBV03-01	TCRBJ02-07	52	0	11	0	0	41	0
CASSLRVEQYF	TCRBV03-01	TCRBJ02-07	52	0	0	52	0	0	0
CASSLTGINQAPLF	TCRBV12-02	TCRBJ01-05	52	0	0	52	0	0	0
CASSLVEQYF	TCRBV03-01	TCRBJ02-07	52	0	4	13	35	0	0
CASSLWAGGNYAEQFF	TCRBV12-02	TCRBJ02-01	52	0	52	0	0	0	0
CASSPGQISNERLFF	TCRBV12-01	TCRBJ01-04	52	0	0	14	38	0	0
CASSPGQSNERLFF	TCRBV05-01	TCRBJ01-04	52	0	10	0	0	4	38
CASSPQGNSDYTF	TCRBV29-01	TCRBJ01-02	52	0	0	0	52	0	0
CASSPSGNTLYF	TCRBV04-01	TCRBJ01-03	52	0	0	0	52	0	0
CASSPTGGRHEQYF	TCRBV12-02	TCRBJ02-07	52	0	0	0	0	0	52
CASSPTVSNERLFF	TCRBV04-01	TCRBJ01-04	52	4	0	17	25	6	0
CASSQDKYEQYF	TCRBV02-01	TCRBJ02-07	52	0	0	21	0	6	25
CASSQEGGSAETLYF	TCRBV02-01	TCRBJ02-03	52	13	15	0	0	24	0
CASSQEGNSGNTLYF	TCRBV02-01	TCRBJ01-03	52	17	17	0	18	0	0
CASSQGQNSDYTF	TCRBV02-01	TCRBJ01-02	52	10	17	8	17	0	0
CASSQGQNTEVFF	TCRBV05-01	TCRBJ01-01	52	25	4	0	10	13	0
CASSQGQYQAPLF	TCRBV12-01	TCRBJ01-05	52	0	0	0	0	0	52
CASSQGTPNSDYTF	TCRBV02-01	TCRBJ01-02	52	10	0	0	42	0	0
CASSQSYEQYF	TCRBV05-01	TCRBJ02-07	52	4	0	22	0	0	26
CASSQTSSNERLFF	TCRBV05-01	TCRBJ01-04	52	0	0	52	0	0	0
CASSRDSNYAEQFF	TCRBV19-01	TCRBJ02-01	52	4	8	0	0	0	40
CASSRDWGYEQYF	TCRBV12-01	TCRBJ02-07	52	10	0	7	0	0	35
CASSRQGGEQYF	TCRBV16-01	TCRBJ02-07	52	0	0	0	0	0	52
CASSSGNSDYTF	TCRBV15-01	TCRBJ01-02	52	0	0	0	30	22	0
CASSSNTGQLYF	TCRBV16-01	TCRBJ02-02	52	0	0	0	28	24	0
CASSTTGDEQYF	TCRBV19-01	TCRBJ02-07	52	0	0	0	25	0	27
CASSVRTGGYEQYF	TCRBV13-01	TCRBJ02-07	52	16	0	0	0	0	36
CASTGDNYEQYF	TCRBV29-01	TCRBJ02-07	52	0	0	0	52	0	0
CATSPGQGGNTLYF	TCRBV16-01	TCRBJ01-03	52	0	52	0	0	0	0
CAWSLDSNSDYTF	TCRBV31-01	TCRBJ01-02	52	0	0	0	52	0	0
CAWSLGDWGYEQYF	TCRBV31-01	TCRBJ02-07	52	18	0	0	10	24	0
CAWSLLANSDYTF	TCRBV31-01	TCRBJ01-02	52	0	0	0	52	0	0
CAWSLRGNYAEQFF	TCRBV31-01	TCRBJ02-01	52	13	0	0	10	13	16
CAWSLSQNQAPLF	TCRBV31-01	TCRBJ01-05	52	0	0	0	0	0	52
CAWSLWGSSYEQYF	TCRBV31-01	TCRBJ02-07	52	0	52	0	0	0	0
CGAGTVSNERLFF	TCRBV20-01	TCRBJ01-04	52	0	0	44	8	0	0
CGARDRGDTQYF	TCRBV20-01	TCRBJ02-05	52	0	0	4	0	19	29
CGARTGSSYEQYF	TCRBV20-01	TCRBJ02-07	52	20	4	28	0	0	0
CSSRTGGAPTLYF	TCRBV23-01	TCRBJ02-04	52	0	0	52	0	0	0
CTCSAAGLGLYEQYF	TCRBV01-01	TCRBJ02-07	52	0	0	0	0	52	0
CTCSAALDWTAEQFF	TCRBV01-01	TCRBJ02-01	52	0	0	0	0	0	52
CTCSADRDYAEQFF	TCRBV01-01	TCRBJ02-01	52	0	2	0	0	0	50
CTCSADRGANSDYTF	TCRBV01-01	TCRBJ01-02	52	17	0	0	0	0	35
CTCSADRGLEQYF	TCRBV01-01	TCRBJ02-07	52	19	0	0	33	0	0
CTCSADRTENTGQLYF	TCRBV01-01	TCRBJ02-02	52	0	0	52	0	0	0
CTCSADSAETLYF	TCRBV01-01	TCRBJ02-03	52	29	23	0	0	0	0
CTCSADSSSAETLYF	TCRBV01-01	TCRBJ02-03	52	0	0	0	0	52	0
CTCSAGGAYEQYF	TCRBV01-01	TCRBJ02-07	52	0	4	26	22	0	0
CTCSAGGRYEQYF	TCRBV01-01	TCRBJ02-07	52	0	0	52	0	0	0
CTCSAGQSSYEQYF	TCRBV01-01	TCRBJ02-07	52	0	0	0	27	25	0
CTCSAGTNNSPLYF	TCRBV01-01	TCRBJ01-06	52	0	0	25	27	0	0
CTCSAGWGAYEQYF	TCRBV01-01	TCRBJ02-07	52	0	14	0	38	0	0
CTCSAKNSDYTF	TCRBV01-01	TCRBJ01-02	52	0	0	0	0	0	52
CTCSARTGATGQLYF	TCRBV01-01	TCRBJ02-02	52	0	0	0	52	0	0
CTCSASGNSDYTF	TCRBV01-01	TCRBJ01-02	52	0	0	14	38	0	0
CTCSAVGGSAETLYF	TCRBV01-01	TCRBJ02-03	52	0	0	0	0	0	52
CTCSGDRNTEVFF	TCRBV01-01	TCRBJ01-01	52	0	0	0	10	0	42
CTCSGHNQAPLF	TCRBV01-01	TCRBJ01-05	52	0	45	0	0	7	0
CTCSGPDFNYAEQFF	TCRBV01-01	TCRBJ02-01	52	0	0	0	0	0	52
CTCSGQVNQDTQYF	TCRBV01-01	TCRBJ02-05	52	12	0	0	40	0	0
CTCSVETGVYAEQFF	TCRBV01-01	TCRBJ02-01	52	0	0	0	52	0	0
CARDWSNTGQLYF	TCRBV19-01	TCRBJ02-02	51	0	51	0	0	0	0
CASFRGEGEQYF	TCRBV13-01	TCRBJ02-07	51	0	0	0	0	51	0
CASGAGGQDTQYF	TCRBV13-02	TCRBJ02-05	51	0	7	0	44	0	0
CASGDAGAETLYF	TCRBV13-02	TCRBJ02-03	51	31	0	18	0	0	2
CASGDAGSGNTLYF	TCRBV13-02	TCRBJ01-03	51	8	0	10	33	0	0
CASGDARGGYEQYF	TCRBV13-02	TCRBJ02-07	51	0	27	0	24	0	0
CASGDASYEQYF	TCRBV13-02	TCRBJ02-07	51	4	0	11	27	9	0
CASGDDRDEQYF	TCRBV13-02	TCRBJ02-07	51	0	0	0	27	24	0
CASGDETGSSYEQYF	TCRBV13-02	TCRBJ02-07	51	0	26	0	25	0	0
CASGDGQGNTLYF	TCRBV13-02	TCRBJ02-04	51	0	51	0	0	0	0
CASGDPGGSAETLYF	TCRBV13-02	TCRBJ02-03	51	12	6	0	21	12	0
CASGDRGANSDYTF	TCRBV13-02	TCRBJ01-02	51	10	4	0	0	0	37
CASGDRGGSYEQYF	TCRBV13-02	TCRBJ02-07	51	0	0	16	35	0	0
CASGDRGQDTQYF	TCRBV13-02	TCRBJ02-05	51	13	4	15	8	11	0
CASGDRSSYEQYF	TCRBV13-02	TCRBJ02-07	51	22	0	0	0	0	29
CASGGGTGVGNTLYF	TCRBV13-02	TCRBJ01-03	51	0	24	0	27	0	0
CASGGQNSDYTF	TCRBV13-02	TCRBJ01-02	51	0	9	0	0	11	31
CASGTGGASSDYTF	TCRBV13-02	TCRBJ01-02	51	0	0	0	0	0	51
CASNSGNTLYF	TCRBV29-01	TCRBJ01-03	51	0	0	0	51	0	0
CASRDRGLEQYF	TCRBV13-03	TCRBJ02-07	51	0	0	0	24	0	27
CASRDRSSYEQYF	TCRBV13-03	TCRBJ02-07	51	0	0	0	45	6	0
CASRPTGGHAEQFF	TCRBV13-03	TCRBJ02-01	51	0	0	0	0	0	51
CASRRDSQQYF	TCRBV03-01	TCRBJ02-07	51	0	0	0	0	0	51
CASSAGQGGERLFF	TCRBV13-01	TCRBJ01-04	51	0	0	0	0	0	51
CASSDGGAYEQYF	TCRBV13-03	TCRBJ02-07	51	10	0	0	0	0	41
CASSDVGSAETLYF	TCRBV13-01	TCRBJ02-03	51	0	0	19	32	0	0
CASSDYEQYF	TCRBV13-03	TCRBJ02-07	51	0	0	23	0	28	0
CASSEGGSYEQYF	TCRBV13-01	TCRBJ02-07	51	0	6	0	26	0	19
CASSFQGGAPLF	TCRBV14-01	TCRBJ01-05	51	0	51	0	0	0	0
CASSGGQNTEVFF	TCRBV13-03	TCRBJ01-01	51	0	0	0	10	0	41
CASSGGQSGNTLYF	TCRBV13-03	TCRBJ01-03	51	0	28	0	23	0	0
CASSGLGGEYEQYF	TCRBV13-03	TCRBJ02-07	51	0	0	0	0	0	51
CASSGTGANSDYTF	TCRBV13-03	TCRBJ01-02	51	0	0	0	0	16	35
CASSIGGGAETLYF	TCRBV19-01	TCRBJ02-03	51	4	22	7	18	0	0
CASSIRGTGQLYF	TCRBV19-01	TCRBJ02-02	51	0	0	0	23	28	0
CASSLDANSDYTF	TCRBV12-01	TCRBJ01-02	51	0	0	34	17	0	0
CASSLDNNNQAPLF	TCRBV15-01	TCRBJ01-05	51	0	0	0	0	0	51
CASSLDRANSDYTF	TCRBV12-01	TCRBJ01-02	51	0	0	16	29	6	0
CASSLGDWGDEQYF	TCRBV16-01	TCRBJ02-07	51	0	0	19	6	0	26
CASSLGFSNERLFF	TCRBV29-01	TCRBJ01-04	51	0	0	0	0	0	51
CASSLGGDEQYF	TCRBV03-01	TCRBJ02-07	51	26	0	0	25	0	0
CASSLGGRSDYTF	TCRBV14-01	TCRBJ01-02	51	0	0	0	51	0	0
CASSLGGRSYEQYF	TCRBV15-01	TCRBJ02-07	51	0	0	0	51	0	0
CASSLGLGGLYAEQFF	TCRBV03-01	TCRBJ02-01	51	4	0	0	21	0	26
CASSLGQNERLFF	TCRBV16-01	TCRBJ01-04	51	0	0	40	0	11	0
CASSLGQNSDYTF	TCRBV12-01	TCRBJ01-02	51	10	0	5	0	36	0
CASSLGQNTGQLYF	TCRBV29-01	TCRBJ02-02	51	0	0	51	0	0	0
CASSLKGSSYEQYF	TCRBV03-01	TCRBJ02-07	51	0	0	0	0	0	51
CASSLLDSNERLFF	TCRBV12-01	TCRBJ01-04	51	0	0	0	35	16	0
CASSLTANSDYTF	TCRBV16-01	TCRBJ01-02	51	0	0	0	31	20	0
CASSLTGSAETLYF	TCRBV16-01	TCRBJ02-03	51	5	0	7	0	0	39
CASSLWGREVFF	TCRBV16-01	TCRBJ01-01	51	0	0	51	0	0	0
CASSMTISNERLFF	TCRBV19-01	TCRBJ01-04	51	0	0	0	0	0	51
CASSPDGYEQYF	TCRBV14-01	TCRBJ02-07	51	0	20	0	31	0	0
CASSPGTGNQAPLF	TCRBV04-01	TCRBJ01-05	51	0	19	10	0	22	0
CASSPRGTEVFF	TCRBV16-01	TCRBJ01-01	51	15	0	27	0	0	9
CASSPTENSDYTF	TCRBV02-01	TCRBJ01-02	51	0	0	0	16	35	0
CASSPTGGVYEQYF	TCRBV12-02	TCRBJ02-07	51	0	0	51	0	0	0
CASSQAGDQDTQYF	TCRBV05-01	TCRBJ02-05	51	0	34	0	0	17	0
CASSQDGGLGYEQYF	TCRBV02-01	TCRBJ02-07	51	6	0	0	20	25	0
CASSQDISNERLFF	TCRBV02-01	TCRBJ01-04	51	0	0	0	0	0	51
CASSQGDSDYTF	TCRBV02-01	TCRBJ01-02	51	0	0	0	0	0	51
CASSQVSYEQYF	TCRBV05-01	TCRBJ02-07	51	0	0	0	0	51	0
CASSQWGQGNSDYTF	TCRBV02-01	TCRBJ01-02	51	0	0	0	0	0	51
CASSRDRVYEQYF	TCRBV17-01	TCRBJ02-07	51	0	0	0	18	9	24
CASSRSYEQYF	TCRBV03-01	TCRBJ02-07	51	0	0	51	0	0	0
CASSRTGQLYF	TCRBV15-01	TCRBJ02-02	51	0	0	0	0	0	51
CASSSANSDYTF	TCRBV16-01	TCRBJ01-02	51	0	0	27	24	0	0
CASSSGGSYEQYF	TCRBV12-01	TCRBJ02-07	51	0	0	8	0	0	43
CASSSGISNERLFF	TCRBV03-01	TCRBJ01-04	51	0	0	45	0	0	6
CASSSGLGYEQYF	TCRBV13-01	TCRBJ02-07	51	0	0	0	0	0	51
CASSSGQYEQYF	TCRBV29-01	TCRBJ02-07	51	0	0	7	0	44	0
CASSSGTAYEQYF	TCRBV04-01	TCRBJ02-07	51	0	0	0	51	0	0
CASSSSSYEQYF	TCRBV15-01	TCRBJ02-07	51	0	8	19	15	9	0
CASTPGLGAYEQYF	TCRBV19-01	TCRBJ02-07	51	0	0	21	0	0	30
CASVPTGGGNTLYF	TCRBV13-02	TCRBJ02-04	51	0	0	0	0	0	51
CAWSLDRDEQYF	TCRBV31-01	TCRBJ02-07	51	0	0	0	0	13	38
CAWSLSGGAEQFF	TCRBV31-01	TCRBJ02-01	51	0	0	0	0	51	0
CAWSPRSGNTLYF	TCRBV31-01	TCRBJ01-03	51	0	0	0	22	0	29
CGARQGYAEQFF	TCRBV20-01	TCRBJ02-01	51	0	2	33	0	16	0
CTCSAAFSQNTLYF	TCRBV01-01	TCRBJ02-04	51	0	0	0	0	0	51
CTCSAAQNNQAPLF	TCRBV01-01	TCRBJ01-05	51	0	0	0	51	0	0
CTCSADLGDSDYTF	TCRBV01-01	TCRBJ01-02	51	0	0	0	0	0	51
CTCSAEGPVQYF	TCRBV01-01	TCRBJ02-07	51	0	51	0	0	0	0
CTCSAERNTLYF	TCRBV01-01	TCRBJ01-03	51	0	51	0	0	0	0
CTCSAEVGMGSYEQYF	TCRBV01-01	TCRBJ02-07	51	0	0	0	51	0	0
CTCSAGAGPYEQYF	TCRBV01-01	TCRBJ02-07	51	0	0	0	51	0	0
CTCSAGGASAETLYF	TCRBV01-01	TCRBJ02-03	51	0	0	23	0	28	0
CTCSAGGNSGNTLYF	TCRBV01-01	TCRBJ01-03	51	16	0	35	0	0	0
CTCSAGGSAETLYF	TCRBV01-01	TCRBJ02-03	51	0	0	0	10	0	41
CTCSAGLVEQYF	TCRBV01-01	TCRBJ02-07	51	0	0	0	51	0	0
CTCSAHRGRNTLYF	TCRBV01-01	TCRBJ01-03	51	0	0	0	0	0	51
CTCSAPGQGSNERLFF	TCRBV01-01	TCRBJ01-04	51	0	0	0	51	0	0
CTCSAPGTLNNQAPLF	TCRBV01-01	TCRBJ01-05	51	0	51	0	0	0	0
CTCSARQNNSPLYF	TCRBV01-01	TCRBJ01-06	51	13	4	0	34	0	0
CTCSARVYEQYF	TCRBV01-01	TCRBJ02-07	51	0	0	0	0	0	51
CTCSAVGQGAEQFF	TCRBV01-01	TCRBJ02-01	51	0	0	0	0	0	51
CTCSAVLGGRNTLYF	TCRBV01-01	TCRBJ02-04	51	0	0	0	0	0	51
CTCSDHWGPQNTLYF	TCRBV01-01	TCRBJ02-04	51	51	0	0	0	0	0
CTCSETGGSSYEQYF	TCRBV01-01	TCRBJ02-07	51	0	51	0	0	0	0
CTCSGDWGSSYEQYF	TCRBV01-01	TCRBJ02-07	51	0	17	0	34	0	0
CTCSGQGGLGGNTLYF	TCRBV01-01	TCRBJ01-03	51	0	0	0	51	0	0
CTCSPGGAYEQYF	TCRBV01-01	TCRBJ02-07	51	0	14	0	0	0	37
CTCSPGTGEYEQYF	TCRBV01-01	TCRBJ02-07	51	0	0	0	12	0	39
CTCSPTGAGNTLYF	TCRBV01-01	TCRBJ01-03	51	0	0	0	0	0	51
CTCSSGKEAPLF	TCRBV01-01	TCRBJ01-05	51	0	0	0	51	0	0
CASGDAQNSDYTF	TCRBV13-02	TCRBJ01-02	50	7	0	0	20	8	15
CASGDNYEQYF	TCRBV13-02	TCRBJ02-07	50	36	4	0	10	0	0
CASGDRGEDTQYF	TCRBV13-02	TCRBJ02-05	50	3	0	13	5	0	29
CASGDRTGGYEQYF	TCRBV13-02	TCRBJ02-07	50	0	0	24	20	6	0
CASGDTYEQYF	TCRBV13-02	TCRBJ02-07	50	2	0	0	7	16	25
CASGDVGGAETLYF	TCRBV13-02	TCRBJ02-03	50	12	0	0	0	12	26
CASGEDWGVYEQYF	TCRBV13-02	TCRBJ02-07	50	0	4	18	0	0	28
CASGERDTYEQYF	TCRBV13-02	TCRBJ02-07	50	0	0	13	37	0	0
CASGGDWGNTGQLYF	TCRBV13-02	TCRBJ02-02	50	4	0	41	0	5	0
CASGGTGGNTGQLYF	TCRBV13-02	TCRBJ02-02	50	4	14	0	32	0	0
CASLRGSNERLFF	TCRBV13-01	TCRBJ01-04	50	0	0	0	0	0	50
CASRQGSGNTLYF	TCRBV19-01	TCRBJ01-03	50	15	0	0	0	0	35
CASSDDGGAYEQYF	TCRBV13-03	TCRBJ02-07	50	0	0	0	9	0	41
CASSDGQYEQYF	TCRBV13-03	TCRBJ02-07	50	0	0	19	31	0	0
CASSDQGRSYNSPLYF	TCRBV13-03	TCRBJ01-06	50	0	0	0	50	0	0
CASSDRAETLYF	TCRBV13-03	TCRBJ02-03	50	0	0	25	0	0	25
CASSDRDREGDNQAPLF	TCRBV13-01	TCRBJ01-05	50	0	0	0	0	0	50
CASSDWGYEQYF	TCRBV13-03	TCRBJ02-07	50	0	0	45	0	5	0
CASSDYRGLFAETLYF	TCRBV13-03	TCRBJ02-03	50	0	0	0	0	0	50
CASSEQYEQYF	TCRBV13-03	TCRBJ02-07	50	30	20	0	0	0	0
CASSFLGGETLYF	TCRBV16-01	TCRBJ02-03	50	0	0	0	50	0	0
CASSFPGGYEQYF	TCRBV15-01	TCRBJ02-07	50	0	0	0	0	25	25
CASSFSSGNTLYF	TCRBV14-01	TCRBJ01-03	50	5	19	0	17	9	0
CASSFSYEQYF	TCRBV16-01	TCRBJ02-07	50	10	0	0	40	0	0
CASSGQFGNSDYTF	TCRBV13-03	TCRBJ01-02	50	0	0	0	50	0	0
CASSINAEQFF	TCRBV19-01	TCRBJ02-01	50	0	18	7	0	0	25
CASSIQGDSDYTF	TCRBV19-01	TCRBJ01-02	50	0	18	0	0	0	32
CASSIRGNSDYTF	TCRBV19-01	TCRBJ01-02	50	0	0	0	30	4	16
CASSISNSGNTLYF	TCRBV19-01	TCRBJ01-03	50	0	24	0	0	0	26
CASSIWGRTGQLYF	TCRBV19-01	TCRBJ02-02	50	0	0	0	0	50	0
CASSKQGNQDTQYF	TCRBV16-01	TCRBJ02-05	50	0	0	0	0	50	0
CASSLAGFPDYTF	TCRBV16-01	TCRBJ01-02	50	0	0	0	0	0	50
CASSLAGLGYEQYF	TCRBV16-01	TCRBJ02-07	50	0	0	0	50	0	0
CASSLDERLFF	TCRBV12-01	TCRBJ01-04	50	18	0	0	0	0	32
CASSLDKNSDYTF	TCRBV12-01	TCRBJ01-02	50	0	0	0	0	0	50
CASSLDTGQLYF	TCRBV16-01	TCRBJ02-02	50	18	0	9	23	0	0
CASSLDWGGAETLYF	TCRBV12-01	TCRBJ02-03	50	13	0	0	0	15	22
CASSLEAQAPLF	TCRBV03-01	TCRBJ01-05	50	0	0	0	50	0	0
CASSLGGPDYTF	TCRBV12-02	TCRBJ01-02	50	0	0	0	38	12	0
CASSLGGSAETLYF	TCRBV03-01	TCRBJ02-03	50	0	11	0	26	13	0
CASSLGLGGYEQYF	TCRBV04-01	TCRBJ02-07	50	0	0	26	24	0	0
CASSLGNYAEQFF	TCRBV12-02	TCRBJ02-01	50	0	12	0	38	0	0
CASSLGQVNTGQLYF	TCRBV12-02	TCRBJ02-02	50	0	0	50	0	0	0
CASSLGSAETLYF	TCRBV15-01	TCRBJ02-03	50	0	4	0	46	0	0
CASSLGTGGYEQYF	TCRBV04-01	TCRBJ02-07	50	0	8	0	13	29	0
CASSLGTGYEQYF	TCRBV03-01	TCRBJ02-07	50	0	17	33	0	0	0
CASSLHSNQAPLF	TCRBV29-01	TCRBJ01-05	50	0	0	0	50	0	0
CASSLTGGSYEQYF	TCRBV13-01	TCRBJ02-07	50	0	4	0	35	11	0
CASSLVGSSYEQYF	TCRBV16-01	TCRBJ02-07	50	0	0	28	22	0	0
CASSPDRGNTEVFF	TCRBV19-01	TCRBJ01-01	50	0	0	0	50	0	0
CASSPDWGANTGQLYF	TCRBV04-01	TCRBJ02-02	50	0	50	0	0	0	0
CASSPGTGDYEQYF	TCRBV05-01	TCRBJ02-07	50	0	0	0	50	0	0
CASSQDIYNNQAPLF	TCRBV02-01	TCRBJ01-05	50	20	0	30	0	0	0
CASSQDTYNSPLYF	TCRBV05-01	TCRBJ01-06	50	0	0	0	11	11	28
CASSQDWGGEQYF	TCRBV05-01	TCRBJ02-07	50	0	16	18	4	12	0
CASSQEGASAETLYF	TCRBV05-01	TCRBJ02-03	50	0	4	8	21	0	17
CASSQEGSAETLYF	TCRBV02-01	TCRBJ02-03	50	0	0	10	40	0	0
CASSQEGTGDSDYTF	TCRBV02-01	TCRBJ01-02	50	0	19	17	0	14	0
CASSQEPSAETLYF	TCRBV02-01	TCRBJ02-03	50	0	0	0	6	0	44
CASSRDSSGNTLYF	TCRBV19-01	TCRBJ01-03	50	0	0	6	15	0	29
CASSRGTGGEQYF	TCRBV12-02	TCRBJ02-07	50	0	0	0	37	13	0
CASSRTQYEQYF	TCRBV17-01	TCRBJ02-07	50	0	0	0	0	0	50
CASSSGTEQYF	TCRBV03-01	TCRBJ02-07	50	20	0	0	30	0	0
CASSSKYEQYF	TCRBV04-01	TCRBJ02-07	50	0	0	0	0	0	50
CASSSPGKYEQYF	TCRBV16-01	TCRBJ02-07	50	0	0	0	50	0	0
CASSSQSYEQYF	TCRBV16-01	TCRBJ02-07	50	0	0	0	0	0	50
CASSSSLTGNEQYF	TCRBV15-01	TCRBJ02-07	50	0	0	0	0	0	50
CASSSTGPSYEQYF	TCRBV16-01	TCRBJ02-07	50	0	0	23	27	0	0
CASSTGTENTLYF	TCRBV19-01	TCRBJ02-04	50	0	0	0	0	0	50
CASSTGYEQYF	TCRBV13-03	TCRBJ02-07	50	7	0	19	14	0	10
CASSTQNTLYF	TCRBV16-01	TCRBJ02-04	50	0	0	50	0	0	0
CASSWDWGAYEQYF	TCRBV03-01	TCRBJ02-07	50	0	0	0	0	9	41
CAWSLGGNQDTQYF	TCRBV31-01	TCRBJ02-05	50	15	10	10	0	0	15
CAWSLGRGSGNTLYF	TCRBV31-01	TCRBJ01-03	50	0	0	0	50	0	0
CAWSLPGEDTQYF	TCRBV31-01	TCRBJ02-05	50	10	15	0	15	10	0
CAWSLTGANSDYTF	TCRBV31-01	TCRBJ01-02	50	0	22	0	0	28	0
CGAREGNSDYTF	TCRBV20-01	TCRBJ01-02	50	2	12	14	18	4	0
CTCRGGSSYEQYF	TCRBV01-01	TCRBJ02-07	50	0	0	0	50	0	0
CTCSADAGGREQYF	TCRBV01-01	TCRBJ02-07	50	0	18	32	0	0	0
CTCSADGGGAGTGQLYF	TCRBV01-01	TCRBJ02-02	50	0	0	0	0	0	50
CTCSADQRYEQYF	TCRBV01-01	TCRBJ02-07	50	0	0	0	0	0	50
CTCSADRGQNTLYF	TCRBV01-01	TCRBJ02-04	50	27	0	16	0	7	0
CTCSADTKNSDYTF	TCRBV01-01	TCRBJ01-02	50	0	0	0	50	0	0
CTCSADYEQYF	TCRBV01-01	TCRBJ02-07	50	0	4	24	22	0	0
CTCSAGDRGDEQYF	TCRBV01-01	TCRBJ02-07	50	0	50	0	0	0	0
CTCSAGGSNERLFF	TCRBV01-01	TCRBJ01-04	50	4	5	12	29	0	0
CTCSAGNEQYF	TCRBV01-01	TCRBJ02-07	50	0	50	0	0	0	0
CTCSAGTENTLYF	TCRBV01-01	TCRBJ02-04	50	0	16	0	26	8	0
CTCSAGTGGGEQYF	TCRBV01-01	TCRBJ02-07	50	0	0	5	0	45	0
CTCSAGYRDRNTEVFF	TCRBV01-01	TCRBJ01-01	50	0	0	0	0	0	50
CTCSARDKNTEVFF	TCRBV01-01	TCRBJ01-01	50	10	0	0	6	0	34
CTCSARDKYEQYF	TCRBV01-01	TCRBJ02-07	50	0	0	0	0	0	50
CTCSARTGNTEVFF	TCRBV01-01	TCRBJ01-01	50	0	0	0	50	0	0
CTCSDPGNNQAPLF	TCRBV01-01	TCRBJ01-05	50	0	0	0	50	0	0
CTCSDRDRNQAPLF	TCRBV01-01	TCRBJ01-05	50	0	0	50	0	0	0
CTCSGDRGGSYEQYF	TCRBV01-01	TCRBJ02-07	50	0	0	0	0	0	50
CTCSGLGNTGQLYF	TCRBV01-01	TCRBJ02-02	50	0	0	0	50	0	0
CTCSPSDTEVFF	TCRBV01-01	TCRBJ01-01	50	0	0	0	50	0	0
CASGDAGGSQNTLYF	TCRBV13-02	TCRBJ02-04	49	9	19	4	6	0	11
CASGDALGGAETLYF	TCRBV13-02	TCRBJ02-03	49	0	7	0	8	12	22
CASGDAQSGNTLYF	TCRBV13-02	TCRBJ01-03	49	0	0	0	19	10	20
CASGDNNNQAPLF	TCRBV13-02	TCRBJ01-05	49	11	0	0	21	17	0
CASGERGWEQYF	TCRBV13-02	TCRBJ02-07	49	0	0	13	0	0	36
CASGETDSGNTLYF	TCRBV13-02	TCRBJ01-03	49	0	6	25	18	0	0
CASGVDSGNTLYF	TCRBV13-02	TCRBJ01-03	49	0	17	0	16	16	0
CASGVPGTSQSYEQYF	TCRBV13-02	TCRBJ02-07	49	0	0	0	0	0	49
CASRAGVEQYF	TCRBV13-03	TCRBJ02-07	49	0	0	0	0	0	49
CASRGDRAQAPLF	TCRBV13-01	TCRBJ01-05	49	0	0	0	49	0	0
CASRQGTSAETLYF	TCRBV29-01	TCRBJ02-03	49	0	0	0	49	0	0
CASRYRVGNQAPLF	TCRBV29-01	TCRBJ01-05	49	0	0	0	0	0	49
CASSAESGEQYF	TCRBV13-01	TCRBJ02-07	49	0	0	0	49	0	0
CASSDAGSSYEQYF	TCRBV13-01	TCRBJ02-07	49	0	0	18	31	0	0
CASSDAKYEQYF	TCRBV13-03	TCRBJ02-07	49	0	0	0	49	0	0
CASSDLGGLNQDTQYF	TCRBV13-01	TCRBJ02-05	49	0	0	0	49	0	0
CASSDPGTTSAETLYF	TCRBV13-01	TCRBJ02-03	49	0	0	0	0	0	49
CASSDRGGPYEQYF	TCRBV13-01	TCRBJ02-07	49	0	0	0	49	0	0
CASSFDNSGNTLYF	TCRBV16-01	TCRBJ01-03	49	16	4	0	12	17	0
CASSFGTGGTEQYF	TCRBV03-01	TCRBJ02-07	49	0	0	0	49	0	0
CASSFPWGDGEQYF	TCRBV14-01	TCRBJ02-07	49	0	0	0	0	0	49
CASSFQANTEVFF	TCRBV15-01	TCRBJ01-01	49	0	0	0	0	0	49
CASSHRGEQYF	TCRBV05-01	TCRBJ02-07	49	0	0	0	49	0	0
CASSHRNSDYTF	TCRBV04-01	TCRBJ01-02	49	0	0	9	20	0	20
CASSIGGGSAETLYF	TCRBV19-01	TCRBJ02-03	49	10	4	16	0	10	9
CASSIGTEVFF	TCRBV19-01	TCRBJ01-01	49	13	4	0	0	7	25
CASSIGVNYAEQFF	TCRBV19-01	TCRBJ02-01	49	0	0	49	0	0	0
CASSIRVQDTQYF	TCRBV19-01	TCRBJ02-05	49	0	0	0	7	42	0
CASSLAREYEQYF	TCRBV03-01	TCRBJ02-07	49	0	0	0	0	0	49
CASSLATNPNTGQLYF	TCRBV03-01	TCRBJ02-02	49	0	0	0	0	0	49
CASSLATNSDYTF	TCRBV29-01	TCRBJ01-02	49	0	0	0	49	0	0
CASSLDGSDYTF	TCRBV16-01	TCRBJ01-02	49	0	0	0	13	0	36
CASSLDNQAPLF	TCRBV03-01	TCRBJ01-05	49	15	0	23	0	11	0
CASSLDRGGEQYF	TCRBV03-01	TCRBJ02-07	49	0	0	0	35	14	0
CASSLDRGYEQYF	TCRBV16-01	TCRBJ02-07	49	0	19	0	0	30	0
CASSLERGLVGNTLYF	TCRBV12-02	TCRBJ01-03	49	0	0	0	0	0	49
CASSLGGAGYEQYF	TCRBV03-01	TCRBJ02-07	49	0	0	0	37	12	0
CASSLGQATEVFF	TCRBV05-01	TCRBJ01-01	49	0	0	0	0	0	49
CASSLGTTNSDYTF	TCRBV12-01	TCRBJ01-02	49	33	2	14	0	0	0
CASSLLGYEQYF	TCRBV12-02	TCRBJ02-07	49	0	0	24	25	0	0
CASSLQDTQYF	TCRBV04-01	TCRBJ02-05	49	0	36	0	7	6	0
CASSLRGNEQYF	TCRBV03-01	TCRBJ02-07	49	0	0	49	0	0	0
CASSLSRDEQYF	TCRBV03-01	TCRBJ02-07	49	0	0	17	32	0	0
CASSLTGGNTGQLYF	TCRBV15-01	TCRBJ02-02	49	0	0	0	5	0	44
CASSPDNYAEQFF	TCRBV03-01	TCRBJ02-01	49	0	0	0	23	26	0
CASSPDWGEYEQYF	TCRBV12-01	TCRBJ02-07	49	0	0	0	0	0	49
CASSPDWGGYAEQFF	TCRBV03-01	TCRBJ02-01	49	0	10	8	27	4	0
CASSPGQGYNSPLYF	TCRBV29-01	TCRBJ01-06	49	0	0	0	7	4	38
CASSPGTANSDYTF	TCRBV02-01	TCRBJ01-02	49	0	4	15	18	12	0
CASSPGTTNSDYTF	TCRBV16-01	TCRBJ01-02	49	18	0	0	0	31	0
CASSPQGYEQYF	TCRBV16-01	TCRBJ02-07	49	0	0	0	12	20	17
CASSPSYEQYF	TCRBV14-01	TCRBJ02-07	49	0	0	0	0	0	49
CASSPTANSDYTF	TCRBV05-01	TCRBJ01-02	49	10	0	0	24	15	0
CASSPTGANSDYTF	TCRBV03-01	TCRBJ01-02	49	0	0	14	0	0	35
CASSQAGLDAEQFF	TCRBV05-01	TCRBJ02-01	49	0	0	0	0	49	0
CASSQDGGGEDTQYF	TCRBV05-01	TCRBJ02-05	49	0	0	0	0	49	0
CASSQDKYEQYF	TCRBV05-01	TCRBJ02-07	49	0	0	0	18	0	31
CASSQDLAWSYEQYF	TCRBV02-01	TCRBJ02-07	49	0	0	0	49	0	0
CASSQDPLGGPGQLYF	TCRBV02-01	TCRBJ02-02	49	0	0	0	0	49	0
CASSQDQGYEQYF	TCRBV02-01	TCRBJ02-07	49	0	0	17	0	28	4
CASSQEGNSDYTF	TCRBV02-01	TCRBJ01-02	49	5	19	8	17	0	0
CASSQRGAETLYF	TCRBV02-01	TCRBJ02-03	49	0	0	0	49	0	0
CASSQTGGAYEQYF	TCRBV02-01	TCRBJ02-07	49	0	0	0	0	49	0
CASSQTTNSDYTF	TCRBV02-01	TCRBJ01-02	49	20	0	0	29	0	0
CASSQWTGGYEQYF	TCRBV02-01	TCRBJ02-07	49	0	0	9	18	22	0
CASSRTVSNERLFF	TCRBV14-01	TCRBJ01-04	49	0	0	20	29	0	0
CASSSDWGGDEQYF	TCRBV16-01	TCRBJ02-07	49	0	0	17	32	0	0
CASSSGLGSAETLYF	TCRBV03-01	TCRBJ02-03	49	0	0	0	0	0	49
CASSSGLGVYEQYF	TCRBV03-01	TCRBJ02-07	49	4	0	0	45	0	0
CASSSGRNSDYTF	TCRBV03-01	TCRBJ01-02	49	17	0	0	32	0	0
CASSSGVNQAPLF	TCRBV29-01	TCRBJ01-05	49	0	0	0	49	0	0
CASSSTDSGNTLYF	TCRBV16-01	TCRBJ01-03	49	0	25	0	24	0	0
CASSYLNSDYTF	TCRBV04-01	TCRBJ01-02	49	0	0	0	49	0	0
CASSYPGQDSYEQYF	TCRBV14-01	TCRBJ02-07	49	0	0	0	0	0	49
CASSYPGTGETLYF	TCRBV04-01	TCRBJ02-03	49	0	0	0	0	0	49
CASSYSAETLYF	TCRBV14-01	TCRBJ02-03	49	12	0	0	37	0	0
CAWSLDSSGNTLYF	TCRBV31-01	TCRBJ01-03	49	0	0	39	0	10	0
CAWSLGGGGAEQFF	TCRBV31-01	TCRBJ02-01	49	0	0	15	21	13	0
CAWTSGGDDTLYF	TCRBV31-01	TCRBJ02-04	49	0	0	0	49	0	0
CGARAGLEQYF	TCRBV20-01	TCRBJ02-07	49	0	0	0	0	0	49
CGARGGYEQYF	TCRBV20-01	TCRBJ02-07	49	0	4	0	15	30	0
CGARNRGDSDYTF	TCRBV20-01	TCRBJ01-02	49	0	0	0	25	24	0
CTCRGEDTQYF	TCRBV01-01	TCRBJ02-05	49	0	0	0	49	0	0
CTCRRTEFSYEQYF	TCRBV01-01	TCRBJ02-07	49	0	49	0	0	0	0
CTCSAALRSSYEQYF	TCRBV01-01	TCRBJ02-07	49	0	0	0	49	0	0
CTCSADKSYEQYF	TCRBV01-01	TCRBJ02-07	49	0	0	0	0	0	49
CTCSADLPGDGNTLYF	TCRBV01-01	TCRBJ01-03	49	0	49	0	0	0	0
CTCSADQGRTQAPLF	TCRBV01-01	TCRBJ01-05	49	0	0	0	49	0	0
CTCSADQISNERLFF	TCRBV01-01	TCRBJ01-04	49	0	0	0	0	49	0
CTCSADRGWGYEQYF	TCRBV01-01	TCRBJ02-07	49	0	49	0	0	0	0
CTCSAGGDAEQFF	TCRBV01-01	TCRBJ02-01	49	0	0	34	0	15	0
CTCSAGGEQYF	TCRBV01-01	TCRBJ02-07	49	0	15	34	0	0	0
CTCSAGLVSYEQYF	TCRBV01-01	TCRBJ02-07	49	0	0	0	0	49	0
CTCSAGTGREQYF	TCRBV01-01	TCRBJ02-07	49	25	0	0	0	24	0
CTCSAGTYEQYF	TCRBV01-01	TCRBJ02-07	49	0	0	29	0	20	0
CTCSAKDTQYF	TCRBV01-01	TCRBJ02-05	49	0	0	24	0	25	0
CTCSAPGLFYEQYF	TCRBV01-01	TCRBJ02-07	49	0	0	0	49	0	0
CTCSDRDRRQAPLF	TCRBV01-01	TCRBJ01-05	49	0	49	0	0	0	0
CTCSGTGDQDTQYF	TCRBV01-01	TCRBJ02-05	49	0	0	0	36	13	0
CTCSSPTGYEQYF	TCRBV01-01	TCRBJ02-07	49	0	0	0	49	0	0
CTCSVGLGAEQYF	TCRBV01-01	TCRBJ02-07	49	0	0	0	0	0	49
LCQPQRQSSYEQYF	TCRBV26-01	TCRBJ02-07	49	0	49	0	0	0	0
LCQQSRDTGQLYF	TCRBV26-01	TCRBJ02-02	49	0	0	49	0	0	0
CACSGTINERLFF	TCRBV31-01	TCRBJ01-04	48	0	0	0	0	0	48
CALQGPNERLFF	TCRBV31-01	TCRBJ01-04	48	0	0	0	48	0	0
CASGDAGDAEQFF	TCRBV13-02	TCRBJ02-01	48	0	31	0	0	17	0
CASGDAGGNSPLYF	TCRBV13-02	TCRBJ01-06	48	0	0	0	14	30	4
CASGDAGSSAETLYF	TCRBV13-02	TCRBJ02-03	48	15	0	7	0	26	0
CASGDANTEVFF	TCRBV13-02	TCRBJ01-01	48	0	16	6	13	0	13
CASGDFEQYF	TCRBV13-02	TCRBJ02-07	48	5	3	0	34	6	0
CASGDGGNERLFF	TCRBV13-02	TCRBJ01-04	48	9	0	18	15	6	0
CASGDWGGSAETLYF	TCRBV13-02	TCRBJ02-03	48	7	0	19	18	4	0
CASGEGGAETLYF	TCRBV13-02	TCRBJ02-03	48	0	0	0	48	0	0
CASGEQYF	TCRBV13-02	TCRBJ02-07	48	0	0	15	5	28	0
CASGGGQGYAEQFF	TCRBV13-02	TCRBJ02-01	48	0	0	0	32	16	0
CASGGPGWEQYF	TCRBV13-02	TCRBJ02-07	48	0	0	0	48	0	0
CASGPGANTGQLYF	TCRBV13-02	TCRBJ02-02	48	0	0	0	16	0	32
CASGPYEQYF	TCRBV13-02	TCRBJ02-07	48	0	4	17	6	13	8
CASRDWGGSYEQYF	TCRBV04-01	TCRBJ02-07	48	0	19	0	17	12	0
CASRTGYEQYF	TCRBV13-03	TCRBJ02-07	48	0	0	13	35	0	0
CASSDAETLYF	TCRBV13-01	TCRBJ02-03	48	10	0	11	27	0	0
CASSDDRGHEQYF	TCRBV13-01	TCRBJ02-07	48	0	0	0	0	8	40
CASSDENSPLYF	TCRBV13-03	TCRBJ01-06	48	0	17	0	0	0	31
CASSDGVEQYF	TCRBV13-03	TCRBJ02-07	48	0	0	0	0	0	48
CASSDLGYEQYF	TCRBV13-01	TCRBJ02-07	48	0	0	0	0	48	0
CASSDPGQNYAEQFF	TCRBV13-01	TCRBJ02-01	48	0	0	0	44	4	0
CASSDRGVNTEVFF	TCRBV15-01	TCRBJ01-01	48	0	0	0	0	0	48
CASSDRPEQYF	TCRBV12-01	TCRBJ02-07	48	0	0	0	0	0	48
CASSDWGGEQYF	TCRBV13-03	TCRBJ02-07	48	5	0	0	13	0	30
CASSFGGSGNTLYF	TCRBV14-01	TCRBJ01-03	48	0	0	0	12	0	36
CASSFPGDTEVFF	TCRBV03-01	TCRBJ01-01	48	0	0	0	0	0	48
CASSFQGAETLYF	TCRBV16-01	TCRBJ02-03	48	8	0	0	0	0	40
CASSFRDRGQAPLF	TCRBV03-01	TCRBJ01-05	48	0	0	0	48	0	0
CASSGTGNTEVFF	TCRBV13-01	TCRBJ01-01	48	0	0	12	8	0	28
CASSGVGAETLYF	TCRBV02-01	TCRBJ02-03	48	0	0	0	0	0	48
CASSLDWGEDTQYF	TCRBV03-01	TCRBJ02-05	48	0	4	9	0	35	0
CASSLDWGSSYEQYF	TCRBV12-02	TCRBJ02-07	48	41	7	0	0	0	0
CASSLEGTGNTLYF	TCRBV03-01	TCRBJ01-03	48	14	18	16	0	0	0
CASSLEGVGNTLYF	TCRBV16-01	TCRBJ01-03	48	11	0	0	37	0	0
CASSLEISNERLFF	TCRBV03-01	TCRBJ01-04	48	4	0	12	5	0	27
CASSLGDNQAPLF	TCRBV12-01	TCRBJ01-05	48	0	0	0	0	0	48
CASSLGGSAETLYF	TCRBV15-01	TCRBJ02-03	48	10	6	0	32	0	0
CASSLGHANSDYTF	TCRBV03-01	TCRBJ01-02	48	0	21	0	0	0	27
CASSLGTANTGQLYF	TCRBV12-02	TCRBJ02-02	48	0	0	0	48	0	0
CASSLKGGEQYF	TCRBV03-01	TCRBJ02-07	48	15	0	33	0	0	0
CASSLKGYEQYF	TCRBV03-01	TCRBJ02-07	48	0	0	31	0	17	0
CASSLQGASAETLYF	TCRBV03-01	TCRBJ02-03	48	0	0	0	48	0	0
CASSLRGRGNTLYF	TCRBV03-01	TCRBJ01-03	48	0	0	0	0	0	48
CASSLRLGGREQYF	TCRBV12-02	TCRBJ02-07	48	0	0	0	48	0	0
CASSLSQNTLYF	TCRBV04-01	TCRBJ02-04	48	0	15	0	23	0	10
CASSLTGANTEVFF	TCRBV03-01	TCRBJ01-01	48	0	15	33	0	0	0
CASSLTGDAEQFF	TCRBV03-01	TCRBJ02-01	48	0	14	0	0	0	34
CASSLTGGNTGQLYF	TCRBV03-01	TCRBJ02-02	48	0	0	25	0	0	23
CASSLVLYEQYF	TCRBV03-01	TCRBJ02-07	48	0	0	26	0	22	0
CASSLVQQDTQYF	TCRBV16-01	TCRBJ02-05	48	0	0	11	37	0	0
CASSLWDSYAEQFF	TCRBV12-01	TCRBJ02-01	48	0	16	0	32	0	0
CASSLWGADTEVFF	TCRBV29-01	TCRBJ01-01	48	0	0	0	16	0	32
CASSMGGSSYEQYF	TCRBV19-01	TCRBJ02-07	48	0	0	13	35	0	0
CASSMGQGAGNTLYF	TCRBV03-01	TCRBJ01-03	48	0	0	0	0	0	48
CASSNRGAETLYF	TCRBV12-02	TCRBJ02-03	48	0	0	0	0	0	48
CASSPGLGGNYAEQFF	TCRBV03-01	TCRBJ02-01	48	6	12	0	14	16	0
CASSPGQANTEVFF	TCRBV29-01	TCRBJ01-01	48	0	0	0	0	48	0
CASSPHWGYEQYF	TCRBV16-01	TCRBJ02-07	48	0	0	0	0	0	48
CASSPPREQYF	TCRBV29-01	TCRBJ02-07	48	0	0	0	0	0	48
CASSPRDWGYEQYF	TCRBV04-01	TCRBJ02-07	48	14	0	20	14	0	0
CASSPRLGGYEQYF	TCRBV16-01	TCRBJ02-07	48	0	27	21	0	0	0
CASSPSYEQYF	TCRBV16-01	TCRBJ02-07	48	15	0	0	0	17	16
CASSPTANSDYTF	TCRBV16-01	TCRBJ01-02	48	0	0	0	32	16	0
CASSPTGDSDYTF	TCRBV12-01	TCRBJ01-02	48	0	0	0	48	0	0
CASSQDGGNNQAPLF	TCRBV02-01	TCRBJ01-05	48	0	0	34	0	14	0
CASSQDNNQAPLF	TCRBV02-01	TCRBJ01-05	48	0	0	0	20	0	28
CASSQDRGNYAEQFF	TCRBV02-01	TCRBJ02-01	48	0	4	13	0	9	22
CASSQDRISNERLFF	TCRBV02-01	TCRBJ01-04	48	10	0	20	0	18	0
CASSQDRNSPLYF	TCRBV05-01	TCRBJ01-06	48	31	0	0	15	2	0
CASSQDTEQYF	TCRBV02-01	TCRBJ02-07	48	0	0	30	18	0	0
CASSQGTGQDTQYF	TCRBV02-01	TCRBJ02-05	48	5	8	12	0	23	0
CASSRDNSNERLFF	TCRBV19-01	TCRBJ01-04	48	0	34	0	0	14	0
CASSRDRGNTGQLYF	TCRBV29-01	TCRBJ02-02	48	0	0	15	0	33	0
CASSRKNSDYTF	TCRBV04-01	TCRBJ01-02	48	11	0	0	0	0	37
CASSSGGLYAEQFF	TCRBV03-01	TCRBJ02-01	48	0	0	0	0	48	0
CASSSGLGGREQYF	TCRBV04-01	TCRBJ02-07	48	0	0	0	0	48	0
CASSSGLGSYEQYF	TCRBV03-01	TCRBJ02-07	48	0	0	0	48	0	0
CASSSGTGPYEQYF	TCRBV03-01	TCRBJ02-07	48	6	0	0	30	12	0
CASSSGTGRAETLYF	TCRBV14-01	TCRBJ02-03	48	0	0	0	0	0	48
CASSSGTSSGNTLYF	TCRBV03-01	TCRBJ01-03	48	0	0	0	48	0	0
CASSSTGGEQYF	TCRBV03-01	TCRBJ02-07	48	0	0	18	30	0	0
CASSYGTANSDYTF	TCRBV04-01	TCRBJ01-02	48	4	0	0	0	0	44
CASTPDRNSDYTF	TCRBV13-01	TCRBJ01-02	48	0	0	0	0	0	48
CAWGTGGGSDYTF	TCRBV31-01	TCRBJ01-02	48	0	0	48	0	0	0
CAWSHGRGGYEQYF	TCRBV31-01	TCRBJ02-07	48	0	0	0	48	0	0
CAWSLASERLFF	TCRBV31-01	TCRBJ01-04	48	0	0	0	0	0	48
CAWSLGDNERLFF	TCRBV31-01	TCRBJ01-04	48	0	6	0	42	0	0
CAWSLGGSQNTLYF	TCRBV31-01	TCRBJ02-04	48	0	0	0	0	48	0
CAWSLGGSSYEQYF	TCRBV31-01	TCRBJ02-07	48	0	0	28	12	8	0
CAWSLGPSGNTLYF	TCRBV31-01	TCRBJ01-03	48	0	12	0	36	0	0
CAWSLGSQNTLYF	TCRBV31-01	TCRBJ02-04	48	0	0	0	0	0	48
CAWSLKGVYEQYF	TCRBV31-01	TCRBJ02-07	48	0	48	0	0	0	0
CAWSPFANSDYTF	TCRBV31-01	TCRBJ01-02	48	0	0	0	48	0	0
CAWSPGASDYTF	TCRBV31-01	TCRBJ01-02	48	0	0	0	48	0	0
CAWSPGYEQYF	TCRBV31-01	TCRBJ02-07	48	0	0	0	48	0	0
CAWSQGGQNTLYF	TCRBV31-01	TCRBJ02-04	48	0	0	0	0	0	48
CAWSRDSAETLYF	TCRBV31-01	TCRBJ02-03	48	35	0	0	0	13	0
CAWSWAGRNSDYTF	TCRBV31-01	TCRBJ01-02	48	0	48	0	0	0	0
CGARDRGNSDYTF	TCRBV20-01	TCRBJ01-02	48	19	0	0	5	0	24
CGARDSNNQAPLF	TCRBV20-01	TCRBJ01-05	48	0	0	0	20	28	0
CGAREGVSNERLFF	TCRBV20-01	TCRBJ01-04	48	35	13	0	0	0	0
CGARRQSSYEQYF	TCRBV20-01	TCRBJ02-07	48	26	0	0	22	0	0
CSSSDRGNQAPLF	TCRBV23-01	TCRBJ01-05	48	0	0	0	0	0	48
CSSSQLGSEQYF	TCRBV23-01	TCRBJ02-07	48	0	0	0	0	0	48
CTCRVAETLYF	TCRBV01-01	TCRBJ02-03	48	0	48	0	0	0	0
CTCSAATEVFF	TCRBV01-01	TCRBJ01-01	48	0	48	0	0	0	0
CTCSADQNSDYTF	TCRBV01-01	TCRBJ01-02	48	0	0	0	15	0	33
CTCSADQNTEVFF	TCRBV01-01	TCRBJ01-01	48	18	0	30	0	0	0
CTCSADQYEQYF	TCRBV01-01	TCRBJ02-07	48	0	2	0	46	0	0
CTCSADRVNNQAPLF	TCRBV01-01	TCRBJ01-05	48	48	0	0	0	0	0
CTCSADSSAETLYF	TCRBV01-01	TCRBJ02-03	48	13	0	0	35	0	0
CTCSADWDRDNQAPLF	TCRBV01-01	TCRBJ01-05	48	0	48	0	0	0	0
CTCSAEAGIEQYF	TCRBV01-01	TCRBJ02-07	48	0	0	0	48	0	0
CTCSAETGGAREQYF	TCRBV01-01	TCRBJ02-07	48	13	0	35	0	0	0
CTCSAETGTNSDYTF	TCRBV01-01	TCRBJ01-02	48	0	0	0	48	0	0
CTCSAGGGDQNTLYF	TCRBV01-01	TCRBJ02-04	48	0	0	0	48	0	0
CTCSAGNERLFF	TCRBV01-01	TCRBJ01-04	48	0	0	0	25	23	0
CTCSAGTGNERLFF	TCRBV01-01	TCRBJ01-04	48	0	48	0	0	0	0
CTCSAHWGWEYEQYF	TCRBV01-01	TCRBJ02-07	48	0	48	0	0	0	0
CTCSARDSAETLYF	TCRBV01-01	TCRBJ02-03	48	0	0	0	48	0	0
CTCSASANTEVFF	TCRBV01-01	TCRBJ01-01	48	0	0	0	22	26	0
CTCSASLDLEQYF	TCRBV01-01	TCRBJ02-07	48	0	0	48	0	0	0
CTCSATGQLSDYTF	TCRBV01-01	TCRBJ01-02	48	0	0	0	48	0	0
CTCSDYEQYF	TCRBV01-01	TCRBJ02-07	48	0	0	0	0	48	0
CTCSGDRANTEVFF	TCRBV01-01	TCRBJ01-01	48	0	0	17	7	24	0
CASGDERGEAPLF	TCRBV13-02	TCRBJ01-05	47	0	0	0	0	0	47
CASGDGGEQYF	TCRBV13-02	TCRBJ02-07	47	0	0	11	36	0	0
CASGDGISNERLFF	TCRBV13-02	TCRBJ01-04	47	4	5	8	0	30	0
CASGDRDRGLNERLFF	TCRBV13-02	TCRBJ01-04	47	0	0	47	0	0	0
CASGDSHSGNTLYF	TCRBV13-02	TCRBJ01-03	47	24	0	0	0	23	0
CASGDVGNTGQLYF	TCRBV13-02	TCRBJ02-02	47	0	0	47	0	0	0
CASGDVWGGYEQYF	TCRBV13-02	TCRBJ02-07	47	14	0	0	0	12	21
CASGEQGAGNTLYF	TCRBV13-02	TCRBJ01-03	47	0	0	0	27	0	20
CASGGGGSAETLYF	TCRBV13-02	TCRBJ02-03	47	0	0	12	35	0	0
CASGGRPANERLFF	TCRBV13-02	TCRBJ01-04	47	0	0	47	0	0	0
CASGPGQNNQAPLF	TCRBV13-02	TCRBJ01-05	47	5	0	14	28	0	0
CASGPPASGNTLYF	TCRBV13-01	TCRBJ01-03	47	0	0	0	0	0	47
CASRHTGQLYF	TCRBV13-01	TCRBJ02-02	47	0	0	0	47	0	0
CASRTGGALEQYF	TCRBV13-03	TCRBJ02-07	47	0	0	0	47	0	0
CASSALESSYEQYF	TCRBV13-03	TCRBJ02-07	47	0	0	0	0	0	47
CASSDAGGGYYEQYF	TCRBV13-01	TCRBJ02-07	47	0	0	0	32	0	15
CASSDAGNQAPLF	TCRBV13-01	TCRBJ01-05	47	0	0	5	29	13	0
CASSDASDYTF	TCRBV13-01	TCRBJ01-02	47	0	0	0	0	0	47
CASSDGTASAETLYF	TCRBV13-01	TCRBJ02-03	47	0	0	0	0	0	47
CASSDGTGGSSYEQYF	TCRBV13-01	TCRBJ02-07	47	0	0	0	0	0	47
CASSDPDSDYTF	TCRBV13-01	TCRBJ01-02	47	0	13	0	0	34	0
CASSDPRISAETLYF	TCRBV13-03	TCRBJ02-03	47	0	0	0	0	0	47
CASSDQGAETLYF	TCRBV13-01	TCRBJ02-03	47	0	29	0	0	18	0
CASSEGYEQYF	TCRBV13-01	TCRBJ02-07	47	0	6	7	0	34	0
CASSFGGVSGNTLYF	TCRBV29-01	TCRBJ01-03	47	0	0	0	0	0	47
CASSFRVNSDYTF	TCRBV04-01	TCRBJ01-02	47	0	0	0	0	0	47
CASSFVSQNTLYF	TCRBV16-01	TCRBJ02-04	47	0	0	43	0	4	0
CASSGDWGGYEQYF	TCRBV13-03	TCRBJ02-07	47	0	0	0	0	18	29
CASSGTGGAYEQYF	TCRBV13-03	TCRBJ02-07	47	11	0	0	36	0	0
CASSHGGVYEQYF	TCRBV05-01	TCRBJ02-07	47	0	0	0	0	0	47
CASSHPVEQYF	TCRBV02-01	TCRBJ02-07	47	0	0	0	0	0	47
CASSIGTANTEVFF	TCRBV19-01	TCRBJ01-01	47	20	0	0	27	0	0
CASSIRGSAETLYF	TCRBV19-01	TCRBJ02-03	47	0	19	0	12	0	16
CASSLAGGAETLYF	TCRBV16-01	TCRBJ02-03	47	0	0	0	0	23	24
CASSLARLGVSYEQYF	TCRBV03-01	TCRBJ02-07	47	0	47	0	0	0	0
CASSLDSSNSDYTF	TCRBV03-01	TCRBJ01-02	47	0	0	0	47	0	0
CASSLDWGGSYEQYF	TCRBV16-01	TCRBJ02-07	47	0	17	0	30	0	0
CASSLDWGGYAEQFF	TCRBV03-01	TCRBJ02-01	47	0	0	11	24	12	0
CASSLEGAGEQYF	TCRBV03-01	TCRBJ02-07	47	0	0	0	33	14	0
CASSLEGTGGSEQYF	TCRBV03-01	TCRBJ02-07	47	19	0	0	0	0	28
CASSLGASAETLYF	TCRBV12-02	TCRBJ02-03	47	0	35	0	0	12	0
CASSLGGGYAEQFF	TCRBV03-01	TCRBJ02-01	47	0	0	24	23	0	0
CASSLGNYAEQFF	TCRBV13-03	TCRBJ02-01	47	0	0	0	19	0	28
CASSLGQNSDYTF	TCRBV04-01	TCRBJ01-02	47	0	0	7	0	0	40
CASSLGQNSDYTF	TCRBV12-02	TCRBJ01-02	47	0	47	0	0	0	0
CASSLGTDEQYF	TCRBV03-01	TCRBJ02-07	47	18	0	0	29	0	0
CASSLGTGVYEQYF	TCRBV12-02	TCRBJ02-07	47	0	0	0	0	47	0
CASSLLGASAETLYF	TCRBV03-01	TCRBJ02-03	47	0	0	0	47	0	0
[truncated: 115,124 more rows]

## Sheet: Non-productive
	1 C57BL/6	2 C57BL/6	3 C57BL/6	1 TCRα+/-β+/-	2 TCRα+/-β+/-	3 TCRα+/-β+/-
TCRBJ01-01	727	657	889	263	258	105
TCRBJ01-02	980	909	926	201	280	91
TCRBJ01-03	793	666	748	159	176	55
TCRBJ01-04	993	920	924	167	173	65
TCRBJ01-05	534	462	519	72	88	33
TCRBJ01-06	527	498	544	90	105	53
TCRBJ01-07	5	12	22	2	3	1
TCRBJ02-01	1196	1042	1146	187	201	86
TCRBJ02-02	558	481	545	75	94	28
TCRBJ02-03	862	780	908	126	123	44
TCRBJ02-04	586	561	658	116	92	28
TCRBJ02-05	992	829	1106	142	171	58
TCRBJ02-06	5	5	8	0	0	0
TCRBJ02-07	1927	1787	1863	349	349	156
	1 C57BL/6	2 C57BL/6	3 C57BL/6	1 TCRα+/-β+/-	2 TCRα+/-β+/-	3 TCRα+/-β+/-
TCRBV01-01	507	420	434	83	78	23
TCRBV02-01	520	465	597	86	99	37
TCRBV03-01	596	585	665	78	83	27
TCRBV04-01	1090	956	1073	103	104	46
TCRBV05-01	549	494	516	59	75	27
TCRBV09-01	0	1	0	0	0	0
TCRBV10-01	4	11	17	0	1	1
TCRBV12-01	622	550	601	52	60	18
TCRBV12-02	199	204	241	25	25	9
TCRBV13-01	382	364	422	34	47	30
TCRBV13-02	690	541	693	95	74	27
TCRBV13-03	384	331	346	44	31	23
TCRBV14-01	240	221	256	23	28	7
TCRBV15-01	484	471	520	37	53	14
TCRBV16-01	465	433	479	51	48	16
TCRBV17-01	255	286	279	24	17	11
TCRBV19-01	713	675	695	65	100	38
TCRBV20-01	380	326	377	33	29	14
TCRBV21-01	81	76	89	7	6	0
TCRBV22-01	59	58	60	8	4	0
TCRBV23-01	67	70	75	14	8	7
TCRBV24-01	742	618	706	49	63	27
TCRBV26-01	1090	931	1042	893	1003	363
TCRBV29-01	292	274	335	29	31	19
TCRBV30-01	27	25	16	1	5	2
TCRBV31-01	258	232	285	56	42	17
